# Supplementary material for: CO2 reduction to CO on an iron-porphyrin complex with crown-ether appended cation-binding site
Source: Royal Society of Chemistry journal article supplement (doi:10.1039/d5dt00119f), 2025-01-01
Supplement: d5dt00119f1.pdf [file d5dt00119f1.pdf]

# Electronic Supporting Information

## CO<sub>2</sub> Reduction to CO on an Iron-Porphyrin Complex with Crown-Ether Appended Cation-Binding Site

Chengxu Zhu,<sup>ab</sup> Adarsh Koovakattil Surendren,<sup>c</sup> Carmine D'Agostino,<sup>bd</sup> Jana Roithova,<sup>\*c</sup> and Sam P. de Visser<sup>\*ab</sup>

---

<sup>a</sup> Manchester Institute of Biotechnology, The University of Manchester, 131 Princess Street, Manchester M1 7DN, United Kingdom.

<sup>b</sup> Department of Chemical Engineering, The University of Manchester, Oxford Road, Manchester M13 9PL, United Kingdom.

<sup>c</sup> Department of Spectroscopy and Catalysis, Institute for Molecules and Materials, Radboud University, Heyendaalseweg 135, 6525 AJ Nijmegen, The Netherlands.

<sup>d</sup> Dipartimento di Ingegneria Civile, Chimica, Ambientale e dei Materiali (DICAM), Alma Mater Studiorum – Università di Bologna, Via Terracini, 28, 40131 Bologna, Italy.

Corresponding author emails:

[j.roithova@science.ru.nl](mailto:j.roithova@science.ru.nl) (JR) and [sam.devisser@manchester.ac.uk](mailto:sam.devisser@manchester.ac.uk) (SPdV)

## Experimental Details

### 1. Cyclic voltammetry

Homogeneous cyclic voltammetry (CV) experiments were performed using a standard three-electrode cell in a solution containing 0.25 M of the [(TPP<sup>Mes</sup>Crown)Fe<sup>III</sup>(OAc)] and 0.1 M of the corresponding supporting electrolytes (*n*-Bu<sub>4</sub>BF<sub>4</sub>, NaBF<sub>4</sub>, KBF<sub>4</sub>) in 10 mL dimethylformamide (DMF) with the water concentration at 0.5 M. A glassy carbon working electrode (WE) was used and polished between each measurement. A double junction non-aqueous Ag/AgCl reference electrode (RE) filled with 2 M LiCl in ethanol as the inner electrolyte and the DMF solution as the outer electrolyte was used. The counter electrode (CE) was a platinum mesh of 2 cm<sup>2</sup> area. The reference electrode was calibrated against the ferrocene/ferrocenium redox couple. Prior to the measurements, the solution was deoxygenated with argon or saturated with CO<sub>2</sub> for 30 minutes, and during the measurements, the corresponding gas was kept flowing over the head space.

### 2. Synthesis of [(TPP<sup>Mes</sup>Crown)Fe<sup>III</sup>(OAc)] complex

#### 2.1 Synthesis of mesityldipyrromethane

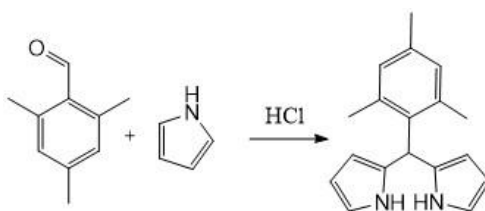

A Schenk flask flushed with nitrogen was filled with 200 mL of water containing 3 mL of concentrated HCl, 2,4,6-trimethylbenzaldehyde (4.00 g, 1 eq, 27.0 mmol), and 1H-pyrrole (5.43 g, 3 eq, 81.0 mmol). A white emulsion was formed and stirred overnight at room temperature under nitrogen shielded from light (covered with Al foil). A black solid was formed, filtered, and washed with 3 × 50 mL water followed by 3 × 50 mL heptane. The solid was then dissolved in dichloromethane (giving a dark green solution) and purified by silica column chromatography using eluent dichloromethane/heptane 60/40. The fraction was evaporated, and a white solid was obtained, followed by washing it with heptane and then pentane. The yield of white solid 2,2'-(mesitylmethylene)bis(1H-pyrrole) was 2.678 g, 37.5%.

<sup>1</sup>H NMR (Fig. S1) (400 MHz, CDCl<sub>3</sub>) δ 7.93 (s, 2H), 6.86 (s, 2H), 6.68 – 6.63 (m, 2H), 6.20 – 6.14 (m, 2H), 6.00 (s, 2H), 5.92 (s, 1H), 2.28 (s, 3H), 2.06 (s, 6H).

#### 2.2 Synthesis of *N,N*-bisformylphenoxyacetyl-4,13-diaza-18-crown-6-ether

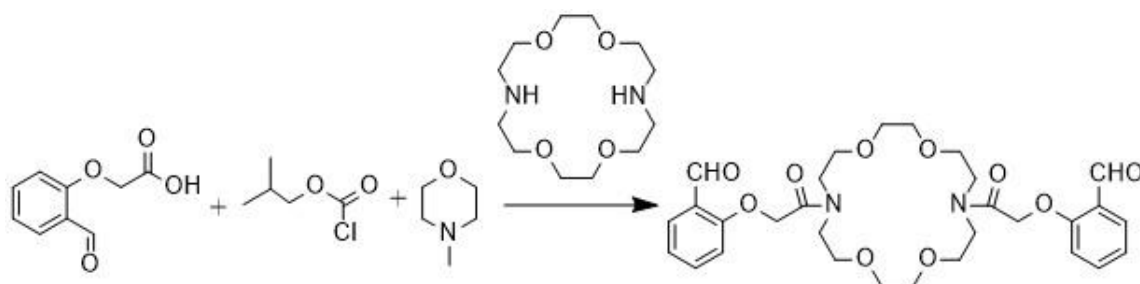

A Schlenk round-bottom flask of 100 mL with a stirring bar was filled with 50 mL of dry THF and 2-(2-formylphenoxy)acetic acid (369.1 mg, 2.15 eq, 2.049 mmol). The reaction mixture was cooled to  $-40\text{ }^{\circ}\text{C}$  (in a dry ice bath), and then isobutyl chloroformate (312.4 mg, 2.4 eq, 2.287 mmol) and 4-methylmorpholine (231.3 mg, 2.4 eq, 2.287 mmol) were added slowly. The reaction mixture was stirred at  $-40\text{ }^{\circ}\text{C}$  for two hours. A white solid appeared, and 1,4,10,13-tetraoxa-7,16-diazacyclooctadecane (250.0 mg, 1 eq, 952.9  $\mu\text{mol}$ ) was added, and stirring at  $-40\text{ }^{\circ}\text{C}$  was continued for 15 min. After that, the reaction mixture was gradually heated up by not adding dry ice to the cooling bath and allowed to react overnight. The reaction mixture analysed using electrospray ionisation-mass spectrometry (ESI-MS) showed the mass disubstituted product (*N,N*-bisformylphenoxyacetyl-4,13-diaza-18-crown-6-ether). The reaction mixture was evaporated to dryness and used directly for the next step.

ESI-MS (Fig. S2):  $m/z$   $[\text{M}+\text{Na}]^+$ ,  $[\text{C}_{30}\text{H}_{38}\text{N}_2\text{NaO}_{10}]^+$  Calculated: 609.24, Observed: 609.40

### 2.3 Synthesis of crown-capped dimesityldiphenylporphyrin ( $\text{H}_2(\text{TPP}^{\text{Mes}}\text{Crown})$ )

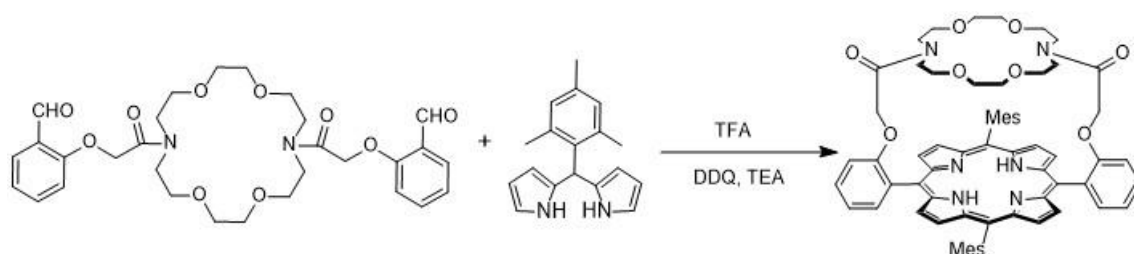

The *N,N*-bisformylphenoxyacetyl 4,13-diaza-18-crown-6-ether residue from the previous step, and the mesityldipyrromethane (504 mg, 2 eq, 1.91 mmol) was dissolved in dichloromethane. The solution was sparged with nitrogen, and trifluoroacetic acid (65.2 mg, 0.6 eq, 572  $\mu\text{mol}$ ) was added. The solution was shielded from light and stirred overnight under nitrogen. Further, 2,3-dichloro-5,6-dicyano-1,4-benzoquinone (DDQ) (541 mg, 2.5 eq, 2.38 mmol) was added to the solution and left under stirring. After 1.5 hours, 3 mL triethylamine was added, and the solution was stirred for another 30 minutes. The reaction mixture was concentrated and purified over silica column chromatography. Two pre-fractions were collected using 1% methanol in dichloromethane as the eluent, and then methanol was increased to 2.5%, and a purple fraction containing the product was collected. The fraction was concentrated and further purified on a 60H silica column using 1.5% methanol in dichloromethane as the eluent. Finally, the purified fraction was concentrated and then precipitated with heptane. The solid was centrifuged and washed with pentane (four times) and dried to the yield crown-capped dimesityldiphenylporphyrin (290 mg, 270  $\mu\text{mol}$ , 28% yield).

$^1\text{H}$  NMR (Fig. S3) (400 MHz,  $\text{CDCl}_3$ )  $\delta$  8.76-8.69 (m, 8H), 8.18-8.16 (dd,  $J = 7.5, 1.7$  Hz, 2H), 7.82-7.78 (m, 2H), 7.48-7.44 (td,  $J = 7.5, 1.0$  Hz, 2H), 7.41-7.39 (d,  $J = 8.3$  Hz, 2H), 7.32 (s, 2H), 7.24 (s, 2H), 4.65 (s, 4H), 2.92 (s, 3H), 2.69-2.59 (m, 14H), 2.02 (s, 6H), 1.94 (t,  $J = 4.8$  Hz, 4H), 1.66 (s, 6H), 1.53 (s, 2H), -0.04 (t,  $J = 4.7$  Hz, 4H), -0.48 (s, 3H), -2.59 (s, 2H).

## 2.4 Synthesis of Fe(III)(crown-capped dimesityldiphenylporphyrin)OAc

**([(TPP<sup>Mes</sup>Crown)Fe<sup>III</sup>(OAc)])**

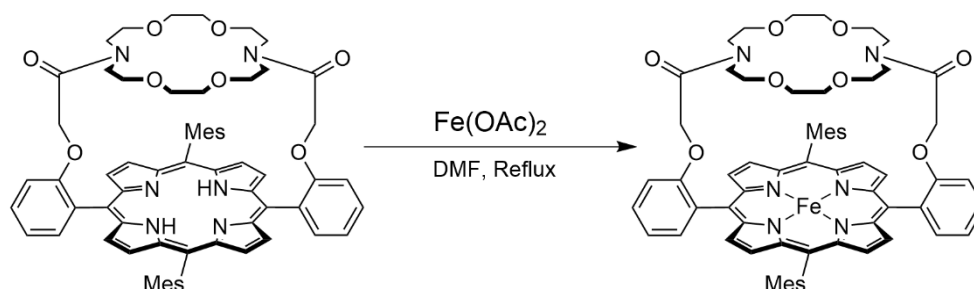

A round bottom flask was filled with 25 mL of deoxygenated dimethylformamide (DMF) containing H<sub>2</sub>(TPP<sup>Mes</sup>Crown) (100 mg, 1 eq, 93.2 μmol) and diacetoxyiron (89.1 mg, 5.5 eq, 512 μmol). The reaction mixture was shielded from light and brought to reflux (160 °C) under nitrogen for 3 hours. After cooling down, acetic acid was added and stirred for another one hour in the open air. Water (50 mL) was added to the reaction mixture and extracted with dichloromethane (5 × 35 mL). The combined dichloromethane layers were washed with water (5 × 50 mL). The dichloromethane layer was concentrated, and heptane was added. The dichloromethane was evaporated to yield the solid product. The solid was isolated by centrifuge and washed with pentane (4 × pentane/centrifuge), and dried to obtain [(TPP<sup>Mes</sup>Crown)Fe<sup>III</sup>(OAc)] (59.5 mg, 50.2 μmol, 53.8 % yield).

ESI-MS (TOF) (Fig. S4): [M+(Na<sup>+</sup>)]<sup>+</sup>, [(TPP<sup>Mes</sup>Crown)Fe<sup>III</sup>(OAc)(Na)]<sup>+</sup> m/z calculated 1208.4317, m/z observed 1208.4306; [M-(OAc)]<sup>+</sup>, [(TPP<sup>Mes</sup>Crown)Fe<sup>III</sup>]<sup>+</sup> m/z calculated 1126.4292, m/z observed 1126.4299.

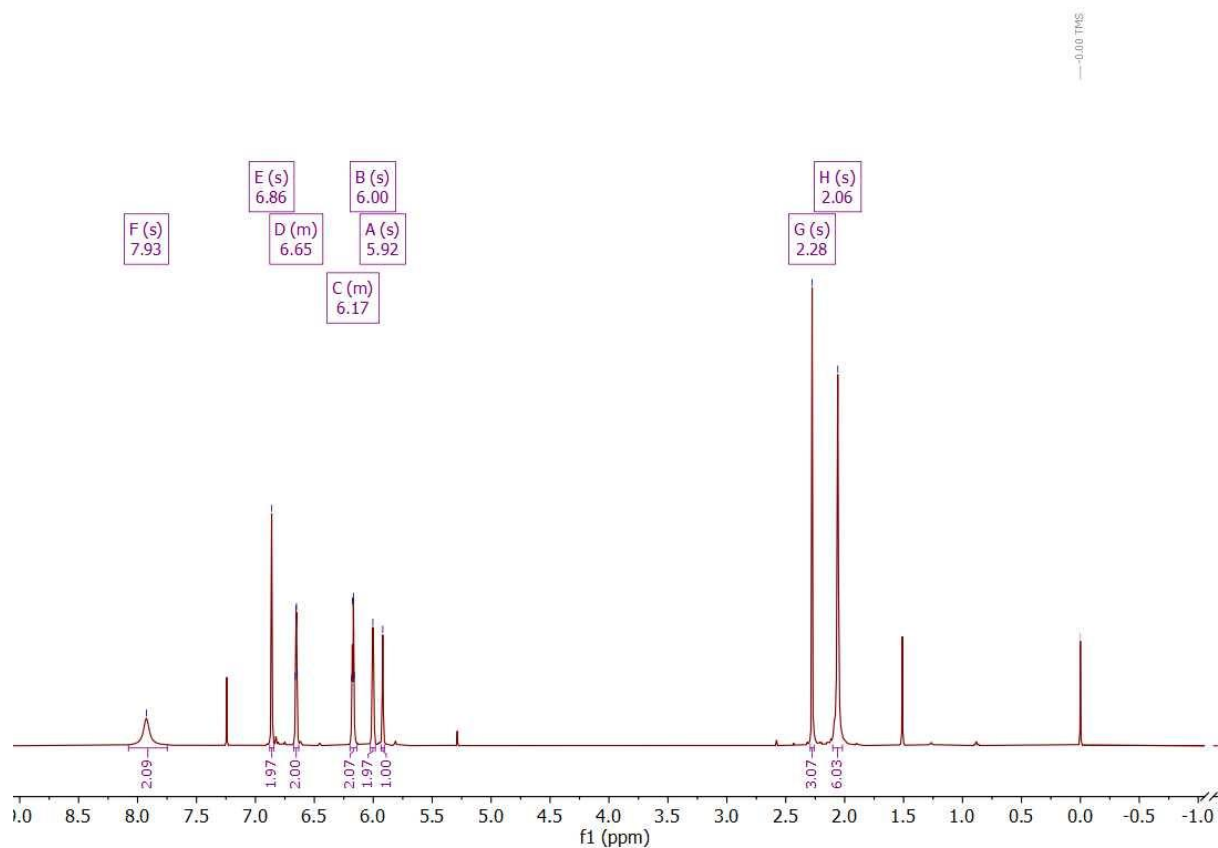

**Fig. S1.**  $^1\text{H}$  NMR spectrum of mesityldipyrromethane (400 MHz,  $\text{CDCl}_3$ ).

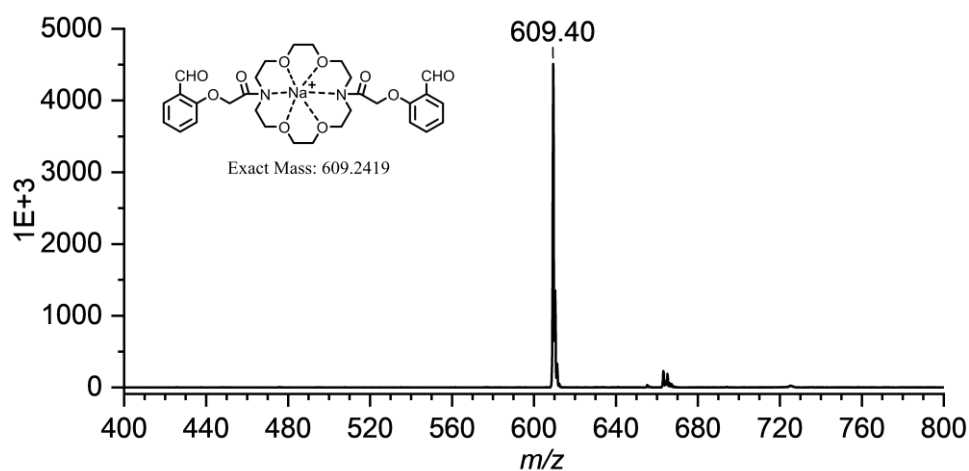

**Fig. S2.** ESI-MS (Thermo Finnigan LCQ Deca) mass spectrum of *N,N*-bisformylphenoxyacetyl-4,13-diaza-18-crown-6-ether  $[\text{M}+\text{Na}]^+ = m/z$  609.40.

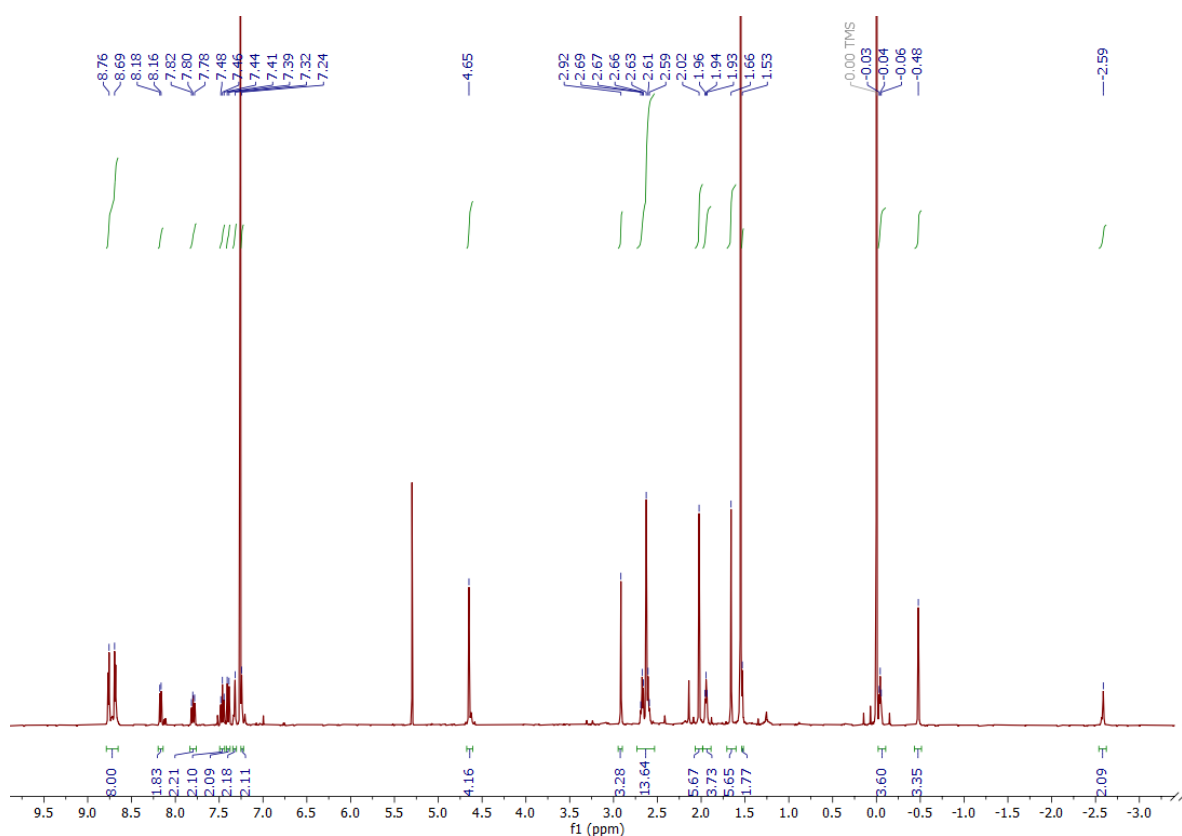

**Fig. S3.**  $^1\text{H}$  NMR spectrum of  $\text{H}_2(\text{TPP}^{\text{Mes}}\text{Crown})$  (400 MHz,  $\text{CDCl}_3$ ).

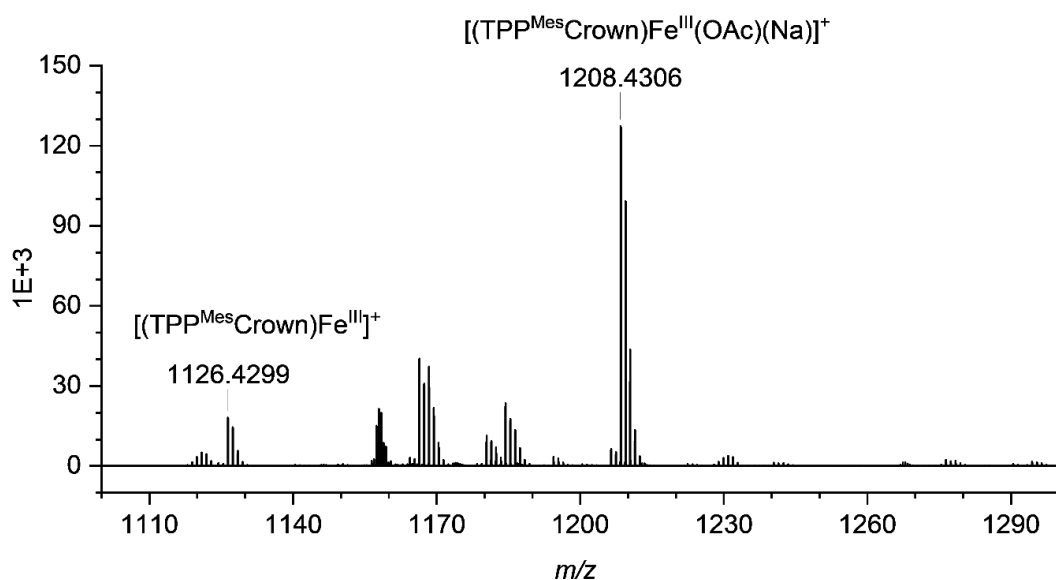

**Fig. S4.** ESI-MS (Bruker, timsTOF) mass spectrum of  $[(\text{TPP}^{\text{Mes}}\text{Crown})\text{Fe}^{\text{III}}(\text{OAc})]$  in the presence of  $\text{NaBF}_4$  salt, detected as  $[(\text{TPP}^{\text{Mes}}\text{Crown})\text{Fe}^{\text{III}}(\text{OAc})(\text{Na})]^+$ :  $m/z$  1208.4306 and  $[(\text{TPP}^{\text{Mes}}\text{Crown})\text{Fe}^{\text{III}}]^+$ :  $m/z$  1126.4299.

**Table S1: Absolute energies and free energies (in au) for UB3LYP-GD3BJ/BS1 optimized geometries for CO<sub>2</sub> reduction on an iron-porphyrin center with/without nearby K<sup>+</sup> using H<sub>3</sub>O<sup>+</sup>, phenol or acetate as a proton source.**

|                                             | E [au, BS1]  | ZPE      | G            | E [au,BS2]   |
|---------------------------------------------|--------------|----------|--------------|--------------|
| <b>H<sub>3</sub>O<sup>+</sup></b>           |              |          |              |              |
| <sup>2</sup> CAT <sub>H3O+</sub>            | -4587.404689 | 1.066504 | -4586.435419 | -4591.188919 |
| <sup>3</sup> CAT <sub>H3O+</sub>            | -4587.490629 | 1.062391 | -4586.525911 | -4591.278140 |
| <sup>3</sup> RC1 <sub>H3O+</sub>            | -4852.772171 | 1.114180 | -4851.760795 | -4856.868489 |
| <sup>3</sup> IM1 <sub>H3O+</sub>            | -4852.800085 | 1.115876 | -4851.789252 | -4856.903592 |
| <sup>3</sup> RC2 <sub>H3O+</sub>            | -4853.223192 | 1.126182 | -4852.202849 | -4857.320692 |
| <sup>3</sup> IM2 <sub>H3O+</sub>            | -4853.290896 | 1.125608 | -4852.274494 | -4857.396762 |
| <sup>4</sup> CAT <sub>H3O+</sub>            | -4587.391863 | 1.066022 | -4586.423664 | -4591.176653 |
| <sup>5</sup> CAT <sub>H3O+</sub>            | -4587.471954 | 1.063349 | -4586.506096 | -4591.259860 |
| <sup>5</sup> RC1 <sub>H3O+</sub>            | -4852.764580 | 1.112011 | -4851.755962 | -4856.857424 |
| <sup>5</sup> IM1 <sub>H3O+</sub>            | -4852.788577 | 1.114669 | -4851.781143 | -4856.889837 |
| <sup>5</sup> RC2 <sub>H3O+</sub>            | -4853.225846 | 1.124544 | -4852.209623 | -4857.323323 |
| <sup>5</sup> IM2 <sub>H3O+</sub>            | -4853.283947 | 1.123434 | -4852.270961 | -4857.386909 |
| <sup>2</sup> CAT <sub>H3O+,K+</sub>         | -5187.265604 | 1.067524 | -5186.298284 | -5191.110762 |
| <sup>3</sup> CAT <sub>H3O+,K+</sub>         | -5187.354082 | 1.065355 | -5186.391690 | -5191.203501 |
| <sup>3</sup> RC1 <sub>H3O+,K+</sub>         | -5452.626611 | 1.116194 | -5451.614907 | -5456.782012 |
| <sup>3</sup> IM1 <sub>H3O+,K+</sub>         | -5452.648184 | 1.116736 | -5451.639015 | -5456.810510 |
| <sup>3</sup> RC2 <sub>H3O+,K+</sub>         | -5453.068123 | 1.126790 | -5452.049449 | -5457.225416 |
| <sup>3</sup> TS2 <sub>H3O+,K+</sub>         | -5453.076019 | 1.126001 | -5452.057176 | -5457.231028 |
| <sup>3</sup> IM2 <sub>H3O+,K+</sub>         | -5453.140882 | 1.126912 | -5452.123957 | -5457.308372 |
| <sup>4</sup> CAT <sub>H3O+,K+</sub>         | -5187.261996 | 1.067565 | -5186.294064 | -5191.10681  |
| <sup>5</sup> CAT <sub>H3O+,K+</sub>         | -5187.350117 | 1.064721 | -5186.385416 | -5191.197633 |
| <sup>5</sup> RC1 <sub>H3O+,K+</sub>         | -5452.613576 | 1.113642 | -5451.606889 | -5456.768711 |
| <sup>5</sup> IM1 <sub>H3O+,K+</sub>         | -5452.651480 | 1.115433 | -5451.643982 | -5456.812878 |
| <sup>5</sup> RC2 <sub>H3O+,K+</sub>         | -5453.069007 | 1.125570 | -5452.050611 | -5457.225974 |
| <sup>5</sup> TS2 <sub>H3O+,K+</sub>         | -5453.086164 | 1.124552 | -5452.067475 | -5457.241761 |
| <sup>5</sup> IM2 <sub>H3O+,K+</sub>         | -5453.137093 | 1.125293 | -5452.122943 | -5457.302426 |
| <b>phenol</b>                               |              |          |              |              |
| <sup>3</sup> RC1 <sub>phenol,K+</sub>       | -5683.105971 | 1.185644 | -5682.031202 | -5687.507107 |
| <sup>5</sup> RC1 <sub>phenol,K+</sub>       | -5683.092219 | 1.183377 | -5682.023243 | -5687.492791 |
| <sup>3</sup> RC1 <sub>phenol, 6W, K+</sub>  | -6065.094394 | 1.313519 | -6063.903983 | -6069.958867 |
| <sup>5</sup> RC1 <sub>phenol, 6W, K+</sub>  | -6065.037907 | 1.310238 | -6063.853744 | -6069.902873 |
| <b>acetate</b>                              |              |          |              |              |
| <sup>3</sup> RC1 <sub>acetate,K+</sub>      | -5604.752623 | 1.142108 | -5603.720928 | -5609.087443 |
| <sup>5</sup> RC1 <sub>acetate,K+</sub>      | -5604.739781 | 1.140133 | -5603.710740 | -5609.072379 |
| <sup>5</sup> TS1 <sub>acetate,K+</sub>      | -5604.718308 | 1.135460 | -5603.692740 | -5609.054274 |
| <sup>5</sup> IM1 <sub>acetate,K+</sub>      | -5604.735224 | 1.140103 | -5603.705841 | -5609.075897 |
| <sup>5</sup> RC2 <sub>acetate,K+</sub>      | -5605.217797 | 1.153260 | -5604.177196 | -5609.549445 |
| <sup>5</sup> TS2 <sub>acetate,K+</sub>      | -5605.221445 | 1.147683 | -5604.188925 | -5609.553966 |
| <sup>5</sup> IM2 <sub>acetate,K+</sub>      | -5605.241660 | 1.149963 | -5604.206575 | -5609.575401 |
| <sup>3</sup> RC1 <sub>Ac, 6W, K+</sub>      | -5986.705409 | 1.267449 | -5985.558433 | -5991.501598 |
| <sup>3</sup> TS1 <sub>acetate, 6W, K+</sub> | -5986.703255 | 1.264086 | -5985.558928 | -5991.498899 |
| <sup>3</sup> IM1 <sub>acetate, 6W, K+</sub> | -5986.707065 | 1.268557 | -5985.558978 | -5991.505482 |
| <sup>3</sup> RC2 <sub>acetate, 6W, K+</sub> | -5987.170947 | 1.282746 | -5986.010089 | -5991.962601 |
| <sup>3</sup> IM2 <sub>acetate, 6W, K+</sub> | -5987.211491 | 1.280719 | -5986.054804 | -5992.014555 |
| <sup>5</sup> RC1 <sub>acetate, 6W, K+</sub> | -5986.684029 | 1.266321 | -5985.538967 | -5991.482361 |
| <sup>5</sup> TS1 <sub>acetate, 6W, K+</sub> | -5986.649671 | 1.262808 | -5985.507400 | -5991.445074 |
| <sup>5</sup> IM1 <sub>acetate, 6W, K+</sub> | -5986.652342 | 1.267019 | -5985.506514 | -5991.450036 |
| <sup>5</sup> RC2 <sub>acetate, 6W, K+</sub> | -5987.116616 | 1.279820 | -5985.959074 | -5991.909516 |

**Table S2: Relative (free) energies (in kcal mol<sup>-1</sup>) of the CO<sub>2</sub> reduction on an iron-porphyrin center with/without nearby K<sup>+</sup> using H<sub>3</sub>O<sup>+</sup>, phenol or acetate as a proton source as obtained with UB3LYP-GD3BJ in Gaussian-09.**

|                                             | $\Delta E(\text{BS1})$ | $\Delta E+\text{ZPE}(\text{BS1})$ | $\Delta G(\text{BS1})$ | $\Delta E(\text{BS2})$ | $\Delta E+\text{ZPE}(\text{BS2})$ | $\Delta G(\text{BS2})$ |
|---------------------------------------------|------------------------|-----------------------------------|------------------------|------------------------|-----------------------------------|------------------------|
| <b>H<sub>3</sub>O<sup>+</sup></b>           |                        |                                   |                        |                        |                                   |                        |
| <sup>2</sup> CAT <sub>H3O+</sub>            | 53.93                  | 56.51                             | 56.78                  | 55.99                  | 58.57                             | 58.84                  |
| <sup>3</sup> CAT <sub>H3O+</sub>            | 0.00                   | 0.00                              | 0.00                   | 0.00                   | 0.00                              | 0.00                   |
| <sup>3</sup> RC1 <sub>H3O+</sub>            | 0.00                   | 0.00                              | 0.00                   | 0.00                   | 0.00                              | 0.00                   |
| <sup>3</sup> IM1 <sub>H3O+</sub>            | -17.52                 | -16.45                            | -17.86                 | -22.03                 | -20.96                            | -22.37                 |
| <sup>3</sup> RC2 <sub>H3O+</sub>            | -17.52                 | -16.45                            | -17.86                 | -22.03                 | -20.96                            | -22.37                 |
| <sup>3</sup> IM2 <sub>H3O+</sub>            | -60.00                 | -59.30                            | -62.82                 | -69.76                 | -69.06                            | -72.58                 |
| <sup>4</sup> CAT <sub>H3O+</sub>            | 55.02                  | 55.34                             | 54.76                  | 59.16                  | 59.47                             | 58.89                  |
| <sup>5</sup> CAT <sub>H3O+</sub>            | 4.76                   | 3.40                              | 3.03                   | 6.94                   | 5.58                              | 5.21                   |
| <sup>5</sup> RC1 <sub>H3O+</sub>            | 4.76                   | 3.40                              | 3.03                   | 6.94                   | 5.58                              | 5.21                   |
| <sup>5</sup> IM1 <sub>H3O+</sub>            | -10.30                 | -9.99                             | -12.77                 | -13.40                 | -13.09                            | -15.87                 |
| <sup>5</sup> RC2 <sub>H3O+</sub>            | -10.30                 | -9.99                             | -12.77                 | -13.40                 | -13.09                            | -15.87                 |
| <sup>5</sup> IM2 <sub>H3O+</sub>            | -46.75                 | -47.14                            | -51.26                 | -53.30                 | -53.69                            | -57.80                 |
| <sup>2</sup> CAT <sub>H3O+,K+</sub>         | 55.52                  | 56.88                             | 58.61                  | 58.19                  | 59.56                             | 61.29                  |
| <sup>3</sup> CAT <sub>H3O+,K+</sub>         | 0.00                   | 0.00                              | 0.00                   | 0.00                   | 0.00                              | 0.00                   |
| <sup>3</sup> RC1 <sub>H3O+,K+</sub>         | 0.00                   | 0.00                              | 0.00                   | 0.00                   | 0.00                              | 0.00                   |
| <sup>3</sup> IM1 <sub>H3O+,K+</sub>         | -13.54                 | -13.20                            | -15.13                 | -17.88                 | -17.54                            | -19.47                 |
| <sup>3</sup> RC2 <sub>H3O+,K+</sub>         | -13.54                 | -13.20                            | -15.13                 | -17.88                 | -17.54                            | -19.47                 |
| <sup>3</sup> TS2 <sub>H3O+,K+</sub>         | -18.49                 | -18.65                            | -19.98                 | -21.40                 | -21.56                            | -22.89                 |
| <sup>3</sup> IM2 <sub>H3O+,K+</sub>         | -59.19                 | -58.78                            | -61.88                 | -69.94                 | -69.52                            | -72.63                 |
| <sup>4</sup> CAT <sub>H3O+,K+</sub>         | 63.48                  | 63.66                             | 62.36                  | 65.34                  | 65.52                             | 64.22                  |
| <sup>5</sup> CAT <sub>H3O+,K+</sub>         | 8.18                   | 6.58                              | 5.03                   | 8.35                   | 6.75                              | 5.20                   |
| <sup>5</sup> RC1 <sub>H3O+,K+</sub>         | 8.18                   | 6.58                              | 5.03                   | 8.35                   | 6.75                              | 5.20                   |
| <sup>5</sup> IM1 <sub>H3O+,K+</sub>         | -15.61                 | -16.08                            | -18.24                 | -19.37                 | -19.85                            | -22.01                 |
| <sup>5</sup> RC2 <sub>H3O+,K+</sub>         | -15.61                 | -16.08                            | -18.24                 | -19.37                 | -19.85                            | -22.01                 |
| <sup>5</sup> TS2 <sub>H3O+,K+</sub>         | -26.37                 | -27.49                            | -28.83                 | -29.28                 | -30.39                            | -31.73                 |
| <sup>5</sup> IM2 <sub>H3O+,K+</sub>         | -58.33                 | -58.98                            | -63.63                 | -67.34                 | -68.00                            | -72.65                 |
| <b>phenol</b>                               |                        |                                   |                        |                        |                                   |                        |
| <sup>3</sup> RC1 <sub>phenol,K+</sub>       | 0.00                   | 0.00                              | 0.00                   | 0.00                   | 0.00                              | 0.00                   |
| <sup>5</sup> RC1 <sub>phenol,K+</sub>       | 8.63                   | 7.21                              | 4.99                   | 8.98                   | 7.56                              | 5.35                   |
| <sup>3</sup> RC1 <sub>phenol, 6W, K+</sub>  | 0.00                   | 0.00                              | 0.00                   | 0.00                   | 0.00                              | 0.00                   |
| <sup>5</sup> RC1 <sub>phenol, 6W, K+</sub>  | 35.45                  | 33.39                             | 31.53                  | 35.14                  | 33.08                             | 31.22                  |
| <b>acetate</b>                              |                        |                                   |                        |                        |                                   |                        |
| <sup>3</sup> RC1 <sub>acetate,K+</sub>      | 0.00                   | 0.00                              | 0.00                   | 0.00                   | 0.00                              | 0.00                   |
| <sup>5</sup> RC1 <sub>acetate,K+</sub>      | 8.06                   | 6.82                              | 6.39                   | 9.45                   | 8.21                              | 7.79                   |
| <sup>5</sup> TS1 <sub>acetate,K+</sub>      | 21.53                  | 17.36                             | 17.69                  | 20.81                  | 16.64                             | 16.97                  |
| <sup>5</sup> IM1 <sub>acetate,K+</sub>      | 10.92                  | 9.66                              | 9.47                   | 7.24                   | 5.99                              | 5.79                   |
| <sup>5</sup> RC2 <sub>acetate,K+</sub>      | 10.92                  | 9.66                              | 9.47                   | 7.24                   | 5.99                              | 5.79                   |
| <sup>5</sup> TS2 <sub>acetate,K+</sub>      | 8.63                   | 3.87                              | 2.11                   | 4.41                   | -0.35                             | -2.11                  |
| <sup>5</sup> IM2 <sub>acetate,K+</sub>      | -4.06                  | -7.38                             | -8.97                  | -9.04                  | -12.37                            | -13.96                 |
| <sup>3</sup> RC1 <sub>acetate, 6W, K+</sub> | 0.00                   | 0.00                              | 0.00                   | 0.00                   | 0.00                              | 0.00                   |
| <sup>3</sup> TS1 <sub>acetate, 6W, K+</sub> | 1.35                   | -0.76                             | -0.31                  | 1.69                   | -0.42                             | 0.03                   |
| <sup>3</sup> IM1 <sub>acetate, 6W, K+</sub> | -1.04                  | -0.34                             | -0.34                  | -2.44                  | -1.74                             | -1.74                  |
| <sup>3</sup> RC2 <sub>acetate, 6W, K+</sub> | -1.04                  | -0.34                             | -0.34                  | -2.44                  | -1.74                             | -1.74                  |
| <sup>3</sup> IM2 <sub>acetate, 6W, K+</sub> | -26.48                 | -27.06                            | -28.40                 | -35.04                 | -35.62                            | -36.96                 |
| <sup>5</sup> RC1 <sub>acetate, 6W, K+</sub> | 13.42                  | 12.71                             | 12.22                  | 12.07                  | 11.36                             | 10.87                  |
| <sup>5</sup> TS1 <sub>acetate, 6W, K+</sub> | 34.98                  | 32.06                             | 32.02                  | 35.47                  | 32.56                             | 32.52                  |
| <sup>5</sup> IM1 <sub>acetate, 6W, K+</sub> | 33.30                  | 33.03                             | 32.58                  | 32.36                  | 32.09                             | 31.64                  |
| <sup>5</sup> RC2 <sub>acetate, 6W, K+</sub> | 33.30                  | 33.03                             | 32.58                  | 32.36                  | 32.09                             | 31.64                  |



**Table S3: Group spin densities (a) and charges (b) of UB3LYP-GD3BJ/BS1 optimized geometries for the CO<sub>2</sub> reduction on an iron-porphyrin center with/without nearby K<sup>+</sup> using H<sub>3</sub>O<sup>+</sup>, phenol or acetate as a proton source as obtained in Gaussian-09.**

a Spin densities

|                                             | H <sub>3</sub> O <sup>+</sup> | CO <sub>2</sub> (H) | Fe   | Lig   | total |
|---------------------------------------------|-------------------------------|---------------------|------|-------|-------|
| <b>H<sub>3</sub>O<sup>+</sup></b>           |                               |                     |      |       |       |
| <sup>2</sup> CAT <sub>H3O+</sub>            |                               |                     | 1.99 | -0.99 | 1.00  |
| <sup>3</sup> CAT <sub>H3O+</sub>            |                               |                     | 2.00 | 0.00  | 2.00  |
| <sup>3</sup> RC1 <sub>H3O+</sub>            | 0.00                          | -0.18               | 1.26 | 0.92  | 2.00  |
| <sup>3</sup> IM1 <sub>H3O+</sub>            | 0.00                          | 0.15                | 2.27 | -0.42 | 2.00  |
| <sup>3</sup> RC2 <sub>H3O+</sub>            | 0.00                          | 0.15                | 2.31 | -0.47 | 2.00  |
| <sup>3</sup> IM2 <sub>H3O+</sub>            | 0.00                          | 0.03                | 2.07 | -0.10 | 2.00  |
| <sup>4</sup> CAT <sub>H3O+</sub>            |                               |                     | 2.17 | 0.83  | 3.00  |
| <sup>5</sup> CAT <sub>H3O+</sub>            |                               |                     | 2.15 | 1.85  | 4.00  |
| <sup>5</sup> RC1 <sub>H3O+</sub>            | 0.00                          | -0.51               | 3.40 | 1.11  | 4.00  |
| <sup>5</sup> IM1 <sub>H3O+</sub>            | 0.00                          | 0.35                | 2.64 | 1.01  | 4.00  |
| <sup>5</sup> RC2 <sub>H3O+</sub>            | 0.00                          | 0.08                | 3.87 | 0.04  | 4.00  |
| <sup>5</sup> IM2 <sub>H3O+</sub>            | 0.00                          | 0.00                | 3.81 | 0.19  | 4.00  |
| <sup>2</sup> CAT <sub>H3O+,K+</sub>         |                               |                     | 1.98 | -0.98 | 1.00  |
| <sup>3</sup> CAT <sub>H3O+,K+</sub>         |                               |                     | 1.99 | 0.01  | 2.00  |
| <sup>3</sup> RC1 <sub>H3O+,K+</sub>         | 0.01                          | -0.16               | 1.27 | 0.89  | 2.00  |
| <sup>3</sup> IM1 <sub>H3O+,K+</sub>         | 0.00                          | 0.12                | 2.09 | -0.21 | 2.00  |
| <sup>3</sup> RC2 <sub>H3O+,K+</sub>         | 0.00                          | 0.13                | 2.20 | -0.33 | 2.00  |
| <sup>3</sup> TS2 <sub>H3O+,K+</sub>         | 0.01                          | -0.06               | 1.53 | 0.52  | 2.00  |
| <sup>3</sup> IM2 <sub>H3O+,K+</sub>         | 0.00                          | 0.05                | 2.06 | -0.11 | 2.00  |
| <sup>4</sup> CAT <sub>H3O+,K+</sub>         |                               |                     | 2.04 | 0.96  | 3.00  |
| <sup>5</sup> CAT <sub>H3O+,K+</sub>         |                               |                     | 2.05 | 1.95  | 4.00  |
| <sup>5</sup> RC1 <sub>H3O+,K+</sub>         | 0.01                          | -0.49               | 3.40 | 1.08  | 4.00  |
| <sup>5</sup> IM1 <sub>H3O+,K+</sub>         | 0.00                          | 0.06                | 3.83 | 0.11  | 4.00  |
| <sup>5</sup> RC2 <sub>H3O+,K+</sub>         | 0.00                          | 0.06                | 3.85 | 0.09  | 4.00  |
| <sup>5</sup> TS2 <sub>H3O+,K+</sub>         | 0.00                          | 0.02                | 3.83 | 0.15  | 4.00  |
| <sup>5</sup> IM2 <sub>H3O+,K+</sub>         | 0.00                          | -0.02               | 3.81 | 0.21  | 4.00  |
| <b>acetate</b>                              |                               |                     |      |       |       |
| <sup>5</sup> RC1 <sub>acetate,K+</sub>      | 0.00                          | -0.44               | 3.31 | 1.13  | 4.00  |
| <sup>5</sup> TS1 <sub>acetate,K+</sub>      | 0.00                          | -0.34               | 3.21 | 1.13  | 4.00  |
| <sup>5</sup> IM1 <sub>acetate,K+</sub>      | 0.00                          | 0.06                | 3.85 | 0.09  | 4.00  |
| <sup>5</sup> RC2 <sub>acetate,K+</sub>      | 0.00                          | 0.05                | 3.84 | 0.11  | 4.00  |
| <sup>5</sup> TS2 <sub>acetate,K+</sub>      | 0.00                          | 0.02                | 3.80 | 0.18  | 4.00  |
| <sup>5</sup> IM2 <sub>acetate,K+</sub>      | 0.00                          | 0.00                | 3.80 | 0.20  | 4.00  |
| <sup>3</sup> RC1 <sub>acetate, 6W, K+</sub> | 0.00                          | -0.17               | 1.25 | 0.91  | 2.00  |
| <sup>3</sup> TS1 <sub>acetate, 6W, K+</sub> | 0.00                          | -0.14               | 1.21 | 0.93  | 2.00  |
| <sup>3</sup> IM1 <sub>acetate, 6W, K+</sub> | 0.00                          | -0.12               | 1.18 | 0.94  | 2.00  |
| <sup>3</sup> RC2 <sub>acetate, 6W, K+</sub> | 0.00                          | -0.15               | 1.24 | 0.91  | 2.00  |
| <sup>3</sup> IM2 <sub>acetate, 6W, K+</sub> | 0.00                          | 0.04                | 2.06 | -0.10 | 2.00  |
| <sup>5</sup> RC1 <sub>acetate, 6W, K+</sub> | 0.00                          | 0.41                | 2.56 | 1.03  | 4.00  |
| <sup>5</sup> TS1 <sub>acetate, 6W, K+</sub> | 0.00                          | -0.21               | 1.40 | 2.80  | 4.00  |
| <sup>5</sup> IM1 <sub>acetate, 6W, K+</sub> | 0.00                          | -0.16               | 1.29 | 2.86  | 4.00  |

b Charges

|                                    | H <sub>3</sub> O <sup>+</sup> | CO <sub>2</sub> (H) | Fe   | Lig   | total |
|------------------------------------|-------------------------------|---------------------|------|-------|-------|
| <b>H<sub>3</sub>O<sup>+</sup>:</b> |                               |                     |      |       |       |
| <sup>2</sup> CAT <sub>H3O+</sub>   |                               |                     | 0.55 | -1.55 | -1.00 |
| <sup>3</sup> CAT <sub>H3O+</sub>   |                               |                     | 0.48 | -2.48 | -2.00 |
| <sup>3</sup> RC1 <sub>H3O+</sub>   | 0.72                          | -0.53               | 0.45 | -1.65 | -1.00 |
| <sup>3</sup> IM1 <sub>H3O+</sub>   | 0.22                          | -0.56               | 0.56 | -1.22 | -1.00 |
| <sup>3</sup> RC2 <sub>H3O+</sub>   | 0.74                          | -0.32               | 0.57 | -0.99 | 0.00  |
| <sup>3</sup> IM2 <sub>H3O+</sub>   | 0.22                          | -0.09               | 0.60 | -0.73 | 0.00  |
| <sup>4</sup> CAT <sub>H3O+</sub>   |                               |                     | 0.70 | -1.70 | -1.00 |
| <sup>5</sup> CAT <sub>H3O+</sub>   |                               |                     | 0.65 | -2.65 | -2.00 |

|                                             |       |       |      |       |       |
|---------------------------------------------|-------|-------|------|-------|-------|
| <sup>5</sup> RC1 <sub>H3O+</sub>            | 0.72  | -0.50 | 0.61 | -1.82 | -1.00 |
| <sup>5</sup> IM1 <sub>H3O+</sub>            | 0.25  | -0.47 | 0.62 | -1.39 | -1.00 |
| <sup>5</sup> RC2 <sub>H3O+</sub>            | 0.74  | -0.39 | 0.67 | -1.03 | 0.00  |
| <sup>5</sup> IM2 <sub>H3O+</sub>            | 0.27  | -0.07 | 0.72 | -0.92 | 0.00  |
| <sup>2</sup> CAT <sub>H3O+,K+</sub>         |       |       | 0.55 | -0.55 | 0.00  |
| <sup>3</sup> CAT <sub>H3O+,K+</sub>         |       |       | 0.48 | -1.48 | -1.00 |
| <sup>3</sup> RC1 <sub>H3O+,K+</sub>         | 0.65  | -0.51 | 0.47 | -0.61 | 0.00  |
| <sup>3</sup> IM1 <sub>H3O+,K+</sub>         | 0.27  | -0.55 | 0.55 | -0.26 | 0.00  |
| <sup>3</sup> RC2 <sub>H3O+,K+</sub>         | 0.78  | -0.31 | 0.59 | -0.05 | 1.00  |
| <sup>3</sup> TS2 <sub>H3O+,K+</sub>         | 0.69  | -0.11 | 0.49 | -0.07 | 1.00  |
| <sup>3</sup> IM2 <sub>H3O+,K+</sub>         | 0.26  | -0.07 | 0.61 | 0.20  | 1.00  |
| <sup>4</sup> CAT <sub>H3O+,K+</sub>         |       |       | 0.58 | -0.58 | 0.00  |
| <sup>5</sup> CAT <sub>H3O+,K+</sub>         |       |       | 0.52 | -1.52 | -1.00 |
| <sup>5</sup> RC1 <sub>H3O+,K+</sub>         | 0.67  | -0.48 | 0.62 | -0.81 | 0.00  |
| <sup>5</sup> IM1 <sub>H3O+,K+</sub>         | 0.28  | -0.58 | 0.66 | -0.36 | 0.00  |
| <sup>5</sup> RC2 <sub>H3O+,K+</sub>         | 0.77  | -0.32 | 0.68 | -0.13 | 1.00  |
| <sup>5</sup> TS2 <sub>H3O+,K+</sub>         | 0.65  | -0.28 | 0.68 | -0.05 | 1.00  |
| <sup>5</sup> IM2 <sub>H3O+,K+</sub>         | 0.26  | -0.05 | 0.72 | 0.07  | 1.00  |
| <b>Acetate:</b>                             |       |       |      |       |       |
| <sup>5</sup> RC1 <sub>acetate,K+</sub>      | -0.10 | -0.46 | 0.57 | -1.02 | -1.00 |
| <sup>5</sup> TS1 <sub>acetate,K+</sub>      | -0.38 | -0.33 | 0.57 | -0.86 | -1.00 |
| <sup>5</sup> IM1 <sub>acetate,K+</sub>      | -0.49 | -0.64 | 0.65 | -0.52 | -1.00 |
| <sup>5</sup> RC2 <sub>acetate,K+</sub>      | -0.01 | -0.32 | 0.66 | -0.32 | 0.00  |
| <sup>5</sup> TS2 <sub>acetate,K+</sub>      | -0.07 | -0.30 | 0.67 | -0.30 | 0.00  |
| <sup>5</sup> IM2 <sub>acetate,K+</sub>      | -0.36 | -0.06 | 0.70 | -0.28 | 0.00  |
| <sup>3</sup> RC1 <sub>acetate, 6W, K+</sub> | -0.03 | -0.50 | 0.44 | -0.91 | -1.00 |
| <sup>3</sup> TS1 <sub>acetate, 6W, K+</sub> | -0.15 | -0.43 | 0.44 | -0.87 | -1.00 |
| <sup>3</sup> IM1 <sub>acetate, 6W, K+</sub> | -0.34 | -0.29 | 0.44 | -0.82 | -1.00 |
| <sup>3</sup> RC2 <sub>acetate, 6W, K+</sub> | 0.05  | -0.02 | 0.46 | -0.49 | 0.00  |
| <sup>3</sup> IM2 <sub>acetate, 6W, K+</sub> | -0.47 | -0.11 | 0.58 | -0.01 | 0.00  |
| <sup>5</sup> RC1 <sub>acetate, 6W, K+</sub> | -0.05 | -0.66 | 0.58 | -0.87 | -1.00 |
| <sup>5</sup> TS1 <sub>acetate, 6W, K+</sub> | -0.16 | -0.39 | 0.46 | -0.92 | -1.00 |
| <sup>5</sup> IM1 <sub>acetate, 6W, K+</sub> | -0.33 | -0.27 | 0.46 | -0.86 | -1.00 |

**Table S4: Absolute energies and free energies (in au) for UB3LYP/BS1 optimized geometries for CO<sub>2</sub> reduction on an iron-porphyrin center with nearby K<sup>+</sup> using H<sub>3</sub>O<sup>+</sup> as a proton source.**

|                                     | E [au, BS1]  | ZPE      | G            | E [au,BS2]   |
|-------------------------------------|--------------|----------|--------------|--------------|
| <sup>3</sup> CAT <sub>H3O+,K+</sub> | -5186.942526 | 1.057999 | -5185.991308 | -5190.801361 |
| <sup>3</sup> RC1 <sub>H3O+,K+</sub> | -5452.216713 | 1.111464 | -5451.211828 | -5456.379711 |
| <sup>3</sup> IM1 <sub>H3O+,K+</sub> | -5452.246950 | 1.112348 | -5451.246724 | -5456.416558 |
| <sup>3</sup> RC2 <sub>H3O+,K+</sub> | -5452.646236 | 1.122733 | -5451.635105 | -5456.810513 |
| <sup>3</sup> TS2 <sub>H3O+,K+</sub> | -5452.657027 | 1.121953 | -5451.646329 | -5456.818193 |
| <sup>3</sup> IM2 <sub>H3O+,K+</sub> | -5452.715820 | 1.122009 | -5451.709326 | -5456.887664 |
| <sup>5</sup> CAT <sub>H3O+,K+</sub> | -5186.934014 | 1.059161 | -5185.981996 | -5190.792326 |
| <sup>5</sup> RC1 <sub>H3O+,K+</sub> | -5452.210413 | 1.109122 | -5451.210337 | -5456.372956 |
| <sup>5</sup> IM1 <sub>H3O+,K+</sub> | -5452.253399 | 1.110935 | -5451.254863 | -5456.421439 |
| <sup>5</sup> RC2 <sub>H3O+,K+</sub> | -5452.650026 | 1.120547 | -5451.644121 | -5456.813508 |
| <sup>5</sup> TS2 <sub>H3O+,K+</sub> | -5452.665182 | 1.119849 | -5451.657255 | -5456.826934 |
| <sup>5</sup> IM2 <sub>H3O+,K+</sub> | -5452.712124 | 1.120077 | -5451.708877 | -5456.881115 |

**Table S5: Relative (free) energies (in kcal mol<sup>-1</sup>) of the CO<sub>2</sub> reduction on an iron-porphyrin center with nearby K<sup>+</sup> using H<sub>3</sub>O<sup>+</sup> as a proton source as obtained with UB3LYP in Gaussian-09.**

|                                     | $\Delta E(\text{BS1})$ | $\Delta E + \text{ZPE}$ | $\Delta G(\text{BS1})$ | $\Delta E(\text{BS2})$ | $\Delta E + \text{ZPE}$ | $\Delta G(\text{BS2})$ |
|-------------------------------------|------------------------|-------------------------|------------------------|------------------------|-------------------------|------------------------|
| <sup>3</sup> RC1 <sub>H3O+,K+</sub> | 0.00                   | 0.00                    | 0.00                   | 0.00                   | 0.00                    | 0.00                   |
| <sup>3</sup> IM1 <sub>H3O+,K+</sub> | -18.97                 | -18.42                  | -21.90                 | -23.12                 | -22.57                  | -26.05                 |
| <sup>3</sup> RC2 <sub>H3O+,K+</sub> | -18.97                 | -18.42                  | -21.90                 | -23.12                 | -22.57                  | -26.05                 |
| <sup>3</sup> TS2 <sub>H3O+,K+</sub> | -25.75                 | -25.68                  | -28.94                 | -27.94                 | -27.88                  | -31.14                 |
| <sup>3</sup> IM2 <sub>H3O+,K+</sub> | -62.64                 | -62.54                  | -68.47                 | -71.54                 | -71.43                  | -77.37                 |
| <sup>5</sup> RC1 <sub>H3O+,K+</sub> | 3.95                   | 2.48                    | 0.94                   | 4.24                   | 2.77                    | 1.22                   |
| <sup>5</sup> IM1 <sub>H3O+,K+</sub> | -23.02                 | -23.35                  | -27.00                 | -26.18                 | -26.52                  | -30.17                 |
| <sup>5</sup> RC2 <sub>H3O+,K+</sub> | -23.02                 | -23.35                  | -27.00                 | -26.18                 | -26.52                  | -30.17                 |
| <sup>5</sup> TS2 <sub>H3O+,K+</sub> | -32.53                 | -33.30                  | -35.25                 | -34.61                 | -35.38                  | -37.32                 |
| <sup>5</sup> IM2 <sub>H3O+,K+</sub> | -61.99                 | -62.61                  | -67.64                 | -68.61                 | -69.24                  | -74.26                 |

**Table S6: Group spin densities (a) and charges (b) of UB3LYP/BS1 optimized geometries for the CO<sub>2</sub> reduction on an iron-porphyrin center with nearby K<sup>+</sup> using H<sub>3</sub>O<sup>+</sup> as a proton source as obtained in Gaussian-09.**

a Spin densities

|                                     | H <sub>3</sub> O <sup>+</sup> | CO <sub>2</sub> (H) | Fe   | Lig   | total |
|-------------------------------------|-------------------------------|---------------------|------|-------|-------|
| <sup>3</sup> CAT <sub>H3O+,K+</sub> |                               |                     | 2.00 | 0.00  | 2.00  |
| <sup>3</sup> RC1 <sub>H3O+,K+</sub> | 0.00                          | -0.21               | 1.31 | 0.89  | 2.00  |
| <sup>3</sup> IM1 <sub>H3O+,K+</sub> | 0.00                          | 0.10                | 2.14 | -0.24 | 2.00  |
| <sup>3</sup> RC2 <sub>H3O+,K+</sub> | 0.00                          | 0.12                | 2.17 | -0.28 | 2.00  |
| <sup>3</sup> TS2 <sub>H3O+,K+</sub> | 0.00                          | -0.08               | 1.46 | 0.62  | 2.00  |
| <sup>3</sup> IM2 <sub>H3O+,K+</sub> | 0.00                          | 0.04                | 2.08 | -0.12 | 2.00  |
| <sup>5</sup> CAT <sub>H3O+,K+</sub> |                               |                     | 2.05 | 1.95  | 4.00  |
| <sup>5</sup> RC1 <sub>H3O+,K+</sub> | 0.00                          | -0.54               | 3.47 | 1.07  | 4.00  |
| <sup>5</sup> IM1 <sub>H3O+,K+</sub> | 0.00                          | 0.04                | 3.85 | 0.11  | 4.00  |
| <sup>5</sup> RC2 <sub>H3O+,K+</sub> | 0.00                          | 0.05                | 3.85 | 0.10  | 4.00  |
| <sup>5</sup> TS2 <sub>H3O+,K+</sub> | 0.00                          | 0.01                | 3.83 | 0.16  | 4.00  |
| <sup>5</sup> IM2 <sub>H3O+,K+</sub> | 0.00                          | -0.01               | 3.82 | 0.20  | 4.00  |

b Charges

|                                     | H <sub>3</sub> O <sup>+</sup> | CO <sub>2</sub> (H) | Fe   | Lig   | total |
|-------------------------------------|-------------------------------|---------------------|------|-------|-------|
| <sup>3</sup> CAT <sub>H3O+,K+</sub> |                               |                     | 0.51 | -1.51 | -1.00 |
| <sup>3</sup> RC1 <sub>H3O+,K+</sub> | 0.67                          | -0.53               | 0.48 | -0.62 | 0.00  |
| <sup>3</sup> IM1 <sub>H3O+,K+</sub> | 0.27                          | -0.60               | 0.58 | -0.25 | 0.00  |
| <sup>3</sup> RC2 <sub>H3O+,K+</sub> | 0.76                          | -0.34               | 0.60 | -0.02 | 1.00  |
| <sup>3</sup> TS2 <sub>H3O+,K+</sub> | 0.70                          | -0.09               | 0.50 | -0.11 | 1.00  |
| <sup>3</sup> IM2 <sub>H3O+,K+</sub> | 0.24                          | -0.09               | 0.66 | 0.19  | 1.00  |
| <sup>5</sup> CAT <sub>H3O+,K+</sub> |                               |                     | 0.53 | -1.53 | -1.00 |
| <sup>5</sup> RC1 <sub>H3O+,K+</sub> | 0.68                          | -0.52               | 0.65 | -0.81 | 0.00  |
| <sup>5</sup> IM1 <sub>H3O+,K+</sub> | 0.27                          | -0.62               | 0.69 | -0.34 | 0.00  |
| <sup>5</sup> RC2 <sub>H3O+,K+</sub> | 0.76                          | -0.35               | 0.70 | -0.12 | 1.00  |
| <sup>5</sup> TS2 <sub>H3O+,K+</sub> | 0.64                          | -0.31               | 0.70 | -0.03 | 1.00  |
| <sup>5</sup> IM2 <sub>H3O+,K+</sub> | 0.25                          | -0.05               | 0.73 | 0.06  | 1.00  |

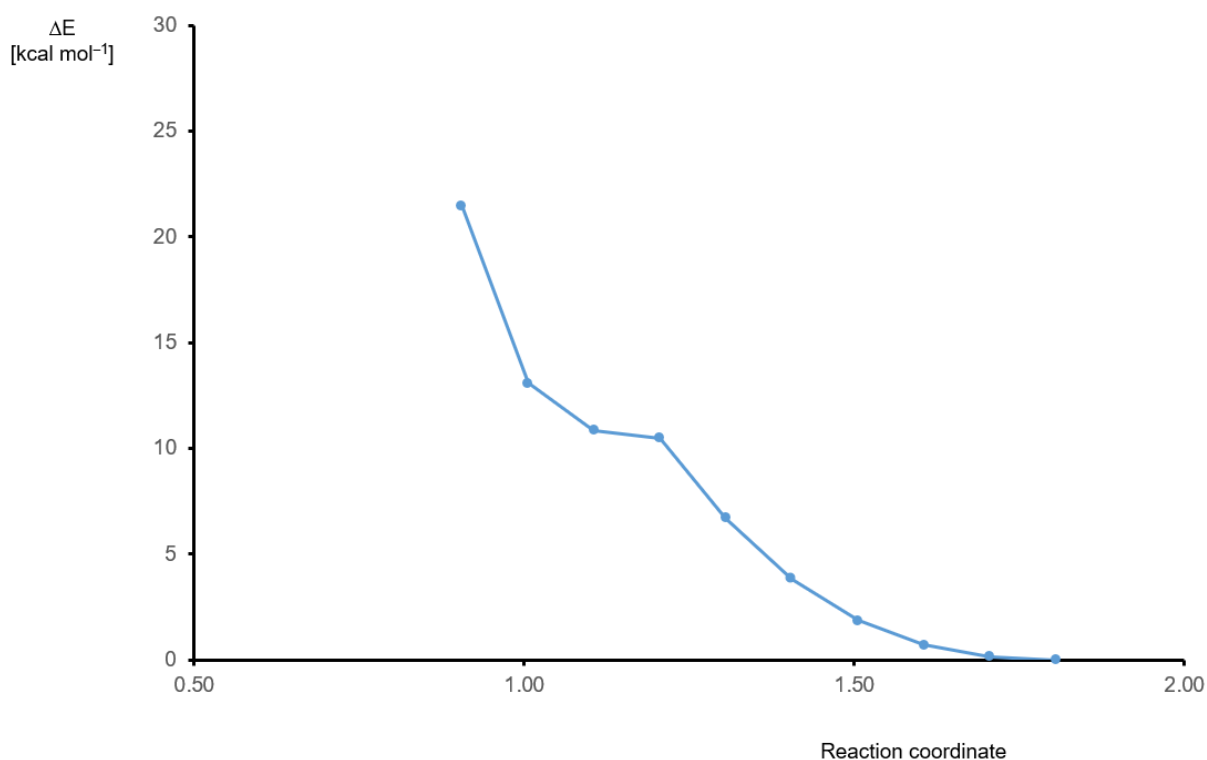

**Fig. S5:** UB3LYP-GD3BJ /BS1 calculated geometry scan for the O–H distance starting from  ${}^3\text{IM1}_{\text{H3O}^+}$  on the right-hand-side to  ${}^3\text{RC1}_{\text{H3O}^+}$ . As can be seen no proton transfer barrier is encountered for the pathway from  ${}^3\text{RC1}_{\text{H3O}^+}$  to  ${}^3\text{IM1}_{\text{H3O}^+}$ .

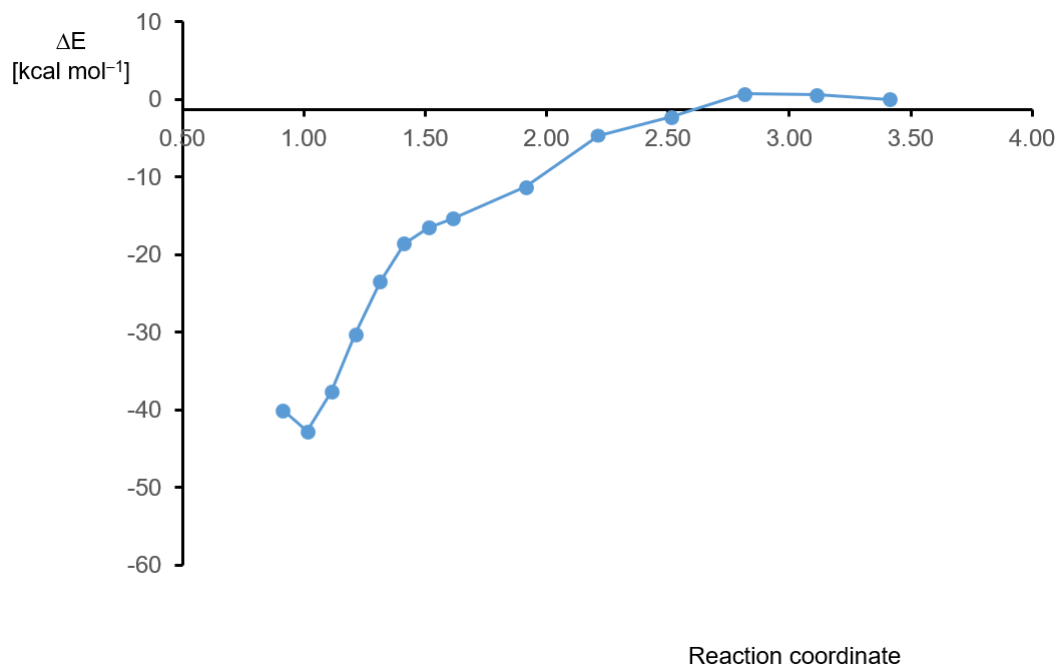

**Fig. S6:** UB3LYP-GD3BJ /BS1 calculated geometry scan for the O–H distance starting from  ${}^3\text{RC2}_{\text{H3O}^+}$  on the right-hand-side to  ${}^3\text{IM2}_{\text{H3O}^+}$ . As can be seen a negligible proton transfer barrier is encountered for the pathway from  ${}^3\text{RC2}_{\text{H3O}^+}$  to  ${}^3\text{IM2}_{\text{H3O}^+}$ .

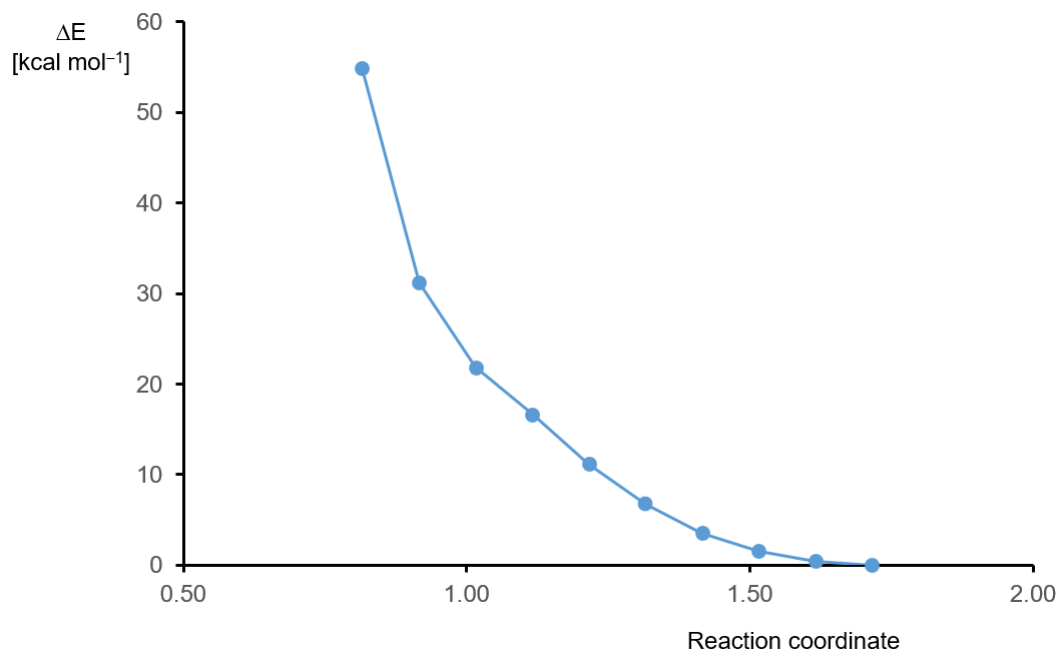

**Fig. S7:** UB3LYP-GD3BJ /BS1 calculated geometry scan for the O–H distance starting from  ${}^5\text{IM1}_{\text{H3O}^+}$  on the right-hand-side to  ${}^5\text{RC1}_{\text{H3O}^+}$ . As can be seen no proton transfer barrier is encountered for the pathway from  ${}^5\text{RC1}_{\text{H3O}^+}$  to  ${}^5\text{IM1}_{\text{H3O}^+}$ .

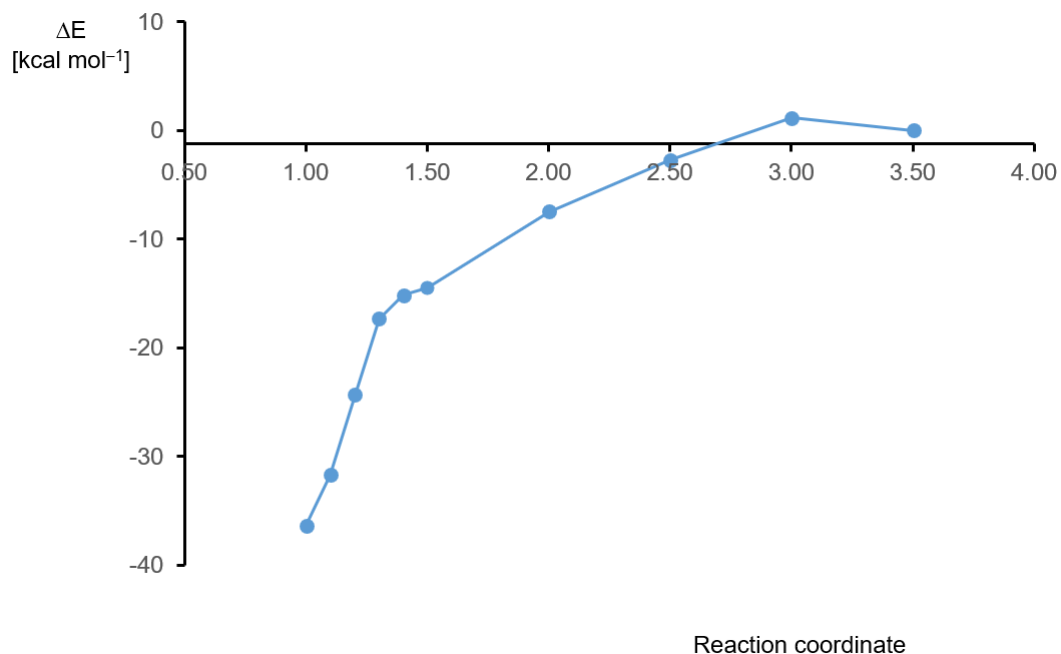

**Fig. S8:** UB3LYP-GD3BJ /BS1 calculated geometry scan for the O–H distance starting from  ${}^5\text{RC2}_{\text{H3O}^+}$  on the right-hand-side to  ${}^5\text{IM2}_{\text{H3O}^+}$ . As can be seen a negligible proton transfer barrier is encountered for the pathway from  ${}^5\text{RC2}_{\text{H3O}^+}$  to  ${}^5\text{IM2}_{\text{H3O}^+}$ .

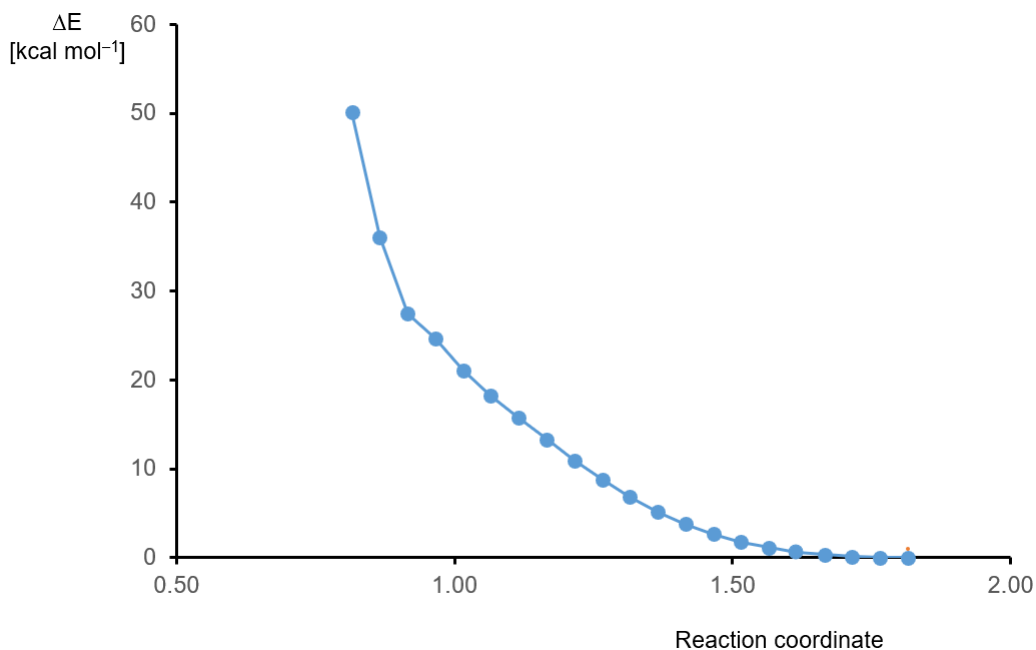

**Fig. S9:** UB3LYP-GD3BJ /BS1 calculated geometry scan for the O–H distance starting from  ${}^3\text{IM1}_{\text{H}_3\text{O}^+, \text{K}^+}$  on the right-hand-side to  ${}^3\text{RC1}_{\text{H}_3\text{O}^+, \text{K}^+}$ . As can be seen no proton transfer barrier is encountered for the pathway from  ${}^3\text{RC1}_{\text{H}_3\text{O}^+, \text{K}^+}$  to  ${}^3\text{IM1}_{\text{H}_3\text{O}^+, \text{K}^+}$  (with nearby  $\text{K}^+$ ).

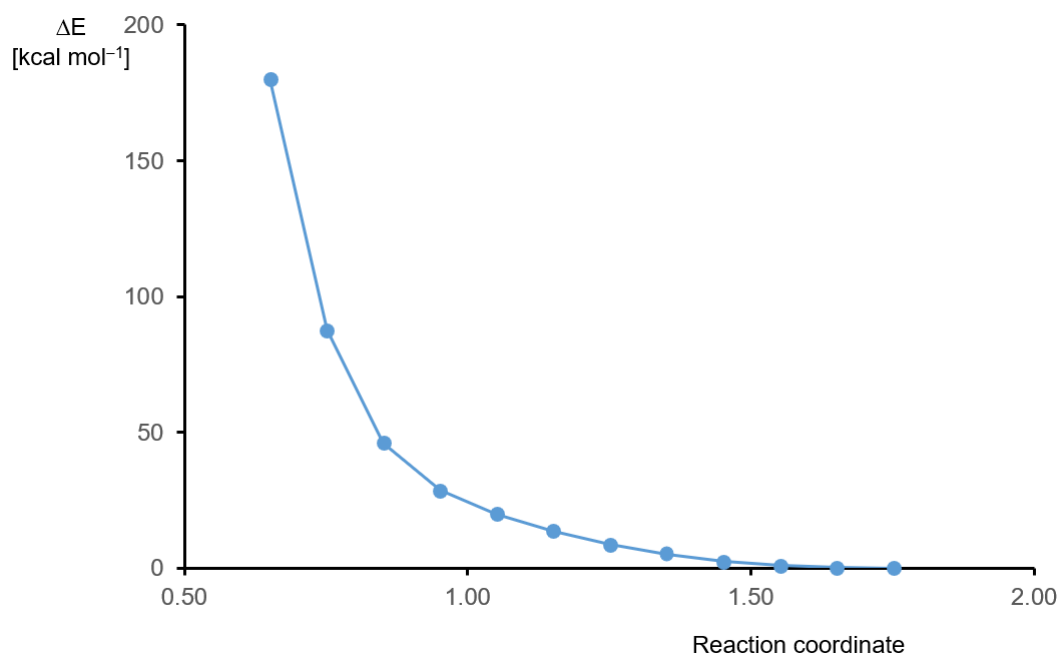

**Fig. S10:** UB3LYP-GD3BJ /BS1 calculated geometry scan for the O–H distance starting from  ${}^5\text{IM1}_{\text{H}_3\text{O}^+, \text{K}^+}$  on the right-hand-side to  ${}^5\text{RC1}_{\text{H}_3\text{O}^+, \text{K}^+}$ . As can be seen no proton transfer barrier is encountered for the pathway from  ${}^5\text{RC1}_{\text{H}_3\text{O}^+, \text{K}^+}$  to  ${}^5\text{IM1}_{\text{H}_3\text{O}^+, \text{K}^+}$  (with nearby  $\text{K}^+$ ).

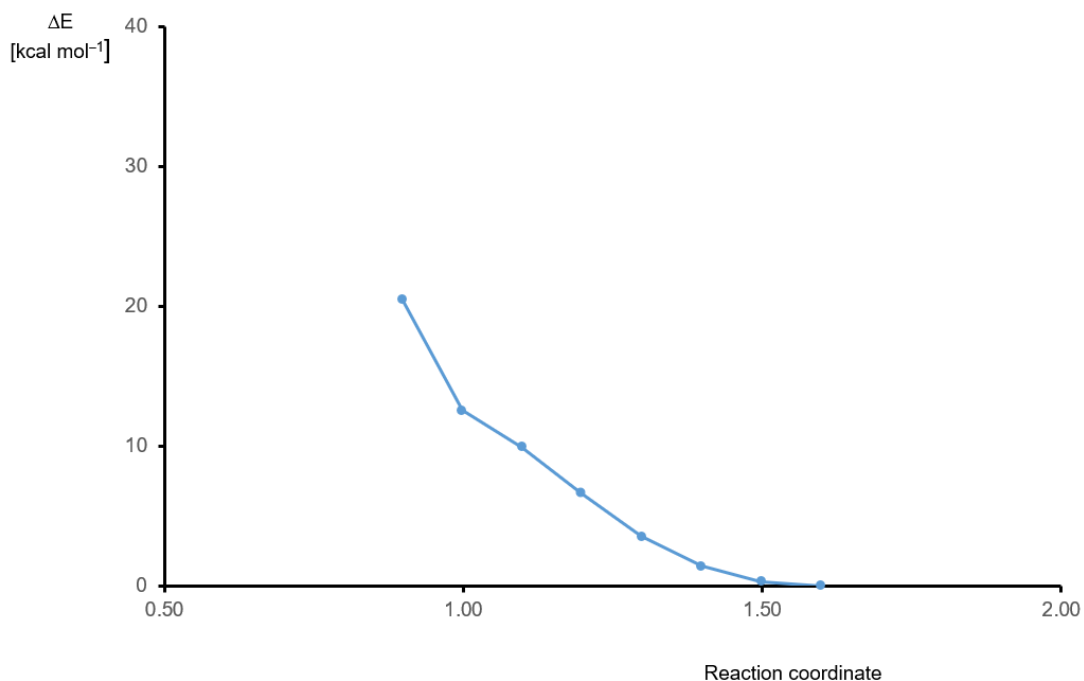

**Fig. S11:** UB3LYP-GD3BJ /BS1 calculated geometry scan for the O–H distance starting from  ${}^3\text{IM1}_{\text{phenol},\text{K}^+}$  on the right-hand-side to  ${}^3\text{RC1}_{\text{phenol},\text{K}^+}$ . As can be seen no proton transfer barrier is encountered for the pathway from  ${}^3\text{RC1}_{\text{phenol},\text{K}^+}$  to  ${}^3\text{IM1}_{\text{phenol},\text{K}^+}$  (with nearby  $\text{K}^+$ ).

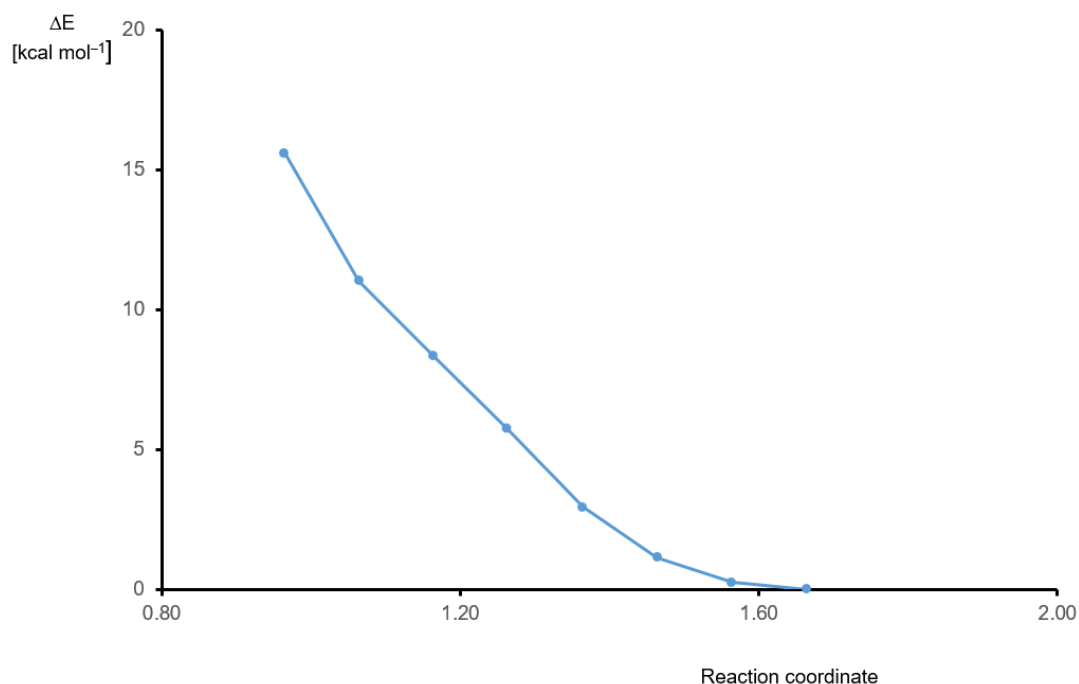

**Fig. S12:** UB3LYP-GD3BJ /BS1 calculated geometry scan for the O–H distance starting from  ${}^5\text{IM1}_{\text{phenol},\text{K}^+}$  on the right-hand-side to  ${}^5\text{RC1}_{\text{phenol},\text{K}^+}$ . As can be seen no proton transfer barrier is encountered for the pathway from  ${}^5\text{RC1}_{\text{phenol},\text{K}^+}$  to  ${}^5\text{IM1}_{\text{phenol},\text{K}^+}$  (with nearby  $\text{K}^+$ ).



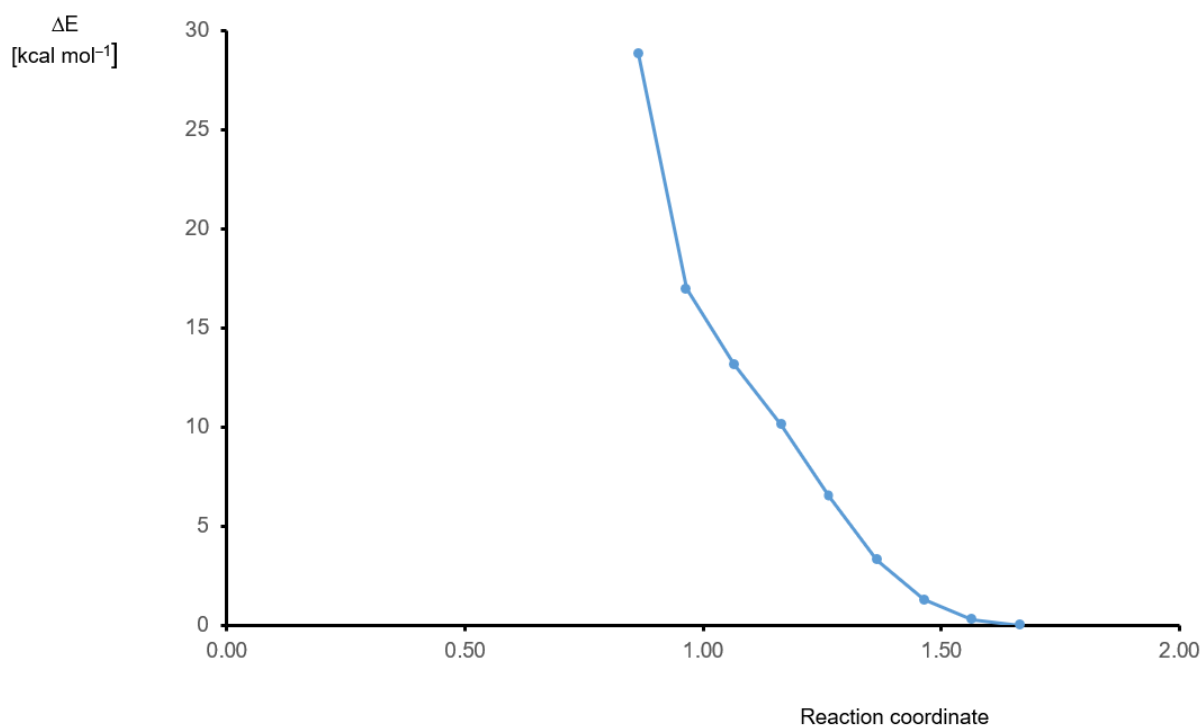

**Fig. S13:** UB3LYP-GD3BJ /BS1 calculated geometry scan for the O–H distance starting from  ${}^3\text{IM1}_{\text{phenol, 6W, K}^+}$  on the right-hand-side to  ${}^3\text{RC1}_{\text{phenol, 6W, K}^+}$ . As can be seen no proton transfer barrier is encountered for the pathway from  ${}^3\text{RC1}_{\text{phenol, 6W, K}^+}$  to  ${}^3\text{IM1}_{\text{phenol, 6W, K}^+}$  (with nearby  $\text{K}^+$ ).

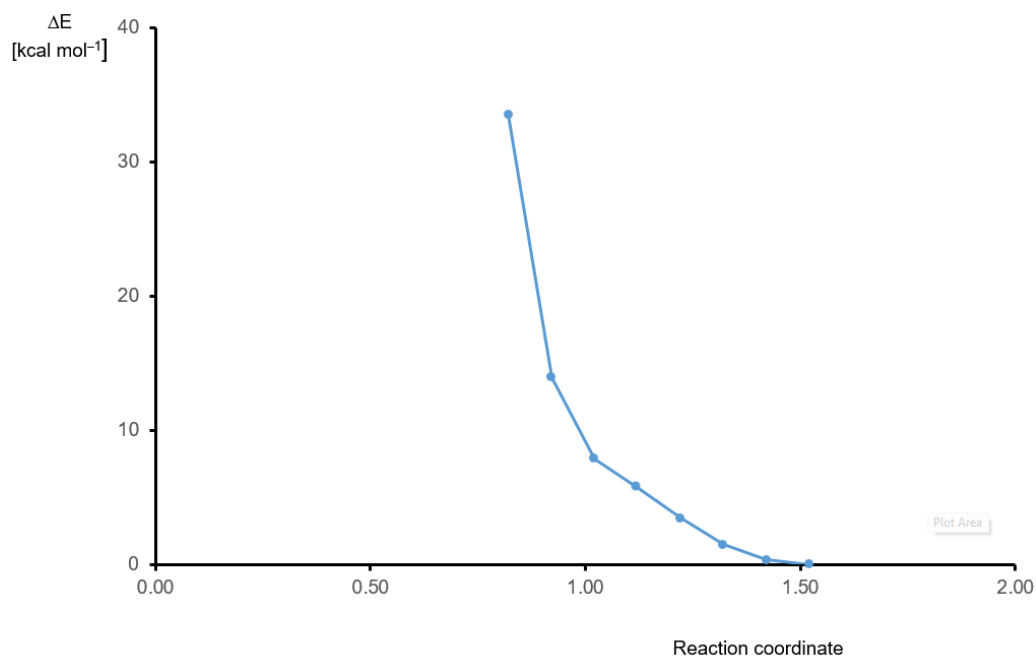

**Fig. S14:** UB3LYP-GD3BJ /BS1 calculated geometry scan for the O–H distance starting from  ${}^3\text{IM1}_{\text{acetate},\text{K}^+}$  on the right-hand-side to  ${}^3\text{RC1}_{\text{acetate},\text{K}^+}$ . As can be seen no proton transfer barrier is encountered for the pathway from  ${}^3\text{RC1}_{\text{acetate},\text{K}^+}$  to  ${}^3\text{IM1}_{\text{acetate},\text{K}^+}$  (with nearby  $\text{K}^+$ ).

## Cartesian coordinates of optimized geometries:

|                                                             |              |              |              |              |              |              |              |
|-------------------------------------------------------------|--------------|--------------|--------------|--------------|--------------|--------------|--------------|
| <b>CO<sub>2</sub> reduction on an iron-porphyrin center</b> |              |              | 1            | 1.024033000  | -4.771121000 | -0.868120000 |              |
| <b>with/without nearby K<sup>+</sup></b>                    |              |              | 1            | -1.662453000 | -4.883425000 | -0.866047000 |              |
| <b>UB3LYP/GD3BJ:</b>                                        |              |              | 1            | 4.426644000  | -1.051563000 | -2.700947000 |              |
| <b><sup>2</sup>CAT<sub>H3O+</sub>:</b>                      |              |              | 1            | 4.319349000  | 1.657830000  | -2.860535000 |              |
| 6                                                           | 3.911110000  | 3.755722000  | -1.074495000 | 1            | 0.725167000  | 5.256397000  | -1.243103000 |
| 6                                                           | 2.843461000  | 3.770836000  | -1.993041000 | 1            | -1.897141000 | 5.133514000  | -0.636420000 |
| 6                                                           | 2.782592000  | 4.813368000  | -2.932994000 | 1            | -5.587303000 | 1.400824000  | -1.353163000 |
| 6                                                           | 3.755427000  | 5.817567000  | -2.954943000 | 1            | -5.541816000 | -1.286150000 | -1.737621000 |
| 6                                                           | 4.808882000  | 5.794680000  | -2.035983000 | 1            | 2.240009000  | -4.402517000 | -3.160819000 |
| 6                                                           | 4.881900000  | 4.759681000  | -1.096332000 | 1            | 4.087410000  | -6.064722000 | -3.208477000 |
| 6                                                           | 1.803229000  | 2.703837000  | -1.944282000 | 1            | 6.062626000  | -5.756008000 | -1.697117000 |
| 6                                                           | 2.228640000  | 1.364380000  | -2.122131000 | 1            | 6.147235000  | -3.819344000 | -0.160585000 |
| 7                                                           | 1.471141000  | 0.239654000  | -1.824249000 | 1            | 1.963800000  | 4.830152000  | -3.655847000 |
| 6                                                           | 2.319411000  | -0.838164000 | -1.979478000 | 1            | 3.692124000  | 6.618016000  | -3.696452000 |
| 6                                                           | 3.588465000  | -0.402267000 | -2.460627000 | 1            | 5.570065000  | 6.578593000  | -2.052184000 |
| 6                                                           | 3.532041000  | 0.977261000  | -2.547151000 | 1            | 5.699504000  | 4.734879000  | -0.371164000 |
| 26                                                          | -0.517416000 | 0.171098000  | -1.573527000 | 1            | 3.975116000  | 2.955749000  | -0.333886000 |
| 7                                                           | -0.586416000 | 2.173897000  | -1.552937000 | 1            | -4.099832000 | 4.741198000  | -2.137770000 |
| 6                                                           | -1.670258000 | 2.950524000  | -1.164387000 | 1            | -5.878048000 | 6.201212000  | -1.175567000 |
| 6                                                           | -1.249554000 | 4.325728000  | -0.966489000 | 1            | -6.819790000 | 5.675671000  | 1.079973000  |
| 6                                                           | 0.073562000  | 4.387478000  | -1.277316000 | 1            | -5.960572000 | 3.733625000  | 2.365076000  |
| 6                                                           | 0.494630000  | 3.048594000  | -1.640032000 | 1            | -6.605700000 | -4.576471000 | 0.276936000  |
| 6                                                           | -2.972434000 | 2.504931000  | -0.998884000 | 1            | -6.470594000 | -6.400015000 | -1.423562000 |
| 6                                                           | -4.014752000 | 3.415805000  | -0.450703000 | 1            | -4.676967000 | -6.331780000 | -3.161137000 |
| 6                                                           | -4.557059000 | 3.139452000  | 0.828753000  | 1            | -3.039873000 | -4.464875000 | -3.185023000 |
| 6                                                           | -5.561836000 | 3.947393000  | 1.372152000  | 1            | 6.218582000  | -1.956895000 | 0.784942000  |
| 6                                                           | -6.036702000 | 5.047523000  | 0.648620000  | 1            | 5.887943000  | -0.943277000 | -0.649547000 |
| 6                                                           | -5.508000000 | 5.343933000  | -0.608955000 | 1            | -4.657250000 | 1.663327000  | 3.437081000  |
| 6                                                           | -4.505757000 | 4.527900000  | -1.146328000 | 1            | -5.877073000 | 1.413144000  | 2.153412000  |
| 6                                                           | 2.001345000  | -2.182062000 | -1.647565000 | 7            | -3.202684000 | -0.581931000 | 2.485750000  |
| 6                                                           | 3.110285000  | -3.174211000 | -1.628432000 | 8            | -0.119706000 | 1.480204000  | 2.470522000  |
| 6                                                           | 3.092312000  | -4.286394000 | -2.488583000 | 8            | -0.531129000 | -2.236572000 | 2.396358000  |
| 6                                                           | 4.132953000  | -5.216760000 | -2.521588000 | 8            | 2.982375000  | 2.128397000  | 2.105455000  |
| 6                                                           | 5.235909000  | -5.041954000 | -1.683423000 | 8            | 2.190970000  | -1.479387000 | 2.932426000  |
| 6                                                           | 5.287762000  | -3.944947000 | -0.819593000 | 6            | -1.784032000 | -2.662722000 | 2.886552000  |
| 6                                                           | 4.236116000  | -3.020839000 | -0.783823000 | 1            | -1.853975000 | -2.503711000 | 3.980778000  |
| 8                                                           | 4.240647000  | -1.962273000 | 0.088325000  | 6            | -2.916889000 | -1.983323000 | 2.144139000  |
| 6                                                           | 5.475595000  | -1.296267000 | 0.305761000  | 1            | -1.905328000 | -3.747382000 | 2.707867000  |
| 6                                                           | 5.273024000  | -0.054219000 | 1.175201000  | 1            | -3.837195000 | -2.547145000 | 2.338736000  |
| 7                                                           | 4.790899000  | -0.224046000 | 2.440082000  | 1            | -2.714814000 | -2.066985000 | 1.064476000  |
| 8                                                           | -4.017933000 | 2.081608000  | 1.498248000  | 6            | 0.511210000  | -3.174785000 | 2.544051000  |
| 6                                                           | -4.810441000 | 1.323123000  | 2.397928000  | 1            | 0.614616000  | -3.490600000 | 3.601375000  |
| 6                                                           | -4.470771000 | -0.161328000 | 2.224598000  | 1            | 0.303273000  | -4.077712000 | 1.937403000  |
| 8                                                           | -5.356984000 | -0.927202000 | 1.844945000  | 6            | 1.795887000  | -2.537683000 | 2.065824000  |
| 7                                                           | -0.444993000 | -1.818254000 | -1.516772000 | 1            | 2.585046000  | -3.302034000 | 1.989768000  |
| 6                                                           | 0.697217000  | -2.601840000 | -1.405449000 | 1            | 1.649402000  | -2.116912000 | 1.061542000  |
| 6                                                           | 0.325426000  | -3.964825000 | -1.073080000 | 6            | 3.296350000  | -1.725578000 | 3.778159000  |
| 6                                                           | -1.034460000 | -4.021327000 | -1.073687000 | 1            | 3.191115000  | -1.033431000 | 4.625746000  |
| 6                                                           | -1.523130000 | -2.691359000 | -1.374711000 | 1            | 3.266927000  | -2.749480000 | 4.193272000  |
| 6                                                           | -2.870355000 | -2.361882000 | -1.482976000 | 6            | 4.634658000  | -1.531654000 | 3.071505000  |
| 6                                                           | -3.878598000 | -3.460913000 | -1.466804000 | 1            | 5.435716000  | -1.681313000 | 3.819472000  |
| 6                                                           | -4.902982000 | -3.505378000 | -0.500486000 | 1            | 4.745914000  | -2.311982000 | 2.314062000  |
| 6                                                           | -5.823933000 | -4.555953000 | -0.486913000 | 6            | -2.133636000 | 0.286802000  | 2.967935000  |
| 6                                                           | -5.748281000 | -5.580096000 | -1.437329000 | 6            | -1.178085000 | 0.736905000  | 1.870031000  |
| 6                                                           | -4.742129000 | -5.543009000 | -2.407369000 | 1            | -2.569136000 | 1.172158000  | 3.446801000  |
| 6                                                           | -3.819650000 | -4.493496000 | -2.421011000 | 1            | -1.562559000 | -0.242680000 | 3.741152000  |
| 7                                                           | -2.512579000 | 0.094157000  | -1.394383000 | 1            | -1.718102000 | 1.364052000  | 1.147095000  |
| 6                                                           | -3.326865000 | -1.022146000 | -1.544248000 | 1            | -0.769714000 | -0.135417000 | 1.337286000  |
| 6                                                           | -4.694161000 | -0.621588000 | -1.598835000 | 6            | 0.599446000  | 2.226797000  | 1.497714000  |
| 6                                                           | -4.719996000 | 0.746453000  | -1.401243000 | 1            | -0.073609000 | 2.985323000  | 1.064939000  |
| 6                                                           | -3.365221000 | 1.167370000  | -1.267124000 | 6            | 1.818540000  | 2.932138000  | 2.053680000  |
| 8                                                           | 5.602847000  | 1.040309000  | 0.727608000  | 1            | 0.919603000  | 1.567683000  | 0.673727000  |
| 1                                                           | -4.977090000 | -2.712982000 | 0.246027000  | 1            | 2.041800000  | 3.762732000  | 1.363548000  |
|                                                             |              |              |              | 1            | 1.590412000  | 3.371219000  | 3.042922000  |
|                                                             |              |              |              | 6            | 4.702137000  | 0.956096000  | 3.300258000  |



|   |             |              |             |   |              |              |              |
|---|-------------|--------------|-------------|---|--------------|--------------|--------------|
| 1 | 4.989362000 | 0.614327000  | 4.347743000 | 8 | 3.364687000  | 1.117388000  | 3.327077000  |
| 1 | 5.435947000 | 1.639802000  | 2.960160000 | 1 | 0.050537000  | -4.453604000 | -2.311074000 |
| 6 | 3.334487000 | 1.572580000  | 3.378999000 | 1 | 4.504013000  | 0.158484000  | -2.641442000 |
| 1 | 3.406071000 | 2.408339000  | 4.105585000 | 1 | 3.143657000  | -2.015077000 | -3.474551000 |
| 1 | 2.564619000 | 0.885285000  | 3.757820000 | 1 | 3.186201000  | 4.810273000  | -0.553094000 |
| 8 | 0.616327000 | -0.037517000 | 4.683247000 | 1 | 0.844507000  | 6.011968000  | 0.128823000  |
| 1 | 0.368211000 | 0.674949000  | 4.062914000 | 1 | -4.240996000 | 4.530048000  | 0.122372000  |
| 1 | 0.970698000 | -0.689694000 | 4.046108000 | 1 | -5.520732000 | 2.185618000  | -0.252886000 |

**<sup>3</sup>RC1H30+:**

|    |              |              |              |   |              |              |              |
|----|--------------|--------------|--------------|---|--------------|--------------|--------------|
| 6  | -1.484208000 | 6.027793000  | 1.553980000  | 1 | -1.961367000 | -3.522949000 | -3.295641000 |
| 6  | -1.818002000 | 5.643679000  | 0.243051000  | 1 | 3.935392000  | 3.853268000  | -3.246360000 |
| 6  | -2.533394000 | 6.553327000  | -0.554122000 | 1 | 6.311749000  | 4.570414000  | -3.429511000 |
| 6  | -2.910469000 | 7.804495000  | -0.056478000 | 1 | 7.996603000  | 3.657789000  | -1.805783000 |
| 6  | -2.572521000 | 8.172139000  | 1.249487000  | 1 | 7.246851000  | 2.072677000  | -0.022911000 |
| 6  | -1.856423000 | 7.278108000  | 2.053573000  | 1 | -2.794653000 | 6.270703000  | -1.576602000 |
| 6  | -1.425346000 | 4.302053000  | -0.279408000 | 1 | -3.466996000 | 8.496514000  | -0.693699000 |
| 6  | -0.043760000 | 4.043114000  | -0.473164000 | 1 | -2.865360000 | 9.149967000  | 1.639559000  |
| 7  | 0.488405000  | 2.867071000  | -0.963777000 | 1 | -1.591853000 | 7.554133000  | 3.077553000  |
| 6  | 1.853089000  | 3.080991000  | -1.051112000 | 1 | -0.930643000 | 5.328979000  | 2.185344000  |
| 6  | 2.184266000  | 4.390683000  | -0.586845000 | 1 | -5.863043000 | 0.105655000  | -2.768107000 |
| 6  | 0.993209000  | 5.000317000  | -0.238835000 | 1 | -8.198074000 | -0.656128000 | -2.332024000 |
| 26 | -0.487206000 | 1.119254000  | -1.289033000 | 1 | -8.802526000 | -1.551308000 | -0.075166000 |
| 7  | -2.234759000 | 2.056727000  | -0.946645000 | 1 | -7.077993000 | -1.689773000 | 1.703811000  |
| 6  | -3.473619000 | 1.442861000  | -0.838678000 | 1 | 0.652567000  | -6.440994000 | -3.646393000 |
| 6  | -4.466741000 | 2.405313000  | -0.405152000 | 1 | 1.627520000  | -6.173071000 | -5.932590000 |
| 6  | -3.820741000 | 3.587289000  | -0.217524000 | 1 | 1.980517000  | -3.876444000 | -6.853292000 |
| 6  | -2.418030000 | 3.361868000  | -0.516152000 | 1 | 1.368573000  | -1.887418000 | -5.504742000 |
| 6  | -3.751974000 | 0.105422000  | -1.065219000 | 1 | 3.222811000  | 2.075391000  | 1.110862000  |
| 6  | -5.141863000 | -0.375444000 | -0.803430000 | 1 | 2.966224000  | 0.482506000  | 0.378194000  |
| 6  | -5.505666000 | -0.899758000 | 0.445927000  | 1 | -3.802433000 | -1.820581000 | 3.116186000  |
| 6  | -6.812901000 | -1.310202000 | 0.716289000  | 1 | -5.322850000 | -2.535591000 | 2.538461000  |
| 6  | -7.780821000 | -1.227481000 | -0.285557000 | 7 | -2.370808000 | -3.536517000 | 1.635726000  |
| 6  | -7.443309000 | -0.723513000 | -1.545539000 | 8 | -0.633807000 | -1.556670000 | 4.210111000  |
| 6  | -6.136270000 | -0.298393000 | -1.790876000 | 8 | 0.664572000  | -4.068685000 | 1.215885000  |
| 6  | 2.795874000  | 2.157813000  | -1.559093000 | 8 | 2.159136000  | -1.794798000 | 4.035255000  |
| 6  | 4.235657000  | 2.566738000  | -1.556949000 | 8 | 3.379983000  | -3.389884000 | 1.379278000  |
| 6  | 4.676903000  | 3.471844000  | -2.540435000 | 6 | -0.392415000 | -4.983778000 | 0.981239000  |
| 6  | 6.007779000  | 3.872724000  | -2.646146000 | 1 | -0.503175000 | -5.579973000 | 1.899568000  |
| 6  | 6.946653000  | 3.361864000  | -1.742034000 | 6 | -1.707317000 | -4.336715000 | 0.590634000  |
| 6  | 6.538191000  | 2.477409000  | -0.748362000 | 1 | -0.114044000 | -5.683193000 | 0.172439000  |
| 6  | 5.193395000  | 2.078978000  | -0.641352000 | 1 | -2.400136000 | -5.135196000 | 0.283814000  |
| 8  | 4.950228000  | 1.187028000  | 0.360241000  | 1 | -1.572069000 | -3.704227000 | -0.302506000 |
| 6  | 3.666333000  | 1.081735000  | 0.974020000  | 6 | 1.389798000  | -3.663141000 | 0.066096000  |
| 6  | 3.804735000  | 0.482708000  | 2.367729000  | 1 | 1.785343000  | -4.557116000 | -0.452067000 |
| 7  | 4.389056000  | -0.742716000 | 2.507378000  | 1 | 0.738351000  | -3.115335000 | -0.636202000 |
| 8  | -4.534302000 | -0.932568000 | 1.446708000  | 6 | 2.520302000  | -2.741778000 | 0.456102000  |
| 6  | -4.351644000 | -2.131859000 | 2.225327000  | 1 | 3.052339000  | -2.477222000 | -0.476535000 |
| 6  | -3.646861000 | -3.169733000 | 1.345793000  | 1 | 2.114726000  | -1.814657000 | 0.884969000  |
| 8  | -4.252281000 | -3.586658000 | 0.361753000  | 6 | 4.726745000  | -2.984682000 | 1.359665000  |
| 7  | 1.179540000  | 0.392005000  | -2.199483000 | 1 | 5.205547000  | -3.486630000 | 2.214050000  |
| 6  | 2.456717000  | 0.924452000  | -2.089490000 | 1 | 5.235299000  | -3.354092000 | 0.444951000  |
| 6  | 3.430118000  | -0.010160000 | -2.613631000 | 6 | 4.990165000  | -1.478046000 | 1.397471000  |
| 6  | 2.741106000  | -1.104184000 | -3.040393000 | 1 | 6.088837000  | -1.351625000 | 1.413280000  |
| 6  | 1.333878000  | -0.856258000 | -2.774220000 | 1 | 4.651049000  | -1.031348000 | 0.459850000  |
| 6  | 0.332514000  | -1.799088000 | -3.008980000 | 6 | -1.717979000 | -3.193945000 | 2.900237000  |
| 6  | 0.676597000  | -3.016422000 | -3.798792000 | 6 | -1.031684000 | -1.836692000 | 2.882914000  |
| 6  | 0.474672000  | -4.319350000 | -3.304688000 | 1 | -2.456657000 | -3.218750000 | 3.713676000  |
| 6  | 0.813429000  | -5.442866000 | -4.061648000 | 1 | -0.969720000 | -3.951615000 | 3.154604000  |
| 6  | 1.361734000  | -5.294371000 | -5.340048000 | 1 | -1.720290000 | -1.060777000 | 2.507256000  |
| 6  | 1.561950000  | -4.008762000 | -5.852288000 | 1 | -0.173934000 | -1.852729000 | 2.196092000  |
| 6  | 1.219602000  | -2.887540000 | -5.092399000 | 6 | 0.235248000  | -0.442758000 | 4.360266000  |
| 7  | -1.479999000 | -0.542275000 | -1.842688000 | 1 | -0.226808000 | 0.285389000  | 5.052565000  |
| 6  | -1.000075000 | -1.638009000 | -2.543838000 | 6 | 1.571011000  | -0.868986000 | 4.933473000  |
| 6  | -2.052256000 | -2.587608000 | -2.752052000 | 1 | 0.381553000  | 0.063638000  | 3.393870000  |
| 6  | -3.181690000 | -2.079107000 | -2.143000000 | 1 | 2.206913000  | 0.023940000  | 5.044174000  |
| 6  | -2.819913000 | -0.808958000 | -1.607804000 | 1 | 1.435722000  | -1.344627000 | 5.925267000  |
|    |              |              |              | 6 | 4.564327000  | -1.243600000 | 3.865755000  |









|                                        |              |              |              |   |              |              |              |
|----------------------------------------|--------------|--------------|--------------|---|--------------|--------------|--------------|
| 6                                      | -3.321010000 | -0.288480000 | 0.293213000  | 6 | 3.068276000  | -4.303220000 | -2.469793000 |
| 1                                      | -3.089987000 | 0.062487000  | 1.313303000  | 6 | 4.104502000  | -5.238664000 | -2.499761000 |
| 1                                      | -2.514918000 | 0.055328000  | -0.378869000 | 6 | 5.209253000  | -5.065981000 | -1.663569000 |
| 6                                      | -4.906873000 | 1.509115000  | 0.240416000  | 6 | 5.266030000  | -3.965156000 | -0.804556000 |
| 1                                      | -5.898633000 | 1.704278000  | -0.193054000 | 6 | 4.218519000  | -3.036504000 | -0.771439000 |
| 1                                      | -5.013955000 | 1.576817000  | 1.341372000  | 8 | 4.229668000  | -1.975749000 | 0.098523000  |
| 6                                      | -3.918411000 | 2.605457000  | -0.167570000 | 6 | 5.466963000  | -1.312816000 | 0.308718000  |
| 1                                      | -4.364011000 | 3.571586000  | 0.129478000  | 6 | 5.272020000  | -0.070841000 | 1.179594000  |
| 1                                      | -3.007605000 | 2.500469000  | 0.427201000  | 7 | 4.788925000  | -0.239433000 | 2.444373000  |
| 6                                      | -1.804683000 | -3.212695000 | -3.521919000 | 8 | -4.002931000 | 2.081412000  | 1.515998000  |
| 6                                      | -2.004384000 | -1.696154000 | -3.555112000 | 6 | -4.804174000 | 1.316611000  | 2.401497000  |
| 1                                      | -1.050463000 | -3.499963000 | -4.269423000 | 6 | -4.469438000 | -0.168141000 | 2.221925000  |
| 1                                      | -2.736527000 | -3.704746000 | -3.833986000 | 8 | -5.363331000 | -0.932749000 | 1.858366000  |
| 1                                      | -1.065478000 | -1.186635000 | -3.271802000 | 7 | -0.459070000 | -1.824183000 | -1.520952000 |
| 1                                      | -2.766469000 | -1.401453000 | -2.824636000 | 6 | 0.676268000  | -2.610185000 | -1.407468000 |
| 6                                      | -2.350902000 | 0.064447000  | -5.121713000 | 6 | 0.294717000  | -3.977034000 | -1.087594000 |
| 1                                      | -2.058639000 | 0.207279000  | -6.175888000 | 6 | -1.064315000 | -4.026721000 | -1.098818000 |
| 6                                      | -3.685921000 | 0.758295000  | -4.914286000 | 6 | -1.542813000 | -2.687701000 | -1.392037000 |
| 1                                      | -1.594635000 | 0.559393000  | -4.487826000 | 6 | -2.886550000 | -2.343658000 | -1.493977000 |
| 1                                      | -3.543687000 | 1.830615000  | -5.127690000 | 6 | -3.904318000 | -3.433586000 | -1.487514000 |
| 1                                      | -4.446135000 | 0.356598000  | -5.612278000 | 6 | -4.931001000 | -3.477719000 | -0.523193000 |
| 6                                      | -4.635068000 | 2.754236000  | -2.566190000 | 6 | -5.859277000 | -4.521786000 | -0.517474000 |
| 1                                      | -5.481423000 | 3.285073000  | -2.102008000 | 6 | -5.789718000 | -5.540812000 | -1.474141000 |
| 1                                      | -4.259832000 | 3.377522000  | -3.387702000 | 6 | -4.781938000 | -5.504306000 | -2.442396000 |
| 6                                      | -5.146617000 | 1.418058000  | -3.107490000 | 6 | -3.852505000 | -4.460698000 | -2.448402000 |
| 1                                      | -5.885111000 | 1.620643000  | -3.905585000 | 7 | -2.513440000 | 0.114703000  | -1.380903000 |
| 1                                      | -5.653727000 | 0.849439000  | -2.320114000 | 6 | -3.335097000 | -0.997029000 | -1.540754000 |
| 8                                      | -5.644349000 | -1.649618000 | -2.860108000 | 6 | -4.695888000 | -0.585586000 | -1.593752000 |
| 1                                      | -5.066952000 | -1.032204000 | -3.346650000 | 6 | -4.711619000 | 0.785389000  | -1.387973000 |
| 1                                      | -5.183306000 | -1.662773000 | -2.000673000 | 6 | -3.357693000 | 1.196256000  | -1.249806000 |
| 6                                      | 0.503859000  | -0.077176000 | -0.329354000 | 8 | 5.607042000  | 1.022625000  | 0.733119000  |
| 8                                      | -0.012922000 | -0.849375000 | -0.984052000 | 1 | -5.000300000 | -2.690099000 | 0.228765000  |
| 1                                      | 1.875067000  | 1.941209000  | -2.084527000 | 1 | 0.987470000  | -4.788529000 | -0.882862000 |
| 8                                      | 3.027331000  | -0.461725000 | -2.661905000 | 1 | -1.698808000 | -4.886568000 | -0.901747000 |
| 1                                      | 2.734046000  | -1.341555000 | -2.350203000 | 1 | 4.415175000  | -1.073176000 | -2.693298000 |
| 1                                      | 2.029069000  | 2.031080000  | -1.133666000 | 1 | 4.321365000  | 1.637134000  | -2.869540000 |
| 1                                      | 2.244527000  | 1.052104000  | -2.295734000 | 1 | 0.754803000  | 5.273687000  | -1.258698000 |
| 1                                      | 3.923969000  | -0.386349000 | -2.299345000 | 1 | -1.862147000 | 5.166049000  | -0.629484000 |
|                                        |              |              |              | 1 | -5.575178000 | 1.444766000  | -1.338121000 |
|                                        |              |              |              | 1 | -5.549369000 | -1.241915000 | -1.736166000 |
|                                        |              |              |              | 1 | 2.216164000  | -4.417873000 | -3.142457000 |
|                                        |              |              |              | 1 | 4.054491000  | -6.088741000 | -3.183852000 |
|                                        |              |              |              | 1 | 6.032940000  | -5.783586000 | -1.675137000 |
|                                        |              |              |              | 1 | 6.126390000  | -3.840417000 | -0.146435000 |
|                                        |              |              |              | 1 | 1.985867000  | 4.829711000  | -3.668012000 |
|                                        |              |              |              | 1 | 3.724684000  | 6.607168000  | -3.712106000 |
|                                        |              |              |              | 1 | 5.606252000  | 6.556312000  | -2.072054000 |
|                                        |              |              |              | 1 | 5.727386000  | 4.711550000  | -0.391089000 |
|                                        |              |              |              | 1 | 3.992018000  | 2.943460000  | -0.350410000 |
|                                        |              |              |              | 1 | -4.064236000 | 4.796464000  | -2.080207000 |
|                                        |              |              |              | 1 | -5.827906000 | 6.257031000  | -1.094263000 |
|                                        |              |              |              | 1 | -6.775343000 | 5.703940000  | 1.152677000  |
|                                        |              |              |              | 1 | -5.931816000 | 3.734099000  | 2.406537000  |
|                                        |              |              |              | 1 | -6.641994000 | -4.541788000 | 0.245507000  |
|                                        |              |              |              | 1 | -6.517809000 | -6.355719000 | -1.466487000 |
|                                        |              |              |              | 1 | -4.721049000 | -6.288689000 | -3.201174000 |
|                                        |              |              |              | 1 | -3.071811000 | -4.432583000 | -3.211500000 |
|                                        |              |              |              | 1 | 6.211482000  | -1.974752000 | 0.784007000  |
|                                        |              |              |              | 1 | 5.874971000  | -0.960630000 | -0.648773000 |
|                                        |              |              |              | 1 | -4.659101000 | 1.645814000  | 3.445719000  |
|                                        |              |              |              | 1 | -5.868697000 | 1.412142000  | 2.149742000  |
|                                        |              |              |              | 7 | -3.198213000 | -0.590474000 | 2.465101000  |
|                                        |              |              |              | 8 | -0.103717000 | 1.451956000  | 2.439367000  |
|                                        |              |              |              | 8 | -0.531639000 | -2.254919000 | 2.388108000  |
|                                        |              |              |              | 8 | 2.984922000  | 2.113046000  | 2.103273000  |
|                                        |              |              |              | 8 | 2.188642000  | -1.504345000 | 2.936860000  |
|                                        |              |              |              | 6 | -1.789868000 | -2.676333000 | 2.869638000  |
| <b><sup>4</sup>CAT<sub>H3O+</sub>:</b> |              |              |              |   |              |              |              |
| 6                                      | 3.931600000  | 3.743626000  | -1.091027000 |   |              |              |              |
| 6                                      | 2.861290000  | 3.764628000  | -2.006809000 |   |              |              |              |
| 6                                      | 2.805956000  | 4.807783000  | -2.946751000 |   |              |              |              |
| 6                                      | 3.784841000  | 5.806314000  | -2.970687000 |   |              |              |              |
| 6                                      | 4.840216000  | 5.777143000  | -2.054286000 |   |              |              |              |
| 6                                      | 4.908620000  | 4.741282000  | -1.114844000 |   |              |              |              |
| 6                                      | 1.813021000  | 2.706036000  | -1.954275000 |   |              |              |              |
| 6                                      | 2.232754000  | 1.360325000  | -2.126054000 |   |              |              |              |
| 7                                      | 1.471305000  | 0.238810000  | -1.818471000 |   |              |              |              |
| 6                                      | 2.312665000  | -0.846715000 | -1.969525000 |   |              |              |              |
| 6                                      | 3.579705000  | -0.419475000 | -2.455050000 |   |              |              |              |
| 6                                      | 3.530029000  | 0.963631000  | -2.550867000 |   |              |              |              |
| 26                                     | -0.521092000 | 0.180819000  | -1.573555000 |   |              |              |              |
| 7                                      | -0.578131000 | 2.199731000  | -1.556982000 |   |              |              |              |
| 6                                      | -1.652289000 | 2.978342000  | -1.159042000 |   |              |              |              |
| 6                                      | -1.222137000 | 4.354302000  | -0.964900000 |   |              |              |              |
| 6                                      | 0.097726000  | 4.408631000  | -1.286709000 |   |              |              |              |
| 6                                      | 0.507559000  | 3.063514000  | -1.652003000 |   |              |              |              |
| 6                                      | -2.953648000 | 2.533837000  | -0.977263000 |   |              |              |              |
| 6                                      | -3.987709000 | 3.443571000  | -0.414503000 |   |              |              |              |
| 6                                      | -4.533418000 | 3.153008000  | 0.860984000  |   |              |              |              |
| 6                                      | -5.531581000 | 3.960317000  | 1.416927000  |   |              |              |              |
| 6                                      | -5.997341000 | 5.076294000  | 0.711469000  |   |              |              |              |
| 6                                      | -5.465282000 | 5.387878000  | -0.540951000 |   |              |              |              |
| 6                                      | -4.470424000 | 4.571455000  | -1.091473000 |   |              |              |              |
| 6                                      | 1.984680000  | -2.191862000 | -1.635554000 |   |              |              |              |
| 6                                      | 3.089725000  | -3.187149000 | -1.613662000 |   |              |              |              |

|                                        |              |              |              |   |              |              |              |
|----------------------------------------|--------------|--------------|--------------|---|--------------|--------------|--------------|
| 1                                      | -1.866183000 | -2.517706000 | 3.963529000  | 6 | 3.086813000  | -4.266198000 | -2.474835000 |
| 6                                      | -2.915453000 | -1.991603000 | 2.120814000  | 6 | 4.117717000  | -5.206026000 | -2.523685000 |
| 1                                      | -1.913825000 | -3.760427000 | 2.689333000  | 6 | 5.227305000  | -5.055203000 | -1.687911000 |
| 1                                      | -3.839099000 | -2.551965000 | 2.308696000  | 6 | 5.287465000  | -3.968487000 | -0.811085000 |
| 1                                      | -2.707342000 | -2.073572000 | 1.042137000  | 6 | 4.244015000  | -3.035359000 | -0.760605000 |
| 6                                      | 0.506045000  | -3.196467000 | 2.547892000  | 8 | 4.267124000  | -1.995471000 | 0.137033000  |
| 1                                      | 0.600008000  | -3.507155000 | 3.607622000  | 6 | 5.507368000  | -1.346967000 | 0.356884000  |
| 1                                      | 0.298469000  | -4.101686000 | 1.944400000  | 6 | 5.317737000  | -0.109439000 | 1.234283000  |
| 6                                      | 1.797743000  | -2.569086000 | 2.075912000  | 7 | 4.800484000  | -0.279369000 | 2.485629000  |
| 1                                      | 2.583800000  | -3.338274000 | 2.017090000  | 8 | -4.018381000 | 2.039611000  | 1.563881000  |
| 1                                      | 1.664933000  | -2.159141000 | 1.065138000  | 6 | -4.815918000 | 1.274389000  | 2.448762000  |
| 6                                      | 3.294946000  | -1.741296000 | 3.784020000  | 6 | -4.487690000 | -0.211621000 | 2.263389000  |
| 1                                      | 3.186768000  | -1.045011000 | 4.627855000  | 8 | -5.397633000 | -0.978086000 | 1.944717000  |
| 1                                      | 3.269252000  | -2.763106000 | 4.204593000  | 7 | -0.457163000 | -1.818052000 | -1.558595000 |
| 6                                      | 4.632976000  | -1.546436000 | 3.077284000  | 6 | 0.683434000  | -2.606066000 | -1.417979000 |
| 1                                      | 5.433855000  | -1.694233000 | 3.825855000  | 6 | 0.304199000  | -3.957110000 | -1.127911000 |
| 1                                      | 4.745397000  | -2.327647000 | 2.320942000  | 6 | -1.075942000 | -4.008003000 | -1.162422000 |
| 6                                      | -2.124105000 | 0.275870000  | 2.938189000  | 6 | -1.542642000 | -2.683310000 | -1.450892000 |
| 6                                      | -1.165170000 | 0.715541000  | 1.838053000  | 6 | -2.905533000 | -2.321735000 | -1.566447000 |
| 1                                      | -2.553154000 | 1.167510000  | 3.410519000  | 6 | -3.918844000 | -3.408873000 | -1.573003000 |
| 1                                      | -1.553790000 | -0.250899000 | 3.713866000  | 6 | -4.967559000 | -3.456588000 | -0.627664000 |
| 1                                      | -1.700530000 | 1.343800000  | 1.112464000  | 6 | -5.899705000 | -4.497626000 | -0.633751000 |
| 1                                      | -0.763135000 | -0.167729000 | 1.315584000  | 6 | -5.815062000 | -5.525955000 | -1.579584000 |
| 6                                      | 0.608230000  | 2.220573000  | 1.479035000  | 6 | -4.782237000 | -5.496639000 | -2.523822000 |
| 1                                      | -0.068597000 | 2.983330000  | 1.059854000  | 6 | -3.853247000 | -4.453764000 | -2.519184000 |
| 6                                      | 1.824034000  | 2.920644000  | 2.048066000  | 7 | -2.518851000 | 0.133417000  | -1.405051000 |
| 1                                      | 0.935118000  | 1.579655000  | 0.643436000  | 6 | -3.342482000 | -0.978217000 | -1.573797000 |
| 1                                      | 2.052750000  | 3.755353000  | 1.364593000  | 6 | -4.707713000 | -0.555681000 | -1.614295000 |
| 1                                      | 1.589486000  | 3.353409000  | 3.038490000  | 6 | -4.720790000 | 0.806445000  | -1.368336000 |
| 6                                      | 4.701256000  | 0.941443000  | 3.303504000  | 6 | -3.364483000 | 1.221333000  | -1.234242000 |
| 1                                      | 4.997602000  | 0.649453000  | 4.323379000  | 8 | 5.682933000  | 0.981847000  | 0.805624000  |
| 1                                      | 5.427967000  | 1.675643000  | 2.931753000  | 1 | -5.045294000 | -2.671297000 | 0.125954000  |
| 6                                      | 3.331820000  | 1.603986000  | 3.372942000  | 1 | 0.991127000  | -4.775307000 | -0.927453000 |
| 1                                      | 3.405069000  | 2.428887000  | 4.111165000  | 1 | -1.709963000 | -4.873681000 | -0.988356000 |
| 1                                      | 2.564158000  | 0.909796000  | 3.743497000  | 1 | 4.453483000  | -1.032995000 | -2.603028000 |
| 8                                      | 0.617813000  | -0.033003000 | 4.695222000  | 1 | 4.349761000  | 1.667386000  | -2.809155000 |
| 1                                      | 0.370244000  | 0.688505000  | 4.087072000  | 1 | 0.757457000  | 5.297152000  | -1.194526000 |
| 1                                      | 0.976587000  | -0.674615000 | 4.049753000  | 1 | -1.870493000 | 5.175459000  | -0.548248000 |
|                                        |              |              |              | 1 | -5.585154000 | 1.464306000  | -1.298810000 |
|                                        |              |              |              | 1 | -5.564324000 | -1.205081000 | -1.772634000 |
|                                        |              |              |              | 1 | 2.231174000  | -4.368266000 | -3.144863000 |
|                                        |              |              |              | 1 | 4.061759000  | -6.043104000 | -3.223899000 |
|                                        |              |              |              | 1 | 6.048023000  | -5.776024000 | -1.713772000 |
|                                        |              |              |              | 1 | 6.148075000  | -3.858476000 | -0.150088000 |
|                                        |              |              |              | 1 | 1.885067000  | 4.892046000  | -3.629890000 |
|                                        |              |              |              | 1 | 3.588952000  | 6.694599000  | -3.744439000 |
|                                        |              |              |              | 1 | 5.559343000  | 6.657755000  | -2.207425000 |
|                                        |              |              |              | 1 | 5.791680000  | 4.795843000  | -0.554920000 |
|                                        |              |              |              | 1 | 4.083517000  | 3.006746000  | -0.440603000 |
|                                        |              |              |              | 1 | -4.066565000 | 4.837140000  | -1.971853000 |
|                                        |              |              |              | 1 | -5.818322000 | 6.286080000  | -0.949759000 |
|                                        |              |              |              | 1 | -6.767675000 | 5.686133000  | 1.286114000  |
|                                        |              |              |              | 1 | -5.932450000 | 3.680798000  | 2.489089000  |
|                                        |              |              |              | 1 | -6.695921000 | -4.510743000 | 0.116156000  |
|                                        |              |              |              | 1 | -6.544491000 | -6.339908000 | -1.581205000 |
|                                        |              |              |              | 1 | -4.704959000 | -6.287315000 | -3.275398000 |
|                                        |              |              |              | 1 | -3.055167000 | -4.436788000 | -3.264574000 |
|                                        |              |              |              | 1 | 6.244900000  | -2.017187000 | 0.833581000  |
|                                        |              |              |              | 1 | 5.925920000  | -0.991973000 | -0.595269000 |
|                                        |              |              |              | 1 | -4.666572000 | 1.596986000  | 3.495292000  |
|                                        |              |              |              | 1 | -5.882265000 | 1.373011000  | 2.204696000  |
|                                        |              |              |              | 7 | -3.204332000 | -0.627720000 | 2.445735000  |
|                                        |              |              |              | 8 | -0.109275000 | 1.416356000  | 2.409391000  |
|                                        |              |              |              | 8 | -0.533248000 | -2.286870000 | 2.387930000  |
|                                        |              |              |              | 8 | 2.985942000  | 2.034041000  | 2.098064000  |
|                                        |              |              |              | 8 | 2.184124000  | -1.542233000 | 2.937028000  |
|                                        |              |              |              | 6 | -1.807596000 | -2.725864000 | 2.808063000  |
| <b><sup>5</sup>CAT<sub>H3O+</sub>:</b> |              |              |              |   |              |              |              |
| 6                                      | 3.975947000  | 3.808493000  | -1.173903000 |   |              |              |              |
| 6                                      | 2.856082000  | 3.810687000  | -2.033342000 |   |              |              |              |
| 6                                      | 2.742182000  | 4.872171000  | -2.952853000 |   |              |              |              |
| 6                                      | 3.701417000  | 5.886832000  | -3.015965000 |   |              |              |              |
| 6                                      | 4.807214000  | 5.866249000  | -2.158802000 |   |              |              |              |
| 6                                      | 4.937494000  | 4.819808000  | -1.237510000 |   |              |              |              |
| 6                                      | 1.827341000  | 2.741385000  | -1.946298000 |   |              |              |              |
| 6                                      | 2.248341000  | 1.400291000  | -2.081697000 |   |              |              |              |
| 7                                      | 1.484627000  | 0.272785000  | -1.781466000 |   |              |              |              |
| 6                                      | 2.336045000  | -0.820386000 | -1.911864000 |   |              |              |              |
| 6                                      | 3.611407000  | -0.382566000 | -2.376571000 |   |              |              |              |
| 6                                      | 3.556610000  | 0.996437000  | -2.488171000 |   |              |              |              |
| 26                                     | -0.518031000 | 0.205674000  | -1.573366000 |   |              |              |              |
| 7                                      | -0.578121000 | 2.240278000  | -1.537518000 |   |              |              |              |
| 6                                      | -1.655266000 | 3.012082000  | -1.110955000 |   |              |              |              |
| 6                                      | -1.233416000 | 4.367142000  | -0.899008000 |   |              |              |              |
| 6                                      | 0.102706000  | 4.430399000  | -1.237411000 |   |              |              |              |
| 6                                      | 0.504799000  | 3.108122000  | -1.626892000 |   |              |              |              |
| 6                                      | -2.967612000 | 2.542464000  | -0.939042000 |   |              |              |              |
| 6                                      | -3.996096000 | 3.437757000  | -0.346613000 |   |              |              |              |
| 6                                      | -4.542574000 | 3.125779000  | 0.925914000  |   |              |              |              |
| 6                                      | -5.533870000 | 3.927321000  | 1.503431000  |   |              |              |              |
| 6                                      | -5.994723000 | 5.064211000  | 0.827844000  |   |              |              |              |
| 6                                      | -5.461251000 | 5.401148000  | -0.417519000 |   |              |              |              |
| 6                                      | -4.473887000 | 4.589524000  | -0.988932000 |   |              |              |              |
| 6                                      | 2.009609000  | -2.161361000 | -1.612686000 |   |              |              |              |
| 6                                      | 3.110211000  | -3.158250000 | -1.604181000 |   |              |              |              |

|                              |              |              |              |   |              |              |              |
|------------------------------|--------------|--------------|--------------|---|--------------|--------------|--------------|
| 1                            | -1.922963000 | -2.608567000 | 3.904178000  | 6 | 5.173364000  | 2.178808000  | -2.918214000 |
| 6                            | -2.909431000 | -2.012132000 | 2.049110000  | 6 | 6.559111000  | 2.247267000  | -3.056605000 |
| 1                            | -1.922183000 | -3.802649000 | 2.582203000  | 6 | 7.369372000  | 1.558390000  | -2.146902000 |
| 1                            | -3.838593000 | -2.577087000 | 2.186918000  | 6 | 6.783058000  | 0.829342000  | -1.116159000 |
| 1                            | -2.670955000 | -2.049745000 | 0.973267000  | 6 | 5.385232000  | 0.766194000  | -0.976708000 |
| 6                            | 0.499827000  | -3.233923000 | 2.543700000  | 8 | 4.957765000  | -0.021109000 | 0.053566000  |
| 1                            | 0.587654000  | -3.554265000 | 3.601616000  | 6 | 3.742928000  | 0.248105000  | 0.754497000  |
| 1                            | 0.291611000  | -4.131957000 | 1.930010000  | 6 | 3.890813000  | 0.031106000  | 2.261107000  |
| 6                            | 1.796014000  | -2.610730000 | 2.077725000  | 7 | 4.428098000  | -1.127995000 | 2.741128000  |
| 1                            | 2.581061000  | -3.381960000 | 2.029782000  | 8 | -4.433637000 | -0.241599000 | 1.616681000  |
| 1                            | 1.672139000  | -2.209150000 | 1.062151000  | 6 | -4.421742000 | -1.428033000 | 2.429339000  |
| 6                            | 3.278741000  | -1.780336000 | 3.798006000  | 6 | -3.997821000 | -2.620048000 | 1.565759000  |
| 1                            | 3.161412000  | -1.084501000 | 4.641157000  | 8 | -4.763390000 | -2.978775000 | 0.675475000  |
| 1                            | 3.246568000  | -2.802402000 | 4.217897000  | 7 | 1.070463000  | -0.021669000 | -2.357841000 |
| 6                            | 4.627001000  | -1.588138000 | 3.110346000  | 6 | 2.428575000  | 0.226941000  | -2.318108000 |
| 1                            | 5.416259000  | -1.743758000 | 3.869957000  | 6 | 3.137601000  | -0.924266000 | -2.854395000 |
| 1                            | 4.745226000  | -2.365987000 | 2.351421000  | 6 | 2.198784000  | -1.849105000 | -3.204456000 |
| 6                            | -2.123517000 | 0.236244000  | 2.908321000  | 6 | 0.894010000  | -1.290312000 | -2.871043000 |
| 6                            | -1.171032000 | 0.681264000  | 1.804907000  | 6 | -0.319926000 | -1.987797000 | -2.963314000 |
| 1                            | -2.546939000 | 1.126828000  | 3.387163000  | 6 | -0.314775000 | -3.313709000 | -3.642351000 |
| 1                            | -1.547816000 | -0.294935000 | 3.677284000  | 6 | -0.794797000 | -4.467611000 | -2.992747000 |
| 1                            | -1.708272000 | 1.309795000  | 1.080848000  | 6 | -0.782678000 | -5.712189000 | -3.624421000 |
| 1                            | -0.766015000 | -0.197626000 | 1.277289000  | 6 | -0.292105000 | -5.836015000 | -4.929455000 |
| 6                            | 0.614919000  | 2.172214000  | 1.444312000  | 6 | 0.181076000  | -4.699927000 | -5.593346000 |
| 1                            | -0.050165000 | 2.941201000  | 1.018848000  | 6 | 0.165428000  | -3.454933000 | -4.958222000 |
| 6                            | 1.836945000  | 2.859038000  | 2.013271000  | 7 | -1.759360000 | -0.347064000 | -1.747349000 |
| 1                            | 0.929732000  | 1.523960000  | 0.609938000  | 6 | -1.569733000 | -1.525085000 | -2.441011000 |
| 1                            | 2.085543000  | 3.675493000  | 1.315151000  | 6 | -2.830337000 | -2.199088000 | -2.578742000 |
| 1                            | 1.601427000  | 3.313910000  | 2.993810000  | 6 | -3.780310000 | -1.419862000 | -1.942496000 |
| 6                            | 4.695412000  | 0.900545000  | 3.343543000  | 6 | -3.100212000 | -0.261922000 | -1.450588000 |
| 1                            | 4.972157000  | 0.610422000  | 4.369602000  | 8 | 3.504436000  | 0.933444000  | 3.006762000  |
| 1                            | 5.428338000  | 1.634521000  | 2.984104000  | 1 | -1.168096000 | -4.373204000 | -1.974158000 |
| 6                            | 3.322906000  | 1.560380000  | 3.383186000  | 1 | 4.218538000  | -1.008566000 | -2.943035000 |
| 1                            | 3.387840000  | 2.404084000  | 4.101055000  | 1 | 2.372274000  | -2.839993000 | -3.615736000 |
| 1                            | 2.554121000  | 0.874085000  | 3.765865000  | 1 | 4.093042000  | 3.996705000  | -1.103705000 |
| 8                            | 0.604682000  | -0.052627000 | 4.674211000  | 1 | 2.130587000  | 5.736321000  | -0.429249000 |
| 1                            | 0.357948000  | 0.656874000  | 4.050437000  | 1 | -3.176404000 | 5.327254000  | 0.239159000  |
| 1                            | 0.965772000  | -0.704881000 | 4.040700000  | 1 | -4.938546000 | 3.301791000  | 0.117705000  |
|                              |              |              |              | 1 | -4.842612000 | -1.619430000 | -1.836608000 |
|                              |              |              |              | 1 | -2.998136000 | -3.136286000 | -3.101642000 |
|                              |              |              |              | 1 | 4.529528000  | 2.702028000  | -3.629070000 |
|                              |              |              |              | 1 | 7.002808000  | 2.825807000  | -3.869903000 |
|                              |              |              |              | 1 | 8.457982000  | 1.593805000  | -2.235010000 |
|                              |              |              |              | 1 | 7.391273000  | 0.292431000  | -0.385317000 |
|                              |              |              |              | 1 | -1.680876000 | 6.639839000  | -1.773921000 |
|                              |              |              |              | 1 | -1.805907000 | 8.994752000  | -0.986159000 |
|                              |              |              |              | 1 | -0.762062000 | 9.643689000  | 1.187555000  |
|                              |              |              |              | 1 | 0.399010000  | 7.911739000  | 2.562306000  |
|                              |              |              |              | 1 | 0.512412000  | 5.559850000  | 1.766701000  |
|                              |              |              |              | 1 | -5.996788000 | 1.539260000  | -2.240858000 |
|                              |              |              |              | 1 | -8.373378000 | 1.136980000  | -1.597458000 |
|                              |              |              |              | 1 | -8.889407000 | 0.021731000  | 0.581663000  |
|                              |              |              |              | 1 | -7.048375000 | -0.649085000 | 2.096077000  |
|                              |              |              |              | 1 | -1.151610000 | -6.592216000 | -3.091230000 |
|                              |              |              |              | 1 | -0.281572000 | -6.809659000 | -5.425336000 |
|                              |              |              |              | 1 | 0.558176000  | -4.780620000 | -6.616137000 |
|                              |              |              |              | 1 | 0.524013000  | -2.570390000 | -5.488746000 |
|                              |              |              |              | 1 | 3.457212000  | 1.298274000  | 0.643263000  |
|                              |              |              |              | 1 | 2.918911000  | -0.363623000 | 0.371947000  |
|                              |              |              |              | 1 | -3.758733000 | -1.203306000 | 3.267072000  |
|                              |              |              |              | 1 | -5.422247000 | -1.634890000 | 2.828629000  |
|                              |              |              |              | 7 | -2.795060000 | -3.213062000 | 1.798537000  |
|                              |              |              |              | 8 | -0.462086000 | -1.513194000 | 4.099058000  |
|                              |              |              |              | 8 | -0.201456000 | -3.713242000 | 0.372631000  |
|                              |              |              |              | 8 | 2.264139000  | -1.886784000 | 4.531882000  |
|                              |              |              |              | 8 | 2.396666000  | -2.749423000 | 1.381387000  |
|                              |              |              |              | 6 | -1.015881000 | -4.768033000 | 0.838240000  |
| <b><sup>5</sup>RC1 H3O+:</b> |              |              |              |   |              |              |              |
| 6                            | 0.008850000  | 6.316442000  | 1.160954000  |   |              |              |              |
| 6                            | -0.576345000 | 5.933159000  | -0.059672000 |   |              |              |              |
| 6                            | -1.226497000 | 6.920374000  | -0.820875000 |   |              |              |              |
| 6                            | -1.295744000 | 8.244322000  | -0.376770000 |   |              |              |              |
| 6                            | -0.709948000 | 8.609285000  | 0.839181000  |   |              |              |              |
| 6                            | -0.056506000 | 7.638461000  | 1.606986000  |   |              |              |              |
| 6                            | -0.517115000 | 4.516550000  | -0.526878000 |   |              |              |              |
| 6                            | 0.779433000  | 3.977187000  | -0.799520000 |   |              |              |              |
| 7                            | 1.027317000  | 2.686425000  | -1.211515000 |   |              |              |              |
| 6                            | 2.386547000  | 2.561190000  | -1.385122000 |   |              |              |              |
| 6                            | 3.024539000  | 3.801561000  | -1.055753000 |   |              |              |              |
| 6                            | 2.018472000  | 4.691875000  | -0.709145000 |   |              |              |              |
| 26                           | -0.334670000 | 1.106066000  | -1.257318000 |   |              |              |              |
| 7                            | -1.886827000 | 2.499164000  | -1.014143000 |   |              |              |              |
| 6                            | -3.189432000 | 2.139193000  | -0.725622000 |   |              |              |              |
| 6                            | -3.895429000 | 3.294089000  | -0.190833000 |   |              |              |              |
| 6                            | -3.001017000 | 4.319812000  | -0.129738000 |   |              |              |              |
| 6                            | -1.721603000 | 3.810304000  | -0.608855000 |   |              |              |              |
| 6                            | -3.748662000 | 0.869879000  | -0.871067000 |   |              |              |              |
| 6                            | -5.171475000 | 0.667083000  | -0.461426000 |   |              |              |              |
| 6                            | -5.495122000 | 0.044756000  | 0.756385000  |   |              |              |              |
| 6                            | -6.817793000 | -0.182706000 | 1.138195000  |   |              |              |              |
| 6                            | -7.854043000 | 0.203472000  | 0.285165000  |   |              |              |              |
| 6                            | -7.565097000 | 0.829784000  | -0.930308000 |   |              |              |              |
| 6                            | -6.234955000 | 1.057234000  | -1.290189000 |   |              |              |              |
| 6                            | 3.052028000  | 1.387944000  | -1.857277000 |   |              |              |              |
| 6                            | 4.548564000  | 1.438403000  | -1.896982000 |   |              |              |              |

|                   |              |              |              |   |              |              |              |
|-------------------|--------------|--------------|--------------|---|--------------|--------------|--------------|
| 1                 | -0.637997000 | -5.130739000 | 1.810793000  | 6 | 5.316868000  | -1.584089000 | -0.497497000 |
| 6                 | -2.469161000 | -4.337325000 | 0.905223000  | 6 | 6.537630000  | -2.189678000 | -0.809784000 |
| 1                 | -0.987079000 | -5.625197000 | 0.138476000  | 6 | 7.516389000  | -2.326402000 | 0.176119000  |
| 1                 | -3.062688000 | -5.222920000 | 1.198245000  | 6 | 7.281880000  | -1.851317000 | 1.470264000  |
| 1                 | -2.808729000 | -4.051001000 | -0.099088000 | 6 | 6.064605000  | -1.232717000 | 1.766148000  |
| 6                 | 1.070821000  | -4.109941000 | -0.115604000 | 6 | -2.423725000 | 2.564092000  | 1.472053000  |
| 1                 | 1.453095000  | -4.977962000 | 0.454073000  | 6 | -3.789439000 | 3.178145000  | 1.475577000  |
| 1                 | 0.992867000  | -4.412086000 | -1.174969000 | 6 | -4.063837000 | 4.161102000  | 2.446508000  |
| 6                 | 2.032393000  | -2.948525000 | 0.021647000  | 6 | -5.315388000 | 4.759973000  | 2.576371000  |
| 1                 | 2.923363000  | -3.119088000 | -0.603755000 | 6 | -6.347458000 | 4.371078000  | 1.714931000  |
| 1                 | 1.542851000  | -2.028290000 | -0.323247000 | 6 | -6.105657000 | 3.409651000  | 0.738715000  |
| 6                 | 3.613506000  | -3.323090000 | 1.822655000  | 6 | -4.840157000 | 2.810148000  | 0.605256000  |
| 1                 | 3.410883000  | -3.778873000 | 2.799827000  | 8 | -4.770380000 | 1.874918000  | -0.382331000 |
| 1                 | 3.940957000  | -4.134640000 | 1.148096000  | 6 | -3.532945000 | 1.537891000  | -1.004510000 |
| 6                 | 4.733270000  | -2.285046000 | 1.904552000  | 6 | -3.810212000 | 0.848387000  | -2.334908000 |
| 1                 | 5.634280000  | -2.776089000 | 2.308549000  | 7 | -4.523057000 | -0.315393000 | -2.329977000 |
| 1                 | 4.985628000  | -1.935756000 | 0.898338000  | 8 | 4.344891000  | -1.388035000 | -1.457980000 |
| 6                 | -1.995312000 | -2.938178000 | 2.995471000  | 6 | 3.930898000  | -2.479960000 | -2.281062000 |
| 6                 | -1.120354000 | -1.698027000 | 2.863209000  | 6 | 3.138187000  | -3.465883000 | -1.415379000 |
| 1                 | -2.644605000 | -2.846455000 | 3.879345000  | 8 | 3.683144000  | -3.913313000 | -0.408567000 |
| 1                 | -1.329513000 | -3.786261000 | 3.186886000  | 7 | -1.087519000 | 0.575903000  | 2.161508000  |
| 1                 | -1.729536000 | -0.810868000 | 2.610673000  | 6 | -2.275636000 | 1.276217000  | 2.042071000  |
| 1                 | -0.404092000 | -1.833069000 | 2.039225000  | 6 | -3.347190000 | 0.528746000  | 2.605715000  |
| 6                 | 0.441037000  | -0.420546000 | 4.124490000  | 6 | -2.801182000 | -0.647402000 | 3.092468000  |
| 1                 | -0.066527000 | 0.496571000  | 4.482939000  | 6 | -1.403666000 | -0.603879000 | 2.809917000  |
| 6                 | 1.607021000  | -0.733989000 | 5.034609000  | 6 | -0.498450000 | -1.660776000 | 3.103525000  |
| 1                 | 0.819045000  | -0.207901000 | 3.113794000  | 6 | -0.992123000 | -2.771639000 | -2.969192000 |
| 1                 | 2.281868000  | 0.136901000  | 5.027995000  | 6 | -1.023772000 | -4.111115000 | 3.541986000  |
| 1                 | 1.268257000  | -0.919278000 | 6.072752000  | 6 | -1.491907000 | -5.126307000 | 4.381210000  |
| 6                 | 4.626105000  | -1.234489000 | 4.182995000  | 6 | -1.943204000 | -4.824649000 | 5.668917000  |
| 1                 | 5.624667000  | -1.661922000 | 4.375477000  | 6 | -1.919020000 | -3.496931000 | 6.110326000  |
| 1                 | 4.614534000  | -0.212007000 | 4.576973000  | 6 | -1.449904000 | -2.485632000 | 5.270183000  |
| 6                 | 3.597217000  | -2.099624000 | 4.933449000  | 7 | 1.438400000  | -0.672029000 | 1.905059000  |
| 1                 | 3.724372000  | -1.924517000 | 6.018955000  | 6 | 0.806336000  | -1.678271000 | 2.628250000  |
| 1                 | 3.795875000  | -3.166363000 | 4.755308000  | 6 | 1.727268000  | -2.783052000 | 2.819677000  |
| 8                 | 1.011415000  | -4.139394000 | 3.413600000  | 6 | 2.880386000  | -2.470371000 | 2.170673000  |
| 1                 | 1.175311000  | -3.403784000 | 4.034309000  | 6 | 2.722359000  | -1.134644000 | 1.639695000  |
| 1                 | 1.213298000  | -3.680320000 | 2.575989000  | 8 | -3.384217000 | 1.359015000  | -3.370591000 |
| 6                 | -0.140339000 | 0.850836000  | 0.704149000  | 1 | -0.683389000 | -4.363100000 | 2.538710000  |
| 8                 | 0.734197000  | -0.011953000 | 0.726513000  | 1 | -4.384034000 | 0.852836000  | 2.646032000  |
| 8                 | -0.713893000 | 1.476391000  | 1.621596000  | 1 | -3.318096000 | -1.468389000 | 3.581007000  |
| 8                 | -3.016764000 | 1.703776000  | 2.355211000  | 1 | -2.438199000 | 5.177610000  | 0.354756000  |
| 1                 | -3.598178000 | 0.905776000  | 2.042122000  | 1 | 0.034073000  | 6.036272000  | -0.300031000 |
| 1                 | -2.114205000 | 1.654601000  | 1.976569000  | 1 | 4.889789000  | 3.932582000  | -0.093429000 |
| 1                 | -2.960471000 | 1.717116000  | 3.326205000  | 1 | 5.837275000  | 1.413096000  | 0.346676000  |
|                   |              |              |              | 1 | 3.779984000  | -3.067568000 | 2.066459000  |
|                   |              |              |              | 1 | 1.507254000  | -3.688242000 | 3.377327000  |
|                   |              |              |              | 1 | -3.253038000 | 4.444083000  | 3.121805000  |
|                   |              |              |              | 1 | -5.485853000 | 5.516593000  | 3.345150000  |
|                   |              |              |              | 1 | -7.339122000 | 4.822465000  | 1.796838000  |
|                   |              |              |              | 1 | -6.887970000 | 3.098528000  | 0.043514000  |
|                   |              |              |              | 1 | 3.548623000  | 5.961803000  | 1.517957000  |
|                   |              |              |              | 1 | 4.522370000  | 8.046593000  | 0.572193000  |
|                   |              |              |              | 1 | 4.146628000  | 8.625504000  | -1.826383000 |
|                   |              |              |              | 1 | 2.793798000  | 7.101445000  | -3.268023000 |
|                   |              |              |              | 1 | 1.830835000  | 5.013488000  | -2.312358000 |
|                   |              |              |              | 1 | 5.871866000  | -0.850741000 | 2.771313000  |
|                   |              |              |              | 1 | 8.045341000  | -1.957554000 | 2.243975000  |
|                   |              |              |              | 1 | 8.467625000  | -2.803111000 | -0.071955000 |
|                   |              |              |              | 1 | 6.722172000  | -2.557157000 | -1.820464000 |
|                   |              |              |              | 1 | -1.508532000 | -6.157945000 | 4.021157000  |
|                   |              |              |              | 1 | -2.311222000 | -5.617370000 | 6.324577000  |
|                   |              |              |              | 1 | -2.262934000 | -3.247766000 | 7.117329000  |
|                   |              |              |              | 1 | -1.430086000 | -1.452336000 | 5.622691000  |
|                   |              |              |              | 1 | -2.959272000 | 2.442832000  | -1.239479000 |
|                   |              |              |              | 1 | -2.913178000 | 0.895855000  | -0.368919000 |
|                   |              |              |              | 1 | 3.359985000  | -2.026648000 | -3.095338000 |
| <b>5IM1 Н30+:</b> |              |              |              |   |              |              |              |
| 6                 | 2.417624000  | 5.685050000  | -1.681199000 |   |              |              |              |
| 6                 | 2.617282000  | 5.350408000  | -0.331523000 |   |              |              |              |
| 6                 | 3.384657000  | 6.213720000  | 0.467622000  |   |              |              |              |
| 6                 | 3.931684000  | 7.384147000  | -0.065449000 |   |              |              |              |
| 6                 | 3.720145000  | 7.710022000  | -1.409344000 |   |              |              |              |
| 6                 | 2.960693000  | 6.856704000  | -2.216088000 |   |              |              |              |
| 6                 | 2.041997000  | 4.093227000  | 0.231925000  |   |              |              |              |
| 6                 | 0.674098000  | 4.001816000  | 0.425526000  |   |              |              |              |
| 7                 | -0.023325000 | 2.925619000  | 0.961170000  |   |              |              |              |
| 6                 | -1.360657000 | 3.306405000  | 0.990650000  |   |              |              |              |
| 6                 | -1.497253000 | 4.642317000  | 0.449422000  |   |              |              |              |
| 6                 | -0.250594000 | 5.074418000  | 0.117817000  |   |              |              |              |
| 26                | 0.678121000  | 1.075883000  | 1.281720000  |   |              |              |              |
| 7                 | 2.556381000  | 1.749097000  | 0.885562000  |   |              |              |              |
| 6                 | 3.701520000  | 0.977532000  | 0.836665000  |   |              |              |              |
| 6                 | 4.817155000  | 1.772651000  | 0.453042000  |   |              |              |              |
| 6                 | 4.332939000  | 3.056330000  | 0.225013000  |   |              |              |              |
| 6                 | 2.931673000  | 3.017595000  | 0.480819000  |   |              |              |              |
| 6                 | 3.768009000  | -0.412406000 | 1.094918000  |   |              |              |              |
| 6                 | 5.063031000  | -1.092239000 | 0.795399000  |   |              |              |              |



|                              |              |              |              |    |              |              |              |
|------------------------------|--------------|--------------|--------------|----|--------------|--------------|--------------|
| 1                            | -1.169510000 | -6.426523000 | 3.666792000  | 6  | -1.467212000 | 6.711315000  | 2.230845000  |
| 1                            | -2.202003000 | -6.090061000 | 5.916516000  | 6  | -1.479737000 | 4.167329000  | -0.570187000 |
| 1                            | -2.422043000 | -3.777971000 | 6.835883000  | 6  | -0.150804000 | 3.933408000  | -0.980429000 |
| 1                            | -1.626786000 | -1.833648000 | 5.517210000  | 7  | 0.345536000  | 2.754082000  | -1.494531000 |
| 1                            | -2.961859000 | 2.358241000  | -1.100498000 | 6  | 1.692066000  | 2.928182000  | -1.713625000 |
| 1                            | -2.879869000 | 0.755157000  | -0.338327000 | 6  | 2.062678000  | 4.271171000  | -1.325357000 |
| 1                            | 3.502623000  | -1.759722000 | -3.051258000 | 6  | 0.925848000  | 4.891204000  | -0.877382000 |
| 1                            | 4.946555000  | -2.716222000 | -2.638422000 | 26 | -0.713850000 | 0.993408000  | -1.753309000 |
| 7                            | 2.036978000  | -3.613901000 | -1.785125000 | 7  | -2.462881000 | 1.988967000  | -1.203535000 |
| 8                            | 0.338772000  | -1.687989000 | -4.444566000 | 6  | -3.679279000 | 1.388435000  | -1.024056000 |
| 8                            | -0.987545000 | -3.986429000 | -1.312361000 | 6  | -4.598737000 | 2.335352000  | -0.417734000 |
| 8                            | -2.447773000 | -1.702072000 | -4.161943000 | 6  | -3.899874000 | 3.492290000  | -0.212495000 |
| 8                            | -3.608272000 | -3.082298000 | -1.305467000 | 6  | -2.548495000 | 3.259522000  | -0.696800000 |
| 6                            | -0.009230000 | -5.006103000 | -1.216756000 | 6  | -3.992631000 | 0.047346000  | -1.320069000 |
| 1                            | 0.011419000  | -5.511910000 | -2.192717000 | 6  | -5.302063000 | -0.465675000 | -0.814397000 |
| 6                            | 1.364656000  | -4.505493000 | -0.821515000 | 6  | -5.423341000 | -0.785069000 | 0.553138000  |
| 1                            | -0.313841000 | -5.758735000 | -0.467532000 | 6  | -6.618915000 | -1.304041000 | 1.058186000  |
| 1                            | 2.009160000  | -5.382666000 | -0.645733000 | 6  | -7.701460000 | -1.513547000 | 0.200509000  |
| 1                            | 1.312947000  | -3.981358000 | 0.145806000  | 6  | -7.599682000 | -1.199092000 | -1.157430000 |
| 6                            | -1.620851000 | -3.633083000 | -0.095385000 | 6  | -6.402578000 | -0.675977000 | -1.653745000 |
| 1                            | -2.066328000 | -4.535939000 | 0.363733000  | 6  | 2.589991000  | 1.946572000  | -2.187646000 |
| 1                            | -0.892421000 | -3.207754000 | 0.616985000  | 6  | 4.035362000  | 2.329886000  | -2.244782000 |
| 6                            | -2.683979000 | -2.590887000 | -0.348747000 | 6  | 4.475965000  | 3.204983000  | -3.253099000 |
| 1                            | -3.178970000 | -2.386956000 | 0.618953000  | 6  | 5.814350000  | 3.576968000  | -3.373268000 |
| 1                            | -2.213699000 | -1.655742000 | -0.692926000 | 6  | 6.750965000  | 3.069504000  | -2.466278000 |
| 6                            | -4.908541000 | -2.553565000 | -1.227314000 | 6  | 6.337958000  | 2.209956000  | -1.450927000 |
| 1                            | -5.471332000 | -3.007431000 | -2.056614000 | 6  | 4.990492000  | 1.838013000  | -1.330948000 |
| 1                            | -5.406806000 | -2.872052000 | -0.288418000 | 8  | 4.720507000  | 0.940728000  | -0.335906000 |
| 6                            | -5.017545000 | -1.029339000 | -1.264556000 | 6  | 3.545225000  | 1.022580000  | 0.463933000  |
| 1                            | -6.094974000 | -0.784436000 | -1.218022000 | 6  | 3.862858000  | 0.760074000  | 1.939403000  |
| 1                            | -4.575545000 | -0.620814000 | -0.352029000 | 7  | 4.509283000  | -0.386284000 | 2.295962000  |
| 6                            | 1.469085000  | -3.271019000 | -3.093810000 | 8  | -4.348955000 | -0.495854000 | 1.360647000  |
| 6                            | 0.767331000  | -1.919300000 | -3.114962000 | 6  | -3.943751000 | -1.375340000 | 2.400629000  |
| 1                            | 2.257681000  | -3.298989000 | -3.860206000 | 6  | -3.204054000 | -2.566976000 | 1.783734000  |
| 1                            | 0.734479000  | -4.029149000 | -3.385855000 | 8  | -3.652641000 | -3.059314000 | 0.751830000  |
| 1                            | 1.446833000  | -1.114069000 | -2.777813000 | 7  | 0.982073000  | 0.111300000  | -2.610796000 |
| 1                            | -0.078503000 | -1.933059000 | -2.415744000 | 6  | 2.246549000  | 0.643565000  | -2.593561000 |
| 6                            | -0.446271000 | -0.514206000 | -4.615374000 | 6  | 3.192782000  | -0.360475000 | -3.048251000 |
| 1                            | 0.043431000  | 0.144390000  | -5.356780000 | 6  | 2.475100000  | -1.489490000 | -3.323206000 |
| 6                            | -1.840974000 | -0.843557000 | -5.111093000 | 6  | 1.078193000  | -1.184567000 | -3.049429000 |
| 1                            | -0.525065000 | 0.034173000  | -3.665705000 | 6  | 0.008949000  | -2.099039000 | -3.174185000 |
| 1                            | -2.404713000 | 0.099363000  | -5.205448000 | 6  | 0.340431000  | -3.468205000 | -3.675108000 |
| 1                            | -1.806179000 | -1.343345000 | -6.099780000 | 6  | 0.209802000  | -4.591104000 | -2.840660000 |
| 6                            | -4.737219000 | -0.851535000 | -3.756263000 | 6  | 0.535889000  | -5.867895000 | -3.303764000 |
| 1                            | -5.772500000 | -1.231171000 | -3.754064000 | 6  | 0.995455000  | -6.043279000 | -4.612858000 |
| 1                            | -4.704463000 | 0.017346000  | -4.425124000 | 6  | 1.125664000  | -4.933864000 | -5.454223000 |
| 6                            | -3.827618000 | -1.962977000 | -4.297068000 | 6  | 0.801594000  | -3.656938000 | -4.988541000 |
| 1                            | -4.095127000 | -2.139039000 | -5.357238000 | 7  | -1.829765000 | -0.668488000 | -2.306236000 |
| 1                            | -3.988475000 | -2.899598000 | -3.750802000 | 6  | -1.337141000 | -1.842995000 | -2.824782000 |
| 8                            | -1.703614000 | -4.369315000 | -3.933045000 | 6  | -2.410497000 | -2.815349000 | -2.878424000 |
| 1                            | -1.730006000 | -3.426736000 | -4.188885000 | 6  | -3.514020000 | -2.230037000 | -2.319652000 |
| 1                            | -1.716853000 | -4.274346000 | -2.961223000 | 6  | -3.143989000 | -0.879941000 | -1.958223000 |
| 6                            | 0.074728000  | 0.642231000  | -0.775618000 | 8  | 3.499767000  | 1.596932000  | 2.764092000  |
| 8                            | -0.891825000 | 0.020936000  | -1.203025000 | 1  | -0.147223000 | -4.458841000 | -1.818097000 |
| 8                            | 0.790693000  | 1.313334000  | -1.766505000 | 1  | 4.266230000  | -0.216030000 | -3.140440000 |
| 8                            | 3.997382000  | 1.173442000  | -2.184591000 | 1  | 2.853807000  | -2.443781000 | -3.678276000 |
| 1                            | 4.211582000  | 0.166635000  | -1.875860000 | 1  | 3.063256000  | 4.690005000  | -1.386707000 |
| 1                            | 1.527864000  | 1.758284000  | -1.322589000 | 1  | 0.826640000  | 5.909193000  | -0.510315000 |
| 1                            | 4.244854000  | 1.768642000  | -1.409874000 | 1  | -4.260584000 | 4.418925000  | 0.226217000  |
| 1                            | 4.536199000  | 1.422187000  | -2.958784000 | 1  | -5.640207000 | 2.133817000  | -0.179161000 |
|                              |              |              |              | 1  | -4.491821000 | -2.673544000 | -2.158897000 |
|                              |              |              |              | 1  | -2.328786000 | -3.823552000 | -3.274237000 |
|                              |              |              |              | 1  | 3.737258000  | 3.586067000  | -3.961727000 |
|                              |              |              |              | 1  | 6.124824000  | 4.253821000  | -4.171808000 |
|                              |              |              |              | 1  | 7.804205000  | 3.348730000  | -2.544062000 |
|                              |              |              |              | 1  | 7.045598000  | 1.807296000  | -0.723905000 |
|                              |              |              |              | 1  | -2.870359000 | 6.401717000  | -1.383455000 |
| <b><sup>5</sup>IM2 H3O+:</b> |              |              |              |    |              |              |              |
| 6                            | -1.234677000 | 5.552217000  | 1.487261000  |    |              |              |              |
| 6                            | -1.737242000 | 5.433700000  | 0.179921000  |    |              |              |              |
| 6                            | -2.477879000 | 6.490369000  | -0.367911000 |    |              |              |              |
| 6                            | -2.708130000 | 7.651163000  | 0.376992000  |    |              |              |              |
| 6                            | -2.203725000 | 7.764070000  | 1.676460000  |    |              |              |              |







|    |              |              |              |                                 |              |              |              |
|----|--------------|--------------|--------------|---------------------------------|--------------|--------------|--------------|
| 1  | -0.470529000 | -5.106573000 | -1.661618000 | 8                               | -1.380288000 | -0.718662000 | 4.402254000  |
| 1  | 2.051538000  | -5.071062000 | -0.735547000 | 1                               | -1.032155000 | -1.249303000 | 3.661169000  |
| 1  | 5.884804000  | -1.415921000 | -0.881788000 | 1                               | -1.707472000 | 0.077941000  | 3.950119000  |
| 1  | 5.948288000  | 1.299569000  | -1.189243000 |                                 |              |              |              |
| 1  | -1.673611000 | 4.685064000  | -3.211053000 | <b><sup>3</sup>RC1 H3O+,K+:</b> |              |              |              |
| 1  | -3.443001000 | 6.435516000  | -3.191088000 | 6                               | 2.385704000  | 4.995257000  | -1.734917000 |
| 1  | -5.457630000 | 6.126742000  | -1.729606000 | 6                               | 1.149315000  | 4.803719000  | -2.379389000 |
| 1  | -5.666106000 | 4.115063000  | -0.330277000 | 6                               | 0.608753000  | 5.872554000  | -3.116214000 |
| 1  | -1.476919000 | -4.673912000 | -4.070907000 | 6                               | 1.286751000  | 7.089554000  | -3.217675000 |
| 1  | -3.259013000 | -6.398017000 | -4.238868000 | 6                               | 2.518738000  | 7.264136000  | -2.577444000 |
| 1  | -5.304374000 | -6.228815000 | -2.815851000 | 6                               | 3.065025000  | 6.212433000  | -1.835055000 |
| 1  | -5.539802000 | -4.314010000 | -1.224224000 | 6                               | 0.423411000  | 3.508214000  | -2.259201000 |
| 1  | -3.762196000 | -2.597428000 | -1.064441000 | 6                               | 1.050422000  | 2.346712000  | -2.685131000 |
| 1  | 4.529473000  | -4.646180000 | -1.920872000 | 7                               | 0.595141000  | 1.050007000  | -2.499169000 |
| 1  | 6.224897000  | -6.088355000 | -0.797239000 | 6                               | 1.626177000  | 0.217142000  | -2.882875000 |
| 1  | 6.871058000  | -5.625178000 | 1.572476000  | 6                               | 2.716546000  | 1.003738000  | -3.430107000 |
| 1  | 5.754708000  | -3.779197000 | 2.824195000  | 6                               | 2.356202000  | 2.311420000  | -3.327508000 |
| 1  | 6.735917000  | 4.518746000  | 1.191938000  | 26                              | -1.186248000 | 0.495113000  | -1.772946000 |
| 1  | 6.939974000  | 6.381546000  | -0.459444000 | 7                               | -1.684198000 | 2.426002000  | -1.463327000 |
| 1  | 5.458853000  | 6.408517000  | -2.471292000 | 6                               | -2.750244000 | 2.848457000  | -0.698806000 |
| 1  | 3.804847000  | 4.586015000  | -2.822871000 | 6                               | -2.571890000 | 4.215285000  | -0.313136000 |
| 1  | -5.216693000 | 2.546070000  | 1.289787000  | 6                               | -1.377650000 | 4.638387000  | -0.916417000 |
| 1  | -5.941088000 | 1.985336000  | -0.234614000 | 6                               | -0.839816000 | 3.521613000  | -1.600241000 |
| 1  | 4.347985000  | -1.624952000 | 3.739776000  | 6                               | -3.844625000 | 2.038024000  | -0.308197000 |
| 1  | 5.557119000  | -1.256372000 | 2.476870000  | 6                               | -4.751328000 | 2.507277000  | 0.776436000  |
| 7  | 2.570645000  | 0.235613000  | 2.366971000  | 6                               | -4.562651000 | 2.006645000  | 2.083691000  |
| 19 | -1.837020000 | 0.170885000  | 0.770725000  | 6                               | -5.394860000 | 2.387323000  | 3.138766000  |
| 8  | -0.381428000 | -1.833083000 | 2.042882000  | 6                               | -6.445549000 | 3.277439000  | 2.898999000  |
| 8  | -0.231756000 | 1.986717000  | 2.472041000  | 6                               | -6.646971000 | 3.797183000  | 1.617858000  |
| 8  | -3.212729000 | -2.148579000 | 1.902260000  | 6                               | -5.800125000 | 3.415253000  | 0.573533000  |
| 8  | -2.921003000 | 1.303463000  | 3.100837000  | 6                               | 1.644180000  | -1.166742000 | -2.766375000 |
| 6  | 1.149662000  | 2.321752000  | 2.606848000  | 6                               | 2.913923000  | -1.911239000 | -2.989990000 |
| 1  | 1.451366000  | 2.258105000  | 3.669508000  | 6                               | 3.055995000  | -2.763252000 | -4.101110000 |
| 6  | 2.032747000  | 1.438680000  | 1.740949000  | 6                               | 4.215071000  | -3.508260000 | -4.314600000 |
| 1  | 1.281555000  | 3.370904000  | 2.284680000  | 6                               | 5.268234000  | -3.425964000 | -3.397932000 |
| 1  | 2.891480000  | 2.024752000  | 1.407819000  | 6                               | 5.152445000  | -2.592927000 | -2.285579000 |
| 1  | 1.482506000  | 1.162450000  | 0.828787000  | 6                               | 3.989637000  | -1.837702000 | -2.085494000 |
| 6  | -1.051310000 | 2.827259000  | 3.264277000  | 8                               | 3.890142000  | -1.036797000 | -0.954648000 |
| 1  | -0.904132000 | 2.600922000  | 4.337874000  | 6                               | 4.786721000  | 0.074561000  | -0.942059000 |
| 1  | -0.779784000 | 3.888386000  | 3.104299000  | 6                               | 4.849570000  | 0.748384000  | 0.426551000  |
| 6  | -2.506244000 | 2.654471000  | 2.889559000  | 7                               | 5.311667000  | 0.032546000  | 1.499878000  |
| 1  | -3.115299000 | 3.345625000  | 3.492982000  | 8                               | -3.463499000 | 1.179479000  | 2.299427000  |
| 1  | -2.656867000 | 2.907594000  | 1.827173000  | 6                               | -3.595531000 | 0.048692000  | 3.184270000  |
| 6  | -4.005150000 | 1.054414000  | 3.989535000  | 6                               | -3.089762000 | -1.213804000 | 2.465388000  |
| 1  | -3.757571000 | 0.122999000  | 4.514261000  | 8                               | -3.810361000 | -1.696815000 | 1.596552000  |
| 1  | -4.078369000 | 1.853458000  | 4.745672000  | 7                               | -0.786480000 | -1.400141000 | -2.346965000 |
| 6  | -5.344109000 | 0.921533000  | 3.262538000  | 6                               | 0.483472000  | -1.925581000 | -2.484115000 |
| 1  | -6.090007000 | 0.555378000  | 3.984842000  | 6                               | 0.445620000  | -3.350372000 | -2.386760000 |
| 1  | -5.697674000 | 1.904470000  | 2.934965000  | 6                               | -0.882612000 | -3.700418000 | -2.227533000 |
| 6  | 1.614717000  | -0.764892000 | 2.818210000  | 6                               | -1.631101000 | -2.484856000 | -2.202715000 |
| 6  | 0.991106000  | -1.607146000 | 1.704327000  | 6                               | -3.031184000 | -2.421490000 | -1.990745000 |
| 1  | 2.082360000  | -1.410517000 | 3.571480000  | 6                               | -3.782987000 | -3.708896000 | -1.964617000 |
| 1  | 0.802065000  | -0.234965000 | 3.334832000  | 6                               | -4.365500000 | -4.158771000 | -0.765255000 |
| 1  | 1.506316000  | -2.568038000 | 1.592051000  | 6                               | -5.047446000 | -5.378149000 | -0.721540000 |
| 1  | 1.060384000  | -1.093050000 | 0.733100000  | 6                               | -5.156956000 | -6.167085000 | -1.871678000 |
| 6  | -1.000614000 | -2.917435000 | 1.363108000  | 6                               | -4.576913000 | -5.730225000 | -3.067708000 |
| 1  | -0.350313000 | -3.807635000 | 1.396527000  | 6                               | -3.891877000 | -4.512897000 | -3.111450000 |
| 6  | -2.307374000 | -3.232506000 | 2.043198000  | 7                               | -3.079103000 | -0.020748000 | -1.415183000 |
| 1  | -1.156496000 | -2.674986000 | 0.297786000  | 6                               | -3.687601000 | -1.251024000 | -1.651706000 |
| 1  | -2.737853000 | -4.148246000 | 1.595909000  | 6                               | -5.091209000 | -1.177296000 | -1.292530000 |
| 1  | -2.116787000 | -3.433388000 | 3.113348000  | 6                               | -5.291746000 | 0.037054000  | -0.716477000 |
| 6  | -5.488106000 | -1.426963000 | 2.400374000  | 6                               | -4.031922000 | 0.750775000  | -0.794097000 |
| 1  | -6.252939000 | -1.530016000 | 3.185584000  | 8                               | 4.523969000  | 1.929066000  | 0.515006000  |
| 1  | -5.871191000 | -1.882778000 | 1.479475000  | 1                               | -4.265280000 | -3.538621000 | 0.128474000  |
| 6  | -4.260095000 | -2.203288000 | 2.855521000  | 1                               | 1.305722000  | -4.011691000 | -2.446931000 |
| 1  | -4.590365000 | -3.248884000 | 2.997920000  | 1                               | -1.300664000 | -4.698021000 | -2.122234000 |
| 1  | -3.879982000 | -1.846580000 | 3.828770000  | 1                               | 3.621501000  | 0.589127000  | -3.868513000 |



|    |              |              |              |                                 |              |              |              |
|----|--------------|--------------|--------------|---------------------------------|--------------|--------------|--------------|
| 6  | -5.228288000 | -1.070288000 | -0.912797000 | 1                               | 1.225547000  | 2.546474000  | 3.107925000  |
| 6  | -5.319073000 | 0.184746000  | -0.400614000 | 1                               | 3.361126000  | 3.115282000  | 4.359148000  |
| 6  | -4.047235000 | 0.832229000  | -0.656816000 | 1                               | 3.254748000  | 1.529988000  | 5.181949000  |
| 8  | 4.241491000  | 1.676600000  | -0.141644000 | 6                               | 5.698280000  | 0.933249000  | 2.045085000  |
| 1  | -4.266769000 | -3.436663000 | 0.487397000  | 1                               | 6.738693000  | 0.642231000  | 2.265018000  |
| 1  | 0.795070000  | -4.296826000 | -2.802204000 | 1                               | 5.715596000  | 1.911159000  | 1.549488000  |
| 1  | -1.792608000 | -4.830706000 | -2.247015000 | 6                               | 4.962541000  | 1.092066000  | 3.366266000  |
| 1  | 3.312684000  | 0.157799000  | -4.244110000 | 1                               | 5.485977000  | 1.888721000  | 3.926318000  |
| 1  | 2.800309000  | 2.797948000  | -4.007094000 | 1                               | 4.997548000  | 0.183111000  | 3.990415000  |
| 1  | -0.865145000 | 5.613573000  | -1.308559000 | 8                               | 2.884660000  | -1.125083000 | 5.284377000  |
| 1  | -3.160867000 | 4.959556000  | -0.031669000 | 1                               | 2.207032000  | -0.523433000 | 4.927503000  |
| 1  | -6.171870000 | 0.659688000  | 0.078461000  | 1                               | 3.360809000  | -1.467672000 | 4.508077000  |
| 1  | -5.992262000 | -1.842399000 | -0.932037000 | 6                               | -0.259156000 | -0.008594000 | -0.049881000 |
| 1  | 1.734034000  | -3.188285000 | -5.058794000 | 8                               | 0.212576000  | -1.124089000 | 0.184284000  |
| 1  | 3.732049000  | -4.601598000 | -5.489462000 | 8                               | 0.369423000  | 0.993401000  | 0.693664000  |
| 1  | 5.682772000  | -4.495847000 | -3.920126000 | 8                               | -0.975309000 | 3.091661000  | 1.727673000  |
| 1  | 5.610638000  | -2.958618000 | -1.971398000 | 1                               | -1.758982000 | 2.554365000  | 1.948592000  |
| 1  | -0.214608000 | 5.544383000  | -3.964840000 | 1                               | -0.152126000 | 1.824955000  | 0.721028000  |
| 1  | 1.152673000  | 7.602951000  | -4.231656000 | 1                               | -1.316960000 | 3.759676000  | 1.109387000  |
| 1  | 3.376921000  | 7.780673000  | -3.113353000 |                                 |              |              |              |
| 1  | 4.219795000  | 5.880876000  | -1.730489000 |                                 |              |              |              |
| 1  | 2.849992000  | 3.823864000  | -1.470048000 |                                 |              |              |              |
| 1  | -5.802189000 | 4.045320000  | -0.392989000 |                                 |              |              |              |
| 1  | -7.167422000 | 4.878606000  | 1.522778000  |                                 |              |              |              |
| 1  | -6.734413000 | 4.002041000  | 3.821428000  |                                 |              |              |              |
| 1  | -4.926286000 | 2.346183000  | 4.204768000  |                                 |              |              |              |
| 1  | -5.591864000 | -5.527649000 | 0.836544000  |                                 |              |              |              |
| 1  | -6.212851000 | -6.949859000 | -1.118009000 |                                 |              |              |              |
| 1  | -5.502296000 | -6.277108000 | -3.413135000 |                                 |              |              |              |
| 1  | -4.179737000 | -4.196101000 | -3.748071000 |                                 |              |              |              |
| 1  | 5.625857000  | -0.757098000 | -1.516669000 |                                 |              |              |              |
| 1  | 4.400762000  | 0.367674000  | -2.174563000 |                                 |              |              |              |
| 1  | -2.904449000 | 0.711443000  | 4.202944000  |                                 |              |              |              |
| 1  | -4.429809000 | 0.125328000  | 3.497122000  |                                 |              |              |              |
| 7  | -1.606501000 | -1.416944000 | 3.167329000  |                                 |              |              |              |
| 19 | 2.190718000  | -0.534086000 | 1.839555000  |                                 |              |              |              |
| 8  | 1.030513000  | 0.738384000  | 4.111317000  |                                 |              |              |              |
| 8  | 1.226056000  | -2.923249000 | 2.910298000  |                                 |              |              |              |
| 8  | 3.613904000  | 1.450978000  | 3.138585000  |                                 |              |              |              |
| 8  | 4.118806000  | -2.242415000 | 2.893468000  |                                 |              |              |              |
| 6  | -0.059797000 | -3.445788000 | 3.227488000  |                                 |              |              |              |
| 1  | -0.199439000 | -3.490954000 | 4.323982000  |                                 |              |              |              |
| 6  | -1.172481000 | -2.682018000 | 2.542292000  |                                 |              |              |              |
| 1  | -0.115618000 | -4.485621000 | 2.857597000  |                                 |              |              |              |
| 1  | -2.050808000 | -3.342958000 | 2.507267000  |                                 |              |              |              |
| 1  | -0.875864000 | -2.478138000 | 1.502463000  |                                 |              |              |              |
| 6  | 2.279426000  | -3.756891000 | 3.367125000  |                                 |              |              |              |
| 1  | 2.455343000  | -3.596730000 | 4.445705000  |                                 |              |              |              |
| 1  | 2.006739000  | -4.817567000 | 3.218450000  |                                 |              |              |              |
| 6  | 3.551499000  | -3.518342000 | 2.584718000  |                                 |              |              |              |
| 1  | 4.269972000  | -4.310388000 | 2.856065000  |                                 |              |              |              |
| 1  | 3.347194000  | -3.596893000 | 1.501490000  |                                 |              |              |              |
| 6  | 5.476605000  | -2.074492000 | 2.487068000  |                                 |              |              |              |
| 1  | 5.979376000  | -1.497550000 | 3.274358000  |                                 |              |              |              |
| 1  | 5.975966000  | -3.055880000 | 2.442186000  |                                 |              |              |              |
| 6  | 5.641050000  | -1.405943000 | 1.124389000  |                                 |              |              |              |
| 1  | 6.716573000  | -1.442902000 | 0.870124000  |                                 |              |              |              |
| 1  | 5.097405000  | -1.997585000 | 0.379288000  |                                 |              |              |              |
| 6  | -0.839180000 | -0.780445000 | 4.238031000  |                                 |              |              |              |
| 6  | -0.376326000 | 0.646371000  | 3.918477000  |                                 |              |              |              |
| 1  | -1.403382000 | -0.805886000 | 5.183112000  |                                 |              |              |              |
| 1  | 0.061616000  | -1.379025000 | 4.405619000  |                                 |              |              |              |
| 1  | -0.873047000 | 1.387214000  | 4.568211000  |                                 |              |              |              |
| 1  | -0.607450000 | 0.889028000  | 2.872515000  |                                 |              |              |              |
| 6  | 1.507188000  | 2.080524000  | 4.067759000  |                                 |              |              |              |
| 1  | 1.042534000  | 2.669059000  | 4.880064000  |                                 |              |              |              |
| 6  | 3.002126000  | 2.074410000  | 4.255086000  |                                 |              |              |              |
|    |              |              |              | <b><sup>3</sup>RC2 H30+,K+:</b> |              |              |              |
| 6  |              |              |              | 6                               | 2.118630000  | 5.429997000  | -1.093948000 |
| 6  |              |              |              | 6                               | 0.869235000  | 5.276712000  | -1.721996000 |
| 6  |              |              |              | 6                               | 0.224782000  | 6.417480000  | -2.229894000 |
| 6  |              |              |              | 6                               | 0.818738000  | 7.677639000  | -2.124466000 |
| 6  |              |              |              | 6                               | 2.063644000  | 7.817651000  | -1.502655000 |
| 6  |              |              |              | 6                               | 2.710549000  | 6.690302000  | -0.985434000 |
| 6  |              |              |              | 6                               | 0.232093000  | 3.933356000  | -1.816047000 |
| 6  |              |              |              | 6                               | 0.916794000  | 2.909049000  | -2.474970000 |
| 7  |              |              |              | 7                               | 0.574372000  | 1.562845000  | -2.426863000 |
| 6  |              |              |              | 6                               | 1.653965000  | 0.870321000  | -2.936025000 |
| 6  |              |              |              | 6                               | 2.660743000  | 1.800636000  | -3.403613000 |
| 6  |              |              |              | 6                               | 2.198066000  | 3.056597000  | -3.138953000 |
| 26 |              |              |              | 6                               | -1.142154000 | 0.764066000  | -1.781835000 |
| 7  |              |              |              | 7                               | -1.764703000 | 2.595315000  | -1.188964000 |
| 6  |              |              |              | 6                               | -2.807061000 | 2.774094000  | -0.310366000 |
| 6  |              |              |              | 6                               | -2.669946000 | 4.045864000  | 0.359688000  |
| 6  |              |              |              | 6                               | -1.545975000 | 4.648070000  | -0.176507000 |
| 6  |              |              |              | 6                               | -0.988113000 | 3.730569000  | -1.127358000 |
| 6  |              |              |              | 6                               | -3.867456000 | 1.872370000  | -0.119604000 |
| 6  |              |              |              | 6                               | -4.870756000 | 2.111189000  | 0.959803000  |
| 6  |              |              |              | 6                               | -4.743563000 | 1.432206000  | 2.188583000  |
| 6  |              |              |              | 6                               | -5.682593000 | 1.579842000  | 3.209087000  |
| 6  |              |              |              | 6                               | -6.788002000 | 2.410149000  | 3.006283000  |
| 6  |              |              |              | 6                               | -6.932107000 | 3.105549000  | 1.803101000  |
| 6  |              |              |              | 6                               | -5.975663000 | 2.958132000  | 0.795407000  |
| 6  |              |              |              | 6                               | 1.789585000  | -0.519814000 | -2.941444000 |
| 6  |              |              |              | 6                               | 3.119853000  | -1.111995000 | -3.260183000 |
| 6  |              |              |              | 6                               | 3.367938000  | -1.708281000 | -4.507091000 |
| 6  |              |              |              | 6                               | 4.609723000  | -2.268831000 | -4.808604000 |
| 6  |              |              |              | 6                               | 5.628563000  | -2.249480000 | -3.851096000 |
| 6  |              |              |              | 6                               | 5.399682000  | -1.673596000 | -2.600704000 |
| 6  |              |              |              | 6                               | 4.152577000  | -1.108630000 | -2.307606000 |
| 8  |              |              |              | 8                               | 3.906198000  | -0.585006000 | -1.049644000 |
| 6  |              |              |              | 6                               | 4.621707000  | 0.605830000  | -0.735005000 |
| 6  |              |              |              | 6                               | 4.622021000  | 0.929652000  | 0.759736000  |
| 7  |              |              |              | 7                               | 5.105587000  | 0.005632000  | 1.657147000  |
| 8  |              |              |              | 8                               | -3.582929000 | 0.679662000  | 2.391339000  |
| 6  |              |              |              | 6                               | -3.638658000 | -0.608843000 | 3.052438000  |
| 6  |              |              |              | 6                               | -3.037645000 | -1.644742000 | 2.091316000  |
| 8  |              |              |              | 8                               | -3.650969000 | -1.830514000 | 1.044603000  |
| 7  |              |              |              | 7                               | -0.588450000 | -1.013968000 | -2.511896000 |
| 6  |              |              |              | 6                               | 0.720065000  | -1.397703000 | -2.704682000 |
| 6  |              |              |              | 6                               | 0.807807000  | -2.835038000 | -2.764887000 |
| 6  |              |              |              | 6                               | -0.475245000 | -3.310755000 | -2.668005000 |
| 6  |              |              |              | 6                               | -1.338845000 | -2.166562000 | -2.521079000 |
| 6  |              |              |              | 6                               | -2.740664000 | -2.225811000 | -2.386073000 |









|   |              |              |              |                                 |              |              |              |
|---|--------------|--------------|--------------|---------------------------------|--------------|--------------|--------------|
| 6 | -3.123878000 | 2.495093000  | -0.747815000 | 1                               | 5.339918000  | -0.951679000 | -1.265099000 |
| 6 | -4.100627000 | 3.420757000  | -0.111135000 | 1                               | -4.584197000 | 1.434631000  | 3.721958000  |
| 6 | -4.559917000 | 3.149715000  | 1.202062000  | 1                               | -5.718640000 | 1.182142000  | 2.365128000  |
| 6 | -5.558741000 | 3.926477000  | 1.797994000  | 7                               | -2.766006000 | -0.382649000 | 2.334061000  |
| 6 | -6.102054000 | 5.012570000  | 1.102615000  | 19                              | 1.736007000  | -0.262808000 | 0.963768000  |
| 6 | -5.638623000 | 5.323824000  | -0.178259000 | 8                               | 0.218293000  | 1.684619000  | 2.260803000  |
| 6 | -4.650670000 | 4.529316000  | -0.771507000 | 8                               | 0.023068000  | -2.137163000 | 2.409335000  |
| 6 | 1.664796000  | -2.313086000 | -1.717856000 | 8                               | 3.032819000  | 2.021971000  | 2.145332000  |
| 6 | 2.755121000  | -3.313946000 | -1.638529000 | 8                               | 2.727955000  | -1.591398000 | 3.241771000  |
| 6 | 2.693015000  | -4.520222000 | -2.369440000 | 6                               | -1.359645000 | -2.487121000 | 2.479559000  |
| 6 | 3.684202000  | -5.497662000 | -2.288524000 | 1                               | -1.692099000 | -2.502182000 | 3.534897000  |
| 6 | 4.789296000  | -5.296683000 | -1.455773000 | 6                               | -2.222425000 | -1.552255000 | 1.651068000  |
| 6 | 4.889914000  | -4.110581000 | -0.725541000 | 1                               | -1.474319000 | -3.509304000 | 2.076054000  |
| 6 | 3.896112000  | -3.130298000 | -0.821051000 | 1                               | -3.077031000 | -2.114037000 | 1.268804000  |
| 8 | 3.999693000  | -1.974519000 | -0.058903000 | 1                               | -1.651306000 | -1.227660000 | 0.769131000  |
| 6 | 5.221157000  | -1.256639000 | -0.218657000 | 6                               | 0.824342000  | -3.065035000 | 3.115685000  |
| 6 | 5.218302000  | 0.026432000  | 0.605039000  | 1                               | 0.658131000  | -2.962979000 | 4.205182000  |
| 7 | 5.039400000  | -0.070917000 | 1.961220000  | 1                               | 0.550236000  | -4.098230000 | 2.828886000  |
| 8 | -3.934211000 | 2.140659000  | 1.874901000  | 6                               | 2.289278000  | -2.877080000 | 2.800538000  |
| 6 | -4.656149000 | 1.197723000  | 2.644797000  | 1                               | 2.856283000  | -3.665760000 | 3.321751000  |
| 6 | -4.118781000 | -0.207888000 | 2.347559000  | 1                               | 2.474327000  | -2.992382000 | 1.718705000  |
| 8 | -4.916881000 | -1.109309000 | 2.103858000  | 6                               | 4.051228000  | -1.518545000 | 3.757951000  |
| 7 | -0.787411000 | -1.911878000 | -1.586729000 | 1                               | 4.060468000  | -0.683668000 | 4.471016000  |
| 6 | 0.340396000  | -2.719637000 | -1.438424000 | 1                               | 4.281439000  | -2.434902000 | 4.327335000  |
| 6 | -0.060936000 | -4.040208000 | -1.066058000 | 6                               | 5.122583000  | -1.337771000 | 2.689988000  |
| 6 | -1.445372000 | -4.062028000 | -1.075493000 | 1                               | 6.104362000  | -1.404337000 | 3.193360000  |
| 6 | -1.888477000 | -2.745834000 | -1.405258000 | 1                               | 5.057830000  | -2.170791000 | 1.984737000  |
| 6 | -3.244537000 | -2.349989000 | -1.450997000 | 6                               | -1.808084000 | 0.565603000  | 2.884700000  |
| 6 | -4.276632000 | -3.419007000 | -1.389846000 | 6                               | -1.127633000 | 1.449348000  | 1.841059000  |
| 6 | -5.202286000 | -3.491196000 | -0.327612000 | 1                               | -2.292744000 | 1.180448000  | 3.653018000  |
| 6 | -6.147583000 | -4.519286000 | -0.267911000 | 1                               | -1.028495000 | -0.013150000 | 3.400792000  |
| 6 | -6.192729000 | -5.503357000 | -1.261955000 | 1                               | -1.649437000 | 2.405067000  | 1.727920000  |
| 6 | -5.276995000 | -5.449452000 | -2.318950000 | 1                               | -1.136472000 | 0.964770000  | 0.852338000  |
| 6 | -4.333423000 | -4.420963000 | -2.378978000 | 6                               | 0.824454000  | 2.821557000  | 1.656946000  |
| 7 | -2.774044000 | 0.083756000  | -1.270527000 | 1                               | 0.163457000  | 3.699672000  | 1.753217000  |
| 6 | -3.639664000 | -1.002106000 | -1.390344000 | 6                               | 2.128168000  | 3.096265000  | 2.358812000  |
| 6 | -4.993877000 | -0.547878000 | -1.280041000 | 1                               | 0.976764000  | 2.655318000  | 0.576677000  |
| 6 | -4.948573000 | 0.799768000  | -0.992786000 | 1                               | 2.559536000  | 4.040902000  | 1.978911000  |
| 6 | -3.570881000 | 1.184272000  | -0.988224000 | 1                               | 1.930744000  | 3.220663000  | 3.437879000  |
| 8 | 5.400593000  | 1.097885000  | 0.037830000  | 6                               | 5.217573000  | 1.159942000  | 2.735005000  |
| 1 | -5.165166000 | -2.737451000 | 0.461877000  | 1                               | 5.845190000  | 0.937298000  | 3.612800000  |
| 1 | 0.609765000  | -4.865067000 | -0.840991000 | 1                               | 5.762498000  | 1.863301000  | 2.094364000  |
| 1 | -2.095613000 | -4.903952000 | -0.851361000 | 6                               | 3.940748000  | 1.830764000  | 3.219614000  |
| 1 | 3.979076000  | -1.310805000 | -3.086344000 | 1                               | 4.237268000  | 2.803185000  | 3.651976000  |
| 1 | 3.916552000  | 1.386632000  | -3.395797000 | 1                               | 3.430255000  | 1.259023000  | 4.012047000  |
| 1 | 0.610721000  | 5.160165000  | -1.433271000 | 8                               | 1.174703000  | 0.363802000  | 4.591500000  |
| 1 | -1.940893000 | 5.103624000  | -0.522146000 | 1                               | 0.853744000  | 0.903960000  | 3.845713000  |
| 1 | -5.785381000 | 1.473451000  | -0.821157000 | 1                               | 1.604490000  | -0.394777000 | 4.156613000  |
| 1 | -5.875999000 | -1.175929000 | -1.368429000 |                                 |              |              |              |
| 1 | 1.835728000  | -4.673910000 | -3.026854000 | <b><sup>5</sup>RC1 H3O+,K+:</b> |              |              |              |
| 1 | 3.597977000  | -6.412057000 | -2.880367000 | 6                               | 2.531755000  | 4.638524000  | -2.050320000 |
| 1 | 5.571751000  | -6.054208000 | -1.372189000 | 6                               | 1.292543000  | 4.486698000  | -2.701553000 |
| 1 | 5.744074000  | -3.953028000 | -0.064647000 | 6                               | 0.817539000  | 5.553172000  | -3.486447000 |
| 1 | 1.411966000  | 4.709361000  | -3.944787000 | 6                               | 1.558803000  | 6.728837000  | -3.624778000 |
| 1 | 3.116883000  | 6.475146000  | -4.312652000 | 6                               | 2.791059000  | 6.864637000  | -2.975581000 |
| 1 | 5.286130000  | 6.402863000  | -3.073816000 | 6                               | 3.274038000  | 5.814561000  | -2.188224000 |
| 1 | 5.716691000  | 4.539740000  | -1.461868000 | 6                               | 0.506777000  | 3.230255000  | -2.545564000 |
| 1 | 4.013838000  | 2.785390000  | -1.096652000 | 6                               | 1.120164000  | 2.030508000  | -2.906809000 |
| 1 | -4.309961000 | 4.749457000  | -1.785837000 | 7                               | 0.632960000  | 0.755338000  | -2.681402000 |
| 1 | -6.056655000 | 6.173462000  | -0.723286000 | 6                               | 1.593347000  | -0.138494000 | -3.095357000 |
| 1 | -6.880638000 | 5.619314000  | 1.571386000  | 6                               | 2.704655000  | 0.597301000  | -3.680717000 |
| 1 | -5.893007000 | 3.694578000  | 2.811469000  | 6                               | 2.411863000  | 1.923359000  | -3.576389000 |
| 1 | -6.850242000 | -4.557891000 | 0.569295000  | 26                              | -1.172021000 | 0.241114000  | -1.833640000 |
| 1 | -6.932529000 | -6.306362000 | -1.212502000 | 7                               | -1.681830000 | 2.295232000  | -1.771742000 |
| 1 | -5.301716000 | -6.209833000 | -3.104311000 | 6                               | -2.771504000 | 2.782630000  | -1.091569000 |
| 1 | -3.622064000 | -4.383143000 | -3.207259000 | 6                               | -2.585460000 | 4.181060000  | -0.829812000 |
| 1 | 6.089567000  | -1.870359000 | 0.075027000  | 6                               | -1.344842000 | 4.528176000  | -1.390539000 |





|    |              |              |              |               |              |              |              |
|----|--------------|--------------|--------------|---------------|--------------|--------------|--------------|
| 6  | 1.431326000  | 0.092020000  | -3.235710000 | 1             | -6.029606000 | 3.842427000  | -0.530937000 |
| 6  | 2.531845000  | 0.851348000  | -3.805569000 | 1             | -7.440555000 | 4.612652000  | 1.379065000  |
| 6  | 2.244561000  | 2.172890000  | -3.610403000 | 1             | -6.962875000 | 3.774448000  | 3.683161000  |
| 26 | -1.273649000 | 0.374504000  | -1.755464000 | 1             | -5.072986000 | 2.217832000  | 0.077636000  |
| 7  | -1.770440000 | 2.415857000  | -1.622059000 | 1             | -5.306610000 | -5.666309000 | 0.846866000  |
| 6  | -2.832259000 | 2.854961000  | -0.875083000 | 1             | -5.817451000 | -7.187124000 | -1.065063000 |
| 6  | -2.664669000 | 4.265027000  | -0.592748000 | 1             | -5.125936000 | -6.545142000 | -3.375007000 |
| 6  | -1.479838000 | 4.648898000  | -1.176321000 | 1             | -3.932871000 | -4.397899000 | -3.766879000 |
| 6  | -0.915117000 | 3.473503000  | -1.806947000 | 1             | 5.633583000  | -0.645245000 | -1.504574000 |
| 6  | -3.907878000 | 2.057777000  | -0.422317000 | 1             | 4.416716000  | 0.486269000  | -2.166092000 |
| 6  | -4.767404000 | 2.593903000  | 0.676221000  | 1             | -2.915328000 | 0.759743000  | 4.089122000  |
| 6  | -4.506079000 | 2.137318000  | 1.990072000  | 1             | -4.422514000 | 0.057575000  | 3.458115000  |
| 6  | -5.291578000 | 2.560717000  | 3.065479000  | 7             | -1.589674000 | -1.417695000 | 3.172549000  |
| 6  | -6.350834000 | 3.446771000  | 2.839779000  | 19            | 2.158915000  | -0.557014000 | 1.944473000  |
| 6  | -6.615959000 | 3.918272000  | 1.552793000  | 8             | 0.989238000  | 0.689722000  | 4.204109000  |
| 6  | -5.822196000 | 3.491233000  | 0.482304000  | 8             | 1.242042000  | -2.931049000 | 2.987393000  |
| 6  | 1.359708000  | -1.314509000 | -3.188722000 | 8             | 3.572805000  | 1.421866000  | 3.208187000  |
| 6  | 2.611062000  | -2.081613000 | -3.464404000 | 8             | 4.125606000  | -2.248006000 | 2.915464000  |
| 6  | 2.712257000  | -2.900102000 | -4.603230000 | 6             | -0.043857000 | -3.452874000 | 3.299984000  |
| 6  | 3.851875000  | -3.661809000 | -4.861912000 | 1             | -0.193482000 | -3.486768000 | 4.395403000  |
| 6  | 4.921922000  | -3.630059000 | -3.962774000 | 6             | -1.151361000 | -2.703361000 | 2.591467000  |
| 6  | 4.845842000  | -2.829513000 | -2.822778000 | 1             | -0.095263000 | -4.497115000 | 2.942024000  |
| 6  | 3.706827000  | -2.053035000 | -2.576258000 | 1             | -2.029198000 | -3.366562000 | 2.567375000  |
| 8  | 3.644909000  | -1.285203000 | -1.424735000 | 1             | -0.849914000 | -2.527729000 | 1.548412000  |
| 6  | 4.615777000  | -0.242860000 | -1.370389000 | 6             | 2.299240000  | -3.763229000 | 3.439173000  |
| 6  | 4.565356000  | 0.556928000  | -0.065956000 | 1             | 2.487496000  | -3.593749000 | 4.513944000  |
| 7  | 5.090965000  | -0.000954000 | 1.080077000  | 1             | 2.023544000  | -4.824569000 | 3.302177000  |
| 8  | -3.414131000 | 1.314723000  | 2.148447000  | 6             | 3.561325000  | -3.532414000 | 2.637627000  |
| 6  | -3.393331000 | 0.342843000  | 3.193601000  | 1             | 4.287029000  | -4.316115000 | 2.914382000  |
| 6  | -2.743620000 | -0.934634000 | 2.632684000  | 1             | 3.343469000  | -3.631065000 | 1.558809000  |
| 8  | -3.322830000 | -1.511209000 | 1.717427000  | 6             | 5.467427000  | -2.070301000 | 2.461416000  |
| 7  | -1.042334000 | -1.551470000 | -2.610395000 | 1             | 5.997781000  | -1.503185000 | 3.237905000  |
| 6  | 0.201085000  | -2.064335000 | -2.885145000 | 1             | 5.967128000  | -3.049128000 | 2.384854000  |
| 6  | 0.150451000  | -3.510991000 | -2.808841000 | 6             | 5.586727000  | -1.382000000 | 1.103012000  |
| 6  | -1.136789000 | -3.847312000 | -2.486916000 | 1             | 6.655791000  | -1.410839000 | 0.820493000  |
| 6  | -1.875236000 | -2.607265000 | -2.345418000 | 1             | 5.027024000  | -1.964903000 | 0.361974000  |
| 6  | -3.218993000 | -2.526395000 | -1.900321000 | 6             | -0.910815000 | -0.807423000 | 4.316781000  |
| 6  | -3.949365000 | -3.810391000 | -1.688152000 | 6             | -0.428429000 | 0.630860000  | 4.088304000  |
| 6  | -4.344054000 | -4.180884000 | -0.388952000 | 1             | -1.551088000 | -0.858393000 | 5.211041000  |
| 6  | -5.010930000 | -5.388433000 | -0.168009000 | 1             | -0.025726000 | -1.409989000 | 4.544565000  |
| 6  | -5.294976000 | -6.243274000 | -1.238802000 | 1             | -0.871501000 | 1.315490000  | 4.832871000  |
| 6  | -4.905095000 | -5.884249000 | -2.533172000 | 1             | -0.711950000 | 0.976706000  | 3.085207000  |
| 6  | -4.235104000 | -4.677865000 | -2.755175000 | 6             | 1.475724000  | 2.029228000  | 4.175342000  |
| 7  | -3.274126000 | -0.112093000 | -1.416236000 | 1             | 1.024017000  | 2.607871000  | 5.001797000  |
| 6  | -3.868965000 | -1.342187000 | -1.506687000 | 6             | 2.973235000  | 2.021120000  | 4.344143000  |
| 6  | -5.231966000 | -1.254905000 | -0.998031000 | 1             | 1.184778000  | 2.510487000  | 3.225183000  |
| 6  | -5.396175000 | 0.012299000  | -0.523356000 | 1             | 3.329824000  | 3.061225000  | 4.463112000  |
| 6  | -4.155460000 | 0.723521000  | -0.789280000 | 1             | 3.238422000  | 1.459880000  | 5.257019000  |
| 8  | 4.147572000  | 1.708895000  | -0.091353000 | 6             | 5.640433000  | 0.942339000  | 2.067296000  |
| 1  | -4.109850000 | -3.510538000 | 0.441543000  | 1             | 6.687963000  | 0.659343000  | 2.263572000  |
| 1  | 0.987798000  | -4.184757000 | -2.969402000 | 1             | 5.638669000  | 1.929702000  | 1.590524000  |
| 1  | -1.540331000 | -4.844500000 | -2.332477000 | 6             | 4.928365000  | 1.070479000  | 3.404649000  |
| 1  | 3.390527000  | 0.425282000  | -4.319797000 | 1             | 5.455320000  | 1.861887000  | 3.968804000  |
| 1  | 2.833535000  | 3.031113000  | -3.922921000 | 1             | 4.983899000  | 0.151294000  | 4.011889000  |
| 1  | -1.030857000 | 5.638386000  | -1.160494000 | 8             | 2.908269000  | -1.153338000 | 5.344046000  |
| 1  | -3.360291000 | 4.885586000  | -0.032144000 | 1             | 2.202587000  | -0.578011000 | 4.998783000  |
| 1  | -6.278808000 | 0.444074000  | -0.056821000 | 1             | 3.383138000  | -1.481082000 | 4.560745000  |
| 1  | -5.956410000 | -2.065067000 | -0.992377000 | 6             | -0.226924000 | -0.020863000 | 0.016523000  |
| 1  | 1.869434000  | -2.926111000 | -5.296952000 | 8             | 0.249982000  | -1.143414000 | 0.216118000  |
| 1  | 3.902863000  | -4.281157000 | -5.759907000 | 8             | 0.331199000  | 0.949818000  | 0.842702000  |
| 1  | 5.815669000  | -4.231427000 | -4.143373000 | 8             | -1.114168000 | 3.014471000  | 1.710073000  |
| 1  | 5.672308000  | -2.811418000 | -2.109802000 | 1             | -1.915711000 | 2.478446000  | 1.867166000  |
| 1  | -0.284751000 | 5.721045000  | -3.743707000 | 1             | -0.202100000 | 1.778236000  | 0.868854000  |
| 1  | 1.042869000  | 7.818575000  | -3.854849000 | 1             | -1.408318000 | 3.695960000  | 1.081768000  |
| 1  | 3.245528000  | 7.968336000  | -2.690495000 |               |              |              |              |
| 1  | 4.106792000  | 6.000262000  | -1.418753000 |               |              |              |              |
| 1  | 2.775795000  | 3.904771000  | -1.311910000 |               |              |              |              |
|    |              |              |              | 5RC2 H3O+,K+: |              |              |              |
|    |              |              |              | 6             | 2.238327000  | 5.236764000  | -1.185494000 |

|    |              |              |              |    |              |              |              |
|----|--------------|--------------|--------------|----|--------------|--------------|--------------|
| 6  | 1.011810000  | 5.132687000  | -1.867794000 | 1  | 4.686495000  | -3.133477000 | -5.800242000 |
| 6  | 0.442264000  | 6.298137000  | -2.409741000 | 1  | 6.452156000  | -3.198534000 | -4.026721000 |
| 6  | 1.083551000  | 7.532471000  | -2.280850000 | 1  | 6.046237000  | -2.094180000 | -1.840459000 |
| 6  | 2.303367000  | 7.623101000  | -1.602869000 | 1  | -0.507610000 | 6.228791000  | -2.944211000 |
| 6  | 2.877613000  | 6.471437000  | -1.054479000 | 1  | 0.629832000  | 8.426686000  | -2.714784000 |
| 6  | 0.320993000  | 3.817549000  | -1.990126000 | 1  | 2.804201000  | 8.588628000  | -1.500316000 |
| 6  | 1.032554000  | 2.757281000  | -2.593285000 | 1  | 3.825991000  | 6.535068000  | -0.515637000 |
| 7  | 0.644113000  | 1.438154000  | -2.581469000 | 1  | 2.684317000  | 4.343024000  | -0.743216000 |
| 6  | 1.688294000  | 0.687673000  | -3.051455000 | 1  | -6.115979000 | 3.550697000  | -0.538604000 |
| 6  | 2.761507000  | 1.574877000  | -3.468469000 | 1  | -7.802231000 | 3.997937000  | 1.242698000  |
| 6  | 2.354531000  | 2.851362000  | -3.195847000 | 1  | -7.538583000 | 2.942545000  | 3.491960000  |
| 26 | -1.124046000 | 0.635432000  | -1.807656000 | 1  | -5.578566000 | 1.490196000  | 3.960311000  |
| 7  | -1.787857000 | 2.606181000  | -1.459880000 | 1  | -5.034842000 | -5.915130000 | -0.157621000 |
| 6  | -2.861886000 | 2.823607000  | -0.635927000 | 1  | -5.096867000 | -7.296384000 | -2.235477000 |
| 6  | -2.722654000 | 4.128864000  | -0.013183000 | 1  | -4.095102000 | -6.408505000 | -4.341291000 |
| 6  | -1.550718000 | 4.674296000  | -0.498425000 | 1  | -3.037214000 | -4.158478000 | -4.365290000 |
| 6  | -0.966072000 | 3.701743000  | -1.392877000 | 1  | 5.706093000  | 0.148116000  | -1.198559000 |
| 6  | -3.913374000 | 1.912578000  | -0.383469000 | 1  | 4.279874000  | 1.186266000  | -1.484597000 |
| 6  | -4.912339000 | 2.252047000  | 0.676563000  | 1  | -3.223653000 | -0.000302000 | 4.027750000  |
| 6  | -4.787120000 | 1.675497000  | 1.956737000  | 1  | -4.734508000 | -0.505891000 | 3.233327000  |
| 6  | -5.713407000 | 1.923200000  | 2.968434000  | 7  | -1.941373000 | -2.041097000 | 2.738990000  |
| 6  | -6.807946000 | 2.751099000  | 2.703506000  | 19 | 2.008161000  | -0.698508000 | 1.747979000  |
| 6  | -6.952097000 | 3.344190000  | 1.447183000  | 8  | 0.649705000  | -0.140408000 | 4.228277000  |
| 6  | -6.005915000 | 3.098130000  | 0.448903000  | 8  | 0.971330000  | -3.308675000 | 2.035786000  |
| 6  | 1.741924000  | -0.721712000 | -3.079403000 | 8  | 3.312507000  | 0.760765000  | 3.719170000  |
| 6  | 3.062006000  | -1.365202000 | -3.353644000 | 8  | 3.862897000  | -2.644304000 | 2.429372000  |
| 6  | 3.308696000  | -2.003090000 | -4.580827000 | 6  | -0.284342000 | -3.939548000 | 2.272220000  |
| 6  | 4.517615000  | -2.651289000 | -4.835159000 | 1  | -0.363656000 | -4.252159000 | 3.330231000  |
| 6  | 5.505543000  | -2.684517000 | -3.846331000 | 6  | -1.464185000 | -3.100832000 | 1.833030000  |
| 6  | 5.280369000  | -2.063440000 | -2.617478000 | 1  | -0.324630000 | -4.864269000 | 1.668708000  |
| 6  | 4.069997000  | -1.403051000 | -2.373343000 | 1  | -2.302837000 | -3.792235000 | 1.664923000  |
| 8  | 3.852298000  | -0.811200000 | -1.137842000 | 1  | -1.236066000 | -2.636246000 | 0.862582000  |
| 6  | 4.661130000  | 0.339782000  | -0.899038000 | 6  | 2.042622000  | -4.228059000 | 2.185798000  |
| 6  | 4.659824000  | 0.805247000  | 0.556721000  | 1  | 2.181057000  | -4.485230000 | 3.251551000  |
| 7  | 5.119543000  | -0.036691000 | 1.541314000  | 1  | 1.807499000  | -5.160542000 | 1.640058000  |
| 8  | -3.632549000 | 0.920461000  | 2.207229000  | 6  | 3.335213000  | -3.692733000 | 1.612994000  |
| 6  | -3.682345000 | -0.248668000 | 3.064982000  | 1  | 4.057115000  | -4.525655000 | 1.578597000  |
| 6  | -3.070408000 | -1.431934000 | 2.298668000  | 1  | 3.179432000  | -3.338587000 | 0.577328000  |
| 8  | -3.667036000 | -1.801994000 | 1.291881000  | 6  | 5.266780000  | -2.419676000 | 2.312714000  |
| 7  | -0.645605000 | -1.223934000 | -2.641376000 | 1  | 5.623892000  | -2.126292000 | 3.308336000  |
| 6  | 0.655063000  | 1.597802000  | -2.867214000 | 1  | 5.775193000  | -3.362703000 | 2.053736000  |
| 6  | 0.734872000  | -3.046762000 | -2.902279000 | 6  | 5.642765000  | -1.377093000 | 1.263257000  |
| 6  | -0.537203000 | -3.518290000 | -2.719746000 | 1  | 6.746280000  | -1.347062000 | 1.207977000  |
| 6  | -1.399676000 | -2.363038000 | -2.552307000 | 1  | 5.264353000  | -1.709140000 | 0.293327000  |
| 6  | -2.787995000 | -2.416401000 | -2.273058000 | 6  | -1.208730000 | -1.662045000 | 3.946199000  |
| 6  | -3.440112000 | -3.756967000 | -2.280293000 | 6  | -0.754384000 | -0.197157000 | 4.007254000  |
| 6  | -4.011167000 | -4.264252000 | -1.097935000 | 1  | -1.798251000 | -1.917576000 | 4.840409000  |
| 6  | -4.601480000 | -5.530296000 | -1.084207000 | 1  | -0.304121000 | -2.276686000 | 3.993721000  |
| 6  | -4.633867000 | -6.306734000 | -2.247709000 | 1  | -1.258433000 | 0.340927000  | 4.829103000  |
| 6  | -4.069672000 | -5.810114000 | -3.427334000 | 1  | -0.975828000 | 0.296369000  | 3.052442000  |
| 6  | -3.474633000 | -4.545896000 | -3.442517000 | 6  | 1.105431000  | 1.175832000  | 4.519425000  |
| 7  | -3.063595000 | -0.068996000 | -1.579667000 | 1  | 0.541916000  | 1.588851000  | 5.375289000  |
| 6  | -3.563002000 | -1.311648000 | -1.869059000 | 6  | 2.569163000  | 1.122870000  | 4.869185000  |
| 6  | -4.978157000 | -1.347347000 | -1.528199000 | 1  | 0.936680000  | 1.835404000  | 3.648025000  |
| 6  | -5.272670000 | -0.157934000 | -0.930659000 | 1  | 2.892468000  | 2.112844000  | 5.240935000  |
| 6  | -4.056044000 | 0.636275000  | -0.958650000 | 1  | 2.724825000  | 0.385282000  | 5.676522000  |
| 8  | 4.316396000  | 1.959114000  | 0.793088000  | 6  | 5.534581000  | 0.594179000  | 2.801330000  |
| 1  | -3.973110000 | -3.653797000 | -0.193090000 | 1  | 6.546947000  | 0.235049000  | 3.048212000  |
| 1  | 1.640895000  | -3.627997000 | -3.051553000 | 1  | 5.590141000  | 1.672447000  | 2.611697000  |
| 1  | -0.857043000 | -4.556175000 | -2.680360000 | 6  | 4.641798000  | 0.372816000  | 4.012330000  |
| 1  | 3.695093000  | 1.259191000  | -3.928720000 | 1  | 5.053896000  | 0.992123000  | 4.829491000  |
| 1  | 2.898506000  | 3.772796000  | -3.385549000 | 1  | 4.643103000  | -0.671930000 | 4.365761000  |
| 1  | -1.127086000 | 5.643458000  | -0.248323000 | 8  | 2.426812000  | -2.291158000 | 4.922525000  |
| 1  | -3.450492000 | 4.603966000  | 0.642863000  | 1  | 1.796926000  | -1.577669000 | 4.717920000  |
| 1  | -6.225919000 | 0.167768000  | -0.520883000 | 1  | 2.952764000  | -2.409530000 | 4.112289000  |
| 1  | -5.646103000 | -2.187898000 | -1.695858000 | 6  | -0.292107000 | 0.465393000  | 0.113767000  |
| 1  | 2.527269000  | -1.981531000 | -5.343316000 | 8  | -0.505234000 | -0.390683000 | 0.967200000  |



|   |              |              |             |   |              |              |              |
|---|--------------|--------------|-------------|---|--------------|--------------|--------------|
| 1 | 5.693736000  | 1.310021000  | 3.057056000 | 6 | -1.630046000 | -5.763047000 | -3.577325000 |
| 6 | 4.701095000  | -0.213411000 | 4.174675000 | 6 | -1.375075000 | -4.391852000 | -3.500770000 |
| 1 | 5.102398000  | 0.228529000  | 5.104463000 | 7 | -2.139490000 | -0.145523000 | -1.262645000 |
| 1 | 4.671610000  | -1.306100000 | 4.321130000 | 6 | -2.220993000 | -1.470578000 | -1.623764000 |
| 8 | 2.387532000  | -2.991941000 | 4.380389000 | 6 | -3.560860000 | -1.952294000 | -1.357527000 |
| 1 | 1.810039000  | -2.208842000 | 4.377997000 | 6 | -4.255191000 | -0.920173000 | -0.794002000 |
| 1 | 2.866202000  | -2.957299000 | 3.533453000 | 6 | -3.358231000 | 0.209631000  | -0.731833000 |
| 6 | -0.423548000 | 0.543518000  | 0.191466000 | 8 | 4.460488000  | 0.918244000  | 1.119831000  |
| 8 | -0.481329000 | -0.368536000 | 0.975375000 | 1 | -1.777589000 | -3.946464000 | -0.147966000 |
| 8 | 0.275938000  | 1.728096000  | 0.861387000 | 1 | 3.059245000  | -1.912175000 | -4.061689000 |
| 8 | -1.570936000 | 2.501873000  | 2.320502000 | 1 | 1.158065000  | -3.628718000 | -3.244048000 |
| 1 | -2.286033000 | 1.779964000  | 2.326576000 | 1 | 3.668408000  | 3.408454000  | -3.894830000 |
| 1 | 0.458031000  | 2.404871000  | 0.183739000 | 1 | 2.221949000  | 5.460094000  | -2.933558000 |
| 1 | -0.715833000 | 2.181633000  | 1.748785000 | 1 | -2.295507000 | 5.897986000  | -0.095030000 |
| 1 | -1.949850000 | 3.263963000  | 1.814572000 | 1 | -4.184408000 | 4.162722000  | 0.749431000  |

<sup>5</sup>IM2 H3O+,K+:

|    |              |              |              |    |              |              |              |
|----|--------------|--------------|--------------|----|--------------|--------------|--------------|
| 6  | 1.049045000  | 6.503914000  | -0.643644000 | 1  | 3.357896000  | 1.605760000  | -5.892552000 |
| 6  | 0.024516000  | 6.054500000  | -1.492427000 | 1  | 5.668124000  | 1.334452000  | -6.774470000 |
| 6  | -0.764140000 | 7.001641000  | -2.164041000 | 1  | 7.410926000  | 0.235764000  | -5.345639000 |
| 6  | -0.531488000 | 8.369236000  | -1.993487000 | 1  | 6.804314000  | -0.547672000 | -3.047884000 |
| 6  | 0.492011000  | 8.807270000  | -1.147295000 | 1  | -1.562216000 | 6.659828000  | -2.826903000 |
| 6  | 1.281645000  | 7.870823000  | -0.472108000 | 1  | -1.151002000 | 9.094903000  | -2.525828000 |
| 6  | -0.225611000 | 4.589510000  | -1.665211000 | 1  | 0.673766000  | 9.876254000  | -1.013743000 |
| 6  | 0.733757000  | 3.850928000  | -2.390671000 | 1  | 2.080597000  | 8.205550000  | 0.193785000  |
| 7  | 0.721573000  | 2.491655000  | -2.616311000 | 1  | 1.661462000  | 5.771057000  | -0.113451000 |
| 6  | 1.911959000  | 2.157990000  | -3.219496000 | 1  | -6.250445000 | 1.911418000  | -0.989344000 |
| 6  | 2.686536000  | 3.363261000  | -3.432344000 | 1  | -8.321160000 | 1.841152000  | 0.400750000  |
| 6  | 1.952178000  | 4.407629000  | -2.939662000 | 1  | -8.143488000 | 1.392448000  | 2.854139000  |
| 26 | -0.544188000 | 1.126025000  | -1.648250000 | 1  | -5.922256000 | 1.070155000  | 3.902235000  |
| 7  | -1.762720000 | 2.744134000  | -1.066259000 | 1  | -2.250549000 | -6.384785000 | -0.282781000 |
| 6  | -2.929778000 | 2.640563000  | -0.354198000 | 1  | -2.146306000 | -7.557805000 | -2.482458000 |
| 6  | -3.300188000 | 3.948197000  | 0.153377000  | 1  | -1.591743000 | -6.267274000 | -4.545774000 |
| 6  | -2.341164000 | 4.827124000  | -0.273971000 | 1  | -1.150227000 | -3.828311000 | -4.408343000 |
| 6  | -1.379024000 | 4.059687000  | -1.048968000 | 1  | 3.670091000  | 1.270683000  | -1.144197000 |
| 6  | -3.682194000 | 1.465982000  | -0.182133000 | 1  | 2.663876000  | -0.200854000 | -1.092419000 |
| 6  | -4.922352000 | 1.519385000  | 0.653551000  | 1  | -2.434678000 | 0.719385000  | 4.170092000  |
| 6  | -4.840237000 | 1.284031000  | 2.040430000  | 1  | -4.092548000 | 0.126676000  | 4.309846000  |
| 6  | -5.994321000 | 1.239089000  | 2.826960000  | 7  | -2.186967000 | -1.984485000 | 3.743231000  |
| 6  | -7.245260000 | 1.429676000  | 2.233791000  | 19 | 1.065890000  | -1.397924000 | 1.970758000  |
| 6  | -7.345044000 | 1.682918000  | 0.863646000  | 8  | 0.724605000  | -1.290139000 | 4.802731000  |
| 6  | -6.185067000 | 1.728795000  | 0.085485000  | 8  | -0.318718000 | -3.806488000 | 2.101700000  |
| 6  | 2.361782000  | 0.849272000  | -3.505266000 | 8  | 3.387688000  | -1.220628000 | 3.554190000  |
| 6  | 3.766244000  | 0.695070000  | -3.990044000 | 8  | 2.497663000  | -3.705297000 | 1.266930000  |
| 6  | 4.128088000  | 1.140685000  | -5.273432000 | 6  | -1.090726000 | -4.225402000 | 3.222521000  |
| 6  | 5.421438000  | 0.984317000  | -5.770150000 | 1  | -0.454771000 | -4.218304000 | 4.123171000  |
| 6  | 6.392440000  | 0.367936000  | -4.973483000 | 6  | -2.347757000 | -3.400826000 | 3.388975000  |
| 6  | 6.063125000  | -0.073332000 | -3.693717000 | 1  | -1.424850000 | -5.266945000 | 3.072747000  |
| 6  | 4.762202000  | 0.085489000  | -3.194434000 | 1  | -2.951728000 | -3.888352000 | 4.175325000  |
| 8  | 4.552561000  | -0.438336000 | -1.947668000 | 1  | -2.922910000 | -3.429695000 | 2.457552000  |
| 6  | 3.691254000  | 0.183812000  | -1.002545000 | 6  | 0.417411000  | -4.880629000 | 1.529559000  |
| 6  | 4.226820000  | -0.051255000 | 0.406845000  | 1  | 0.929767000  | -5.454998000 | 2.319732000  |
| 7  | 4.417549000  | -1.344218000 | 0.827819000  | 1  | -0.266014000 | -5.564589000 | 0.998863000  |
| 8  | -3.577611000 | 1.200893000  | 2.584849000  | 6  | 1.445815000  | -4.364449000 | 0.554922000  |
| 6  | -3.257362000 | 0.273795000  | 3.605420000  | 1  | 1.852531000  | -5.225731000 | 0.000821000  |
| 6  | -2.910969000 | -1.091275000 | 2.997853000  | 1  | 0.986523000  | -3.680611000 | -0.181617000 |
| 8  | -3.358351000 | -1.365257000 | 1.893117000  | 6  | 3.789770000  | -3.775642000 | 0.665312000  |
| 7  | 0.399881000  | -0.418801000 | -2.694301000 | 1  | 4.505940000  | -4.050260000 | 1.451655000  |
| 6  | 1.636497000  | -0.336965000 | -3.278357000 | 1  | 3.808470000  | -4.589513000 | -0.076273000 |
| 6  | 2.110847000  | -1.673307000 | -3.587945000 | 6  | 4.216552000  | -2.501681000 | -0.049659000 |
| 6  | 1.140965000  | -2.544609000 | -3.178465000 | 1  | 5.152244000  | -2.731058000 | -0.589630000 |
| 6  | 0.053098000  | -1.746126000 | -2.637241000 | 1  | 3.466047000  | -2.255864000 | -0.809739000 |
| 6  | -1.177752000 | -2.253290000 | -2.168373000 | 6  | -1.696844000 | -1.679654000 | 5.090351000  |
| 6  | -1.425790000 | -3.720275000 | -2.266785000 | 6  | -0.518430000 | -0.723702000 | 5.208332000  |
| 6  | -1.745070000 | -4.457241000 | -1.112101000 | 1  | -2.509364000 | -1.267198000 | 5.711818000  |
| 6  | -2.003054000 | -5.827647000 | -1.189585000 | 1  | -1.413778000 | -2.629956000 | 5.562479000  |
| 6  | -1.944222000 | -6.485961000 | -2.422014000 | 1  | -0.447951000 | -0.437455000 | 6.272943000  |



|                                   |              |              |              |    |              |              |              |
|-----------------------------------|--------------|--------------|--------------|----|--------------|--------------|--------------|
| 1                                 | 3.218712000  | -5.408060000 | 2.705374000  | 6  | -3.456612000 | 5.634254000  | 0.200699000  |
| 6                                 | 4.169660000  | -3.869844000 | 1.567548000  | 6  | 0.510577000  | -2.311308000 | -2.542666000 |
| 1                                 | 5.114759000  | -4.428290000 | 1.702444000  | 6  | 1.292769000  | -3.573600000 | -2.622680000 |
| 1                                 | 3.743980000  | -4.173632000 | 0.609362000  | 6  | 0.914515000  | -4.582970000 | -3.532225000 |
| 6                                 | -1.770144000 | -0.557748000 | 3.716557000  | 6  | 1.599300000  | -5.793279000 | -3.632792000 |
| 6                                 | -0.827316000 | 0.594367000  | 3.352906000  | 6  | 2.704454000  | -6.029934000 | -2.810918000 |
| 1                                 | -2.119316000 | -0.452068000 | 4.756564000  | 6  | 3.108028000  | -5.049739000 | -1.903206000 |
| 1                                 | -1.169495000 | -1.471978000 | 3.691765000  | 6  | 2.417831000  | -3.833965000 | -1.811072000 |
| 1                                 | -1.049613000 | 1.504259000  | 3.937410000  | 8  | 2.811253000  | -2.901503000 | -0.861455000 |
| 1                                 | -0.912924000 | 0.830793000  | 2.287126000  | 6  | 4.147420000  | -2.424270000 | -0.982174000 |
| 6                                 | 1.463921000  | 1.214279000  | 3.514751000  | 6  | 4.754743000  | -1.880940000 | 0.308169000  |
| 1                                 | 1.183479000  | 2.078917000  | 4.145392000  | 7  | 4.470830000  | -2.476033000 | 1.519777000  |
| 6                                 | 2.812588000  | 0.710774000  | 3.966421000  | 8  | -3.131088000 | 2.463284000  | 1.968390000  |
| 1                                 | 1.490481000  | 1.551019000  | 2.467703000  | 6  | -3.659453000 | 1.778360000  | 3.098406000  |
| 1                                 | 3.531875000  | 1.549833000  | 3.953014000  | 6  | -3.859014000 | 0.326273000  | 2.645701000  |
| 1                                 | 2.726380000  | 0.341259000  | 5.003607000  | 8  | -4.900018000 | 0.064084000  | 2.043861000  |
| 6                                 | 5.096387000  | -1.870052000 | 2.730829000  | 7  | -1.771350000 | -1.381608000 | -2.266284000 |
| 1                                 | 5.683322000  | -2.653301000 | 3.239090000  | 6  | -0.860202000 | -2.414097000 | -2.248076000 |
| 1                                 | 5.798313000  | -1.100641000 | 2.391614000  | 6  | -1.547263000 | -3.645663000 | -1.883998000 |
| 6                                 | 4.138560000  | -1.252726000 | 3.743966000  | 6  | -2.868690000 | -3.336819000 | -1.723639000 |
| 1                                 | 4.763779000  | -0.742252000 | 4.498118000  | 6  | -3.006310000 | -1.907589000 | -1.939523000 |
| 1                                 | 3.530984000  | -2.003175000 | 4.276825000  | 6  | -4.186754000 | -1.185353000 | -1.708340000 |
| 8                                 | 1.026920000  | -2.347149000 | 4.835149000  | 6  | -5.440885000 | -1.969229000 | -1.521982000 |
| 1                                 | 0.877088000  | -1.451990000 | 4.477818000  | 6  | -6.156008000 | -1.909277000 | -0.309781000 |
| 1                                 | 1.240920000  | -2.888427000 | 4.054721000  | 6  | -7.310554000 | -2.674717000 | -0.127918000 |
| 6                                 | -0.401316000 | 0.402735000  | -0.136546000 | 6  | -7.777414000 | -3.510805000 | -1.149457000 |
| 8                                 | -0.974045000 | -0.520445000 | 0.466382000  | 6  | -7.075982000 | -3.577920000 | -3.357093000 |
| 8                                 | 0.579319000  | 1.072459000  | 0.285780000  | 6  | -5.918838000 | -2.814546000 | -2.539465000 |
| 6                                 | 3.566760000  | 2.154623000  | 0.670177000  | 7  | -3.133883000 | 1.039487000  | -1.406240000 |
| 6                                 | 4.890623000  | 2.093140000  | 1.137915000  | 6  | -4.245168000 | 0.223859000  | -1.508826000 |
| 6                                 | 5.393897000  | 3.116640000  | 1.942848000  | 6  | -5.415778000 | 0.989982000  | -1.194393000 |
| 6                                 | 4.597264000  | 4.215089000  | 2.291908000  | 6  | -4.983748000 | 2.252276000  | -0.822079000 |
| 6                                 | 3.284029000  | 4.278022000  | 1.812765000  | 6  | -3.558469000 | 2.255587000  | -0.952519000 |
| 6                                 | 2.766899000  | 3.262186000  | 1.005231000  | 8  | 5.499811000  | -0.915841000 | 0.198126000  |
| 1                                 | 5.489529000  | 1.222027000  | 0.871922000  | 1  | -5.783057000 | -1.268666000 | 0.491753000  |
| 1                                 | 6.423340000  | 3.053073000  | 2.306811000  | 1  | -1.078373000 | -4.618322000 | -1.757157000 |
| 1                                 | 4.996555000  | 5.011580000  | 2.924081000  | 1  | -3.673584000 | -4.009552000 | -1.437008000 |
| 1                                 | 2.648484000  | 5.131276000  | 2.066387000  | 1  | 3.037220000  | -1.818209000 | -3.905112000 |
| 1                                 | 1.747549000  | 3.312864000  | 0.623171000  | 1  | 3.593954000  | 0.823617000  | -4.131448000 |
| 8                                 | 3.102535000  | 1.147264000  | -0.098509000 | 1  | 1.475744000  | 5.120768000  | -1.629499000 |
| 1                                 | 2.105416000  | 1.206471000  | -0.169688000 | 1  | -0.803315000 | 5.534956000  | -0.277730000 |
|                                   |              |              |              | 1  | -5.588090000 | 3.096238000  | -0.493865000 |
|                                   |              |              |              | 1  | -6.438192000 | 0.620812000  | -1.214625000 |
|                                   |              |              |              | 1  | 0.057907000  | -4.389745000 | -4.180583000 |
|                                   |              |              |              | 1  | 1.275621000  | -6.546069000 | -4.355112000 |
|                                   |              |              |              | 1  | 3.252697000  | -6.972735000 | -2.869660000 |
|                                   |              |              |              | 1  | 3.966452000  | -5.238248000 | -1.256069000 |
|                                   |              |              |              | 1  | 1.807388000  | 4.710869000  | -4.381121000 |
|                                   |              |              |              | 1  | 3.837131000  | 6.079759000  | -4.807908000 |
|                                   |              |              |              | 1  | 6.017582000  | 5.442469000  | -3.770317000 |
|                                   |              |              |              | 1  | 6.137709000  | 3.423560000  | -2.300559000 |
|                                   |              |              |              | 1  | 4.097697000  | 2.066521000  | -1.882157000 |
|                                   |              |              |              | 1  | -3.299384000 | 6.021529000  | -0.808485000 |
|                                   |              |              |              | 1  | -4.114704000 | 7.538814000  | 0.992627000  |
|                                   |              |              |              | 1  | -4.492198000 | 6.627177000  | 3.292837000  |
|                                   |              |              |              | 1  | -4.032732000 | 4.244616000  | 3.773506000  |
|                                   |              |              |              | 1  | -7.847170000 | -2.624823000 | 0.823509000  |
|                                   |              |              |              | 1  | -8.681465000 | -4.107506000 | -1.003962000 |
|                                   |              |              |              | 1  | -7.432121000 | -4.225009000 | -3.162944000 |
|                                   |              |              |              | 1  | -5.373417000 | -2.867573000 | -3.484478000 |
|                                   |              |              |              | 1  | 4.816193000  | -3.213768000 | -1.363886000 |
|                                   |              |              |              | 1  | 4.170182000  | -1.588825000 | -1.695672000 |
|                                   |              |              |              | 1  | -3.007160000 | 1.905884000  | 3.975497000  |
|                                   |              |              |              | 1  | -4.660525000 | 2.157553000  | 3.348599000  |
|                                   |              |              |              | 7  | -2.878034000 | -0.594460000 | 2.839367000  |
|                                   |              |              |              | 19 | 1.469461000  | -1.260462000 | 1.284134000  |
|                                   |              |              |              | 8  | 0.548065000  | 0.245588000  | 3.605892000  |
| <b><sup>5</sup>RC1 phenol.K+:</b> |              |              |              |    |              |              |              |
| 6                                 | 4.050134000  | 2.937767000  | -2.533917000 |    |              |              |              |
| 6                                 | 2.810131000  | 3.287795000  | -3.103617000 |    |              |              |              |
| 6                                 | 2.759123000  | 4.429502000  | -3.924841000 |    |              |              |              |
| 6                                 | 3.901754000  | 5.198876000  | -4.163837000 |    |              |              |              |
| 6                                 | 5.123839000  | 4.841074000  | -3.586278000 |    |              |              |              |
| 6                                 | 5.191191000  | 3.706058000  | -2.769015000 |    |              |              |              |
| 6                                 | 1.582042000  | 2.494408000  | -2.817671000 |    |              |              |              |
| 6                                 | 1.642581000  | 1.082455000  | -3.046413000 |    |              |              |              |
| 7                                 | 0.701968000  | 0.170997000  | -2.607644000 |    |              |              |              |
| 6                                 | 1.183812000  | -1.089577000 | -2.867531000 |    |              |              |              |
| 6                                 | 2.444372000  | -0.982653000 | -3.538158000 |    |              |              |              |
| 6                                 | 2.723655000  | 0.372099000  | -3.661856000 |    |              |              |              |
| 26                                | -1.162373000 | 0.600129000  | -1.838849000 |    |              |              |              |
| 7                                 | -0.759596000 | 2.655653000  | -1.993223000 |    |              |              |              |
| 6                                 | -1.419057000 | 3.539058000  | -1.157787000 |    |              |              |              |
| 6                                 | -0.555070000 | 4.683569000  | -0.906974000 |    |              |              |              |
| 6                                 | 0.600563000  | 4.476815000  | -1.602010000 |    |              |              |              |
| 6                                 | 0.497869000  | 3.170223000  | -2.237166000 |    |              |              |              |
| 6                                 | -2.698005000 | 3.354501000  | -0.622439000 |    |              |              |              |
| 6                                 | -3.200333000 | 4.275972000  | 0.433286000  |    |              |              |              |
| 6                                 | -3.425594000 | 3.777077000  | 1.748533000  |    |              |              |              |
| 6                                 | -3.885471000 | 4.625679000  | 2.762384000  |    |              |              |              |
| 6                                 | -4.134145000 | 5.977068000  | 2.490857000  |    |              |              |              |
| 6                                 | -3.919098000 | 6.486464000  | 1.210513000  |    |              |              |              |

|                              |              |              |              |    |              |              |              |
|------------------------------|--------------|--------------|--------------|----|--------------|--------------|--------------|
| 8                            | -0.984501000 | -3.134224000 | 2.152495000  | 6  | 4.003592000  | 2.319753000  | -0.261689000 |
| 8                            | 3.309610000  | -0.317443000 | 3.125669000  | 7  | 2.792756000  | 2.503835000  | 0.384596000  |
| 8                            | 1.849202000  | -3.725888000 | 2.483907000  | 6  | 2.187379000  | 3.596246000  | -0.225202000 |
| 6                            | -2.327886000 | -3.086545000 | 2.615435000  | 6  | 3.044828000  | 4.105703000  | -1.277334000 |
| 1                            | -2.356650000 | -3.179615000 | 3.718585000  | 6  | 4.180845000  | 3.355950000  | -1.263990000 |
| 6                            | -3.088079000 | -1.870194000 | 2.130151000  | 26 | 1.881461000  | 1.205293000  | 1.595826000  |
| 1                            | -2.867737000 | -3.962537000 | 2.210420000  | 7  | 3.391038000  | -0.076341000 | 1.392022000  |
| 1                            | -4.156642000 | -2.109535000 | 2.212777000  | 6  | 3.423533000  | -1.393923000 | 1.823269000  |
| 1                            | -2.868228000 | -1.720455000 | 1.063015000  | 6  | 4.653425000  | -2.006730000 | 1.452777000  |
| 6                            | -0.443656000 | -4.434501000 | 2.255111000  | 6  | 5.389661000  | -1.047527000 | 0.781319000  |
| 1                            | -0.413306000 | -4.766081000 | 3.311232000  | 6  | 4.582416000  | 0.131039000  | 0.720032000  |
| 1                            | -1.074375000 | -5.153638000 | 1.696524000  | 6  | 2.400001000  | -2.026706000 | 2.563517000  |
| 6                            | 0.948872000  | -4.484079000 | 1.672960000  | 6  | 2.415591000  | -3.514632000 | 2.682059000  |
| 1                            | 1.275273000  | -5.535812000 | 1.636500000  | 6  | 1.749528000  | -4.282277000 | 1.697652000  |
| 1                            | 0.948558000  | -4.098947000 | 0.638335000  | 6  | 1.687883000  | -5.676606000 | 1.810614000  |
| 6                            | 3.144236000  | -4.277917000 | 2.685963000  | 6  | 2.308134000  | -6.315592000 | 2.890017000  |
| 1                            | 3.479439000  | -3.937406000 | 3.674187000  | 6  | 2.984574000  | -5.574988000 | 3.860432000  |
| 1                            | 3.080412000  | -5.378180000 | 2.728585000  | 6  | 3.027898000  | -4.179958000 | 3.748280000  |
| 6                            | 4.148779000  | -3.906001000 | 1.604996000  | 6  | 0.982523000  | 4.163342000  | 0.149307000  |
| 1                            | 5.076815000  | -4.469990000 | 1.812438000  | 6  | 0.361400000  | 5.224155000  | -0.693564000 |
| 1                            | 3.767131000  | -4.247335000 | 0.641317000  | 6  | 0.865743000  | 6.529251000  | -0.783411000 |
| 6                            | -1.746688000 | -0.413359000 | 3.748091000  | 6  | 0.232385000  | 7.501365000  | -1.565288000 |
| 6                            | -0.780733000 | 0.735118000  | 3.432333000  | 6  | -0.924782000 | 7.174210000  | -2.277530000 |
| 1                            | -2.111416000 | -0.325280000 | 4.784716000  | 6  | -1.443618000 | 5.877075000  | -2.214828000 |
| 1                            | -1.152648000 | -1.331083000 | 3.712168000  | 6  | -0.804961000 | 4.915551000  | -1.426574000 |
| 1                            | -0.927673000 | 1.584199000  | 4.122949000  | 8  | -1.251810000 | 3.623551000  | -1.362151000 |
| 1                            | -0.916553000 | 1.096851000  | 2.406689000  | 6  | -2.618467000 | 3.356797000  | -1.098709000 |
| 6                            | 1.541741000  | 1.262320000  | 3.564095000  | 6  | -3.283925000 | 2.767294000  | -2.340073000 |
| 1                            | 1.268505000  | 2.087770000  | 4.247348000  | 7  | -4.426828000 | 2.029019000  | -2.153912000 |
| 6                            | 2.861912000  | 0.690062000  | 4.019672000  | 8  | 1.221428000  | -3.578672000 | 0.658983000  |
| 1                            | 1.607812000  | 1.673814000  | 2.546662000  | 6  | 0.352180000  | -4.173347000 | -0.272096000 |
| 1                            | 3.606674000  | 1.505349000  | 4.073234000  | 6  | -1.061542000 | -4.291763000 | 0.300982000  |
| 1                            | 2.735922000  | 0.268510000  | 5.032702000  | 8  | -1.262557000 | -4.024989000 | 1.488326000  |
| 6                            | 5.113097000  | -1.884124000 | 2.699967000  | 7  | 0.563894000  | 2.644317000  | 2.076234000  |
| 1                            | 5.714116000  | -2.657040000 | 3.207559000  | 6  | 0.282143000  | 3.768343000  | 1.320531000  |
| 1                            | 5.802003000  | -1.115250000 | 2.333595000  | 6  | -0.788391000 | 4.498492000  | 1.902452000  |
| 6                            | 4.181469000  | -1.257556000 | 3.730581000  | 6  | -1.175675000 | 3.801225000  | 3.041272000  |
| 1                            | 4.830121000  | -0.759536000 | 4.473574000  | 6  | -0.346780000 | 2.637360000  | 3.114403000  |
| 1                            | 3.573899000  | -2.000468000 | 4.273425000  | 6  | -0.580339000 | 1.544799000  | 3.996090000  |
| 8                            | 1.035826000  | -2.277548000 | 4.805655000  | 6  | -1.716983000 | 1.671063000  | 4.953899000  |
| 1                            | 0.887172000  | -1.379735000 | 4.455225000  | 6  | -2.892762000 | 0.922162000  | 4.763164000  |
| 1                            | 1.210295000  | -2.815734000 | 4.013139000  | 6  | -3.970382000 | 1.050642000  | 5.643582000  |
| 6                            | -0.498042000 | 0.523001000  | 0.004690000  | 6  | -3.897283000 | 1.936766000  | 6.723959000  |
| 8                            | -0.970026000 | -0.486662000 | 0.534285000  | 6  | -2.736469000 | 2.692991000  | 6.918398000  |
| 8                            | 0.333061000  | 1.351883000  | 0.429673000  | 6  | -1.657426000 | 2.560789000  | 6.039452000  |
| 6                            | 3.481326000  | 2.207524000  | 0.731417000  | 7  | 1.129127000  | 0.036294000  | 3.036186000  |
| 6                            | 4.809893000  | 2.079953000  | 1.165582000  | 6  | 0.074972000  | 0.326220000  | 3.883682000  |
| 6                            | 5.426260000  | 3.142017000  | 1.829871000  | 6  | -0.299098000 | -0.871682000 | 4.617784000  |
| 6                            | 4.736934000  | 4.337949000  | 2.069821000  | 6  | 0.466829000  | -1.891263000 | 4.144361000  |
| 6                            | 3.414917000  | 4.459377000  | 1.628294000  | 6  | 1.379167000  | -1.320894000 | 3.175175000  |
| 6                            | 2.784579000  | 3.405523000  | 0.961832000  | 8  | -2.782672000 | 2.964641000  | -3.443157000 |
| 1                            | 5.328254000  | 1.140726000  | 0.973058000  | 1  | -2.949012000 | 0.247934000  | 3.907147000  |
| 1                            | 6.460911000  | 3.032857000  | 2.166736000  | 1  | -1.192939000 | 5.431975000  | 1.518073000  |
| 1                            | 5.225597000  | 5.164332000  | 2.590961000  | 1  | -1.959140000 | 4.061782000  | 3.748303000  |
| 1                            | 2.862234000  | 5.387114000  | 1.800475000  | 1  | 2.812584000  | 4.955511000  | -1.914277000 |
| 1                            | 1.758187000  | 3.498799000  | 0.605940000  | 1  | 5.058692000  | 3.468315000  | -1.894563000 |
| 8                            | 2.902806000  | 1.163691000  | 0.092652000  | 1  | 6.371374000  | -1.156542000 | 0.328340000  |
| 1                            | 1.933988000  | 1.344819000  | -0.025383000 | 1  | 4.927996000  | -3.035729000 | 1.672090000  |
|                              |              |              |              | 1  | 0.453467000  | -2.937291000 | 4.440226000  |
|                              |              |              |              | 1  | -1.070836000 | -0.918490000 | 5.380897000  |
|                              |              |              |              | 1  | 1.762226000  | 6.783752000  | -0.213580000 |
|                              |              |              |              | 1  | 0.640773000  | 8.513292000  | -1.613870000 |
|                              |              |              |              | 1  | -1.422619000 | 7.925540000  | -1.895195000 |
|                              |              |              |              | 1  | -2.322650000 | 5.591779000  | -2.794852000 |
|                              |              |              |              | 1  | 7.405968000  | 1.551995000  | 0.940932000  |
|                              |              |              |              | 1  | 9.562108000  | 1.481095000  | -0.298060000 |
|                              |              |              |              | 1  | 9.572400000  | 1.132507000  | -2.769973000 |
| <b>3RC1 phenol, 6W, K+:-</b> |              |              |              |    |              |              |              |
| 6                            | 6.203928000  | 1.054753000  | -2.205627000 |    |              |              |              |
| 6                            | 6.184281000  | 1.254307000  | -0.814161000 |    |              |              |              |
| 6                            | 7.408721000  | 1.402331000  | -0.141477000 |    |              |              |              |
| 6                            | 8.619776000  | 1.359884000  | -0.838513000 |    |              |              |              |
| 6                            | 8.626271000  | 1.166414000  | -2.224094000 |    |              |              |              |
| 6                            | 7.413638000  | 1.014180000  | -2.904562000 |    |              |              |              |
| 6                            | 4.893589000  | 1.272229000  | -0.062919000 |    |              |              |              |







|    |              |              |              |    |              |              |              |
|----|--------------|--------------|--------------|----|--------------|--------------|--------------|
| 6  | 2.870883000  | 0.718675000  | -3.226736000 | 1  | -5.807343000 | 5.701315000  | 2.629449000  |
| 6  | 2.695004000  | 2.090518000  | -3.139263000 | 1  | -6.065082000 | 4.125807000  | 4.557106000  |
| 26 | -1.077737000 | 0.793326000  | -1.658155000 | 1  | -5.031050000 | 1.876123000  | 4.464231000  |
| 7  | -1.240118000 | 2.725781000  | -1.195890000 | 1  | -6.661011000 | -4.672346000 | -0.731624000 |
| 6  | -2.121904000 | 3.238505000  | -0.260984000 | 1  | -6.999107000 | -5.637005000 | -3.008937000 |
| 6  | -1.728729000 | 4.592481000  | 0.078378000  | 1  | -5.689696000 | -4.739042000 | -4.935956000 |
| 6  | -0.656918000 | 4.906160000  | -0.702750000 | 1  | -4.061921000 | -2.891621000 | -4.580634000 |
| 6  | -0.307346000 | 3.717617000  | -1.454964000 | 1  | 5.691357000  | -1.347769000 | -1.223088000 |
| 6  | -3.259102000 | 2.575700000  | 0.202046000  | 1  | 4.612865000  | 0.064428000  | -1.357857000 |
| 6  | -4.027956000 | 3.041204000  | 1.382751000  | 1  | -3.586907000 | -0.150600000 | 4.180763000  |
| 6  | -4.197527000 | 2.158394000  | 2.487981000  | 1  | -5.144011000 | -0.110735000 | 3.301031000  |
| 6  | -4.925060000 | 2.553222000  | 3.615752000  | 7  | -2.540683000 | -2.004771000 | 2.450915000  |
| 6  | -5.500554000 | 3.828832000  | 3.670009000  | 19 | 1.769366000  | -1.198782000 | 1.354973000  |
| 6  | -5.351071000 | 4.709310000  | 2.598485000  | 8  | 0.420352000  | -0.379947000 | 3.774413000  |
| 6  | -4.624361000 | 4.308356000  | 1.471612000  | 8  | 0.108352000  | -3.697511000 | 1.575906000  |
| 6  | 1.408120000  | -1.282104000 | -2.720494000 | 8  | 3.243183000  | 0.029337000  | 3.500839000  |
| 6  | 2.519245000  | -2.234048000 | -2.991252000 | 8  | 2.978192000  | -3.564808000 | 2.202120000  |
| 6  | 2.510196000  | -3.008252000 | -4.169819000 | 6  | -1.242059000 | -4.100210000 | 1.789886000  |
| 6  | 3.501727000  | -3.946566000 | -4.453381000 | 1  | -1.373657000 | -4.454912000 | 2.830472000  |
| 6  | 4.548102000  | -4.139894000 | -3.546971000 | 6  | -2.249142000 | -3.027554000 | 1.430318000  |
| 6  | 4.590452000  | -3.382844000 | -2.376091000 | 1  | -1.451470000 | -4.962990000 | 1.131029000  |
| 6  | 3.595555000  | -2.434422000 | -2.104166000 | 1  | -3.199002000 | -3.533533000 | 1.217828000  |
| 8  | 3.658046000  | -1.718082000 | -0.915816000 | 1  | -1.922033000 | -2.525418000 | 0.508143000  |
| 6  | 4.794108000  | -0.864672000 | -0.800008000 | 6  | 0.988238000  | -4.803161000 | 1.626594000  |
| 6  | 5.118703000  | -0.439254000 | 0.627920000  | 1  | 1.009736000  | -5.238496000 | 2.644041000  |
| 7  | 5.043539000  | -1.352552000 | 1.657171000  | 1  | 0.641532000  | -5.592760000 | 0.932370000  |
| 8  | -3.589723000 | 0.940137000  | 2.399920000  | 6  | 2.387985000  | -4.412513000 | 1.215361000  |
| 6  | -4.052101000 | -0.154433000 | 3.181996000  | 1  | 2.985379000  | -5.333532000 | 1.115416000  |
| 6  | -3.759965000 | -1.411154000 | 2.352657000  | 1  | 2.376676000  | -3.912141000 | 0.230176000  |
| 8  | -4.627521000 | -1.797946000 | 1.570990000  | 6  | 4.387688000  | -3.680812000 | 2.361960000  |
| 7  | -1.036082000 | -1.044544000 | -2.467647000 | 1  | 4.604861000  | -3.449267000 | 3.412870000  |
| 6  | 0.113590000  | -1.794574000 | -2.617973000 | 1  | 4.696012000  | -4.725819000 | 2.191537000  |
| 6  | -0.230142000 | -3.201532000 | -2.705881000 | 6  | 5.194285000  | -2.793358000 | 1.423732000  |
| 6  | -1.592546000 | -3.281996000 | -2.664542000 | 1  | 6.257842000  | -3.069772000 | 1.546303000  |
| 6  | -2.096370000 | -1.937394000 | -2.491930000 | 1  | 4.910235000  | -3.022985000 | 0.394773000  |
| 6  | -3.438493000 | -1.641309000 | -2.252147000 | 6  | -1.560799000 | -1.674531000 | 3.483131000  |
| 6  | -4.441421000 | -2.724384000 | -2.461874000 | 6  | -0.957769000 | -0.266778000 | 3.423335000  |
| 6  | -5.186498000 | -3.237207000 | -1.382446000 | 1  | -1.989260000 | -1.863740000 | 4.480432000  |
| 6  | -6.097303000 | -4.278085000 | -1.581477000 | 1  | -0.728740000 | -2.377203000 | 3.376780000  |
| 6  | -6.285113000 | -4.823608000 | -2.857079000 | 1  | -1.448641000 | 0.416902000  | 4.136936000  |
| 6  | -5.550103000 | -4.321817000 | -3.935334000 | 1  | -1.055323000 | 0.148878000  | 2.415155000  |
| 6  | -4.636029000 | -3.282403000 | -3.737350000 | 6  | 1.049791000  | 0.864619000  | 4.045273000  |
| 7  | -3.001053000 | 0.576882000  | -1.243073000 | 1  | 0.497218000  | 1.402570000  | 4.838190000  |
| 6  | -3.864292000 | -0.419774000 | -1.684226000 | 6  | 2.451621000  | 0.601334000  | 4.533567000  |
| 6  | -5.196775000 | -0.120393000 | -1.259494000 | 1  | 1.045891000  | 1.493953000  | 3.141530000  |
| 6  | -5.120845000 | 1.011411000  | -0.471042000 | 1  | 2.904498000  | 1.548782000  | 4.879772000  |
| 6  | -3.751708000 | 1.419698000  | -0.469422000 | 1  | 2.401847000  | -0.086372000 | 5.395988000  |
| 8  | 5.458359000  | 0.724192000  | 0.799465000  | 6  | 5.438546000  | -0.861003000 | 2.981804000  |
| 1  | -5.032510000 | -2.818227000 | -0.385581000 | 1  | 6.217460000  | -1.523135000 | 3.393981000  |
| 1  | 0.479805000  | -4.019539000 | -2.793797000 | 1  | 5.883710000  | 0.129157000  | 2.833465000  |
| 1  | -2.206902000 | -4.178006000 | -2.705900000 | 6  | 4.320163000  | -0.745754000 | 4.006902000  |
| 1  | 3.722530000  | 0.179381000  | -3.635862000 | 1  | 4.757542000  | -0.260522000 | 4.898131000  |
| 1  | 3.392279000  | 2.866293000  | -3.443229000 | 1  | 3.925955000  | -1.724444000 | 4.327646000  |
| 1  | -0.096622000 | 5.837388000  | -0.714327000 | 8  | 1.581621000  | -2.848570000 | 4.599591000  |
| 1  | -2.220786000 | 5.225563000  | 0.811570000  | 1  | 1.183486000  | -1.988213000 | 4.372066000  |
| 1  | -5.926963000 | 1.523659000  | 0.050207000  | 1  | 2.009470000  | -3.147712000 | 3.777767000  |
| 1  | -6.077799000 | -0.715212000 | -1.485042000 | 6  | -0.312400000 | 0.375135000  | 0.032556000  |
| 1  | 1.693044000  | -2.852494000 | -4.876652000 | 8  | -0.637143000 | -0.780874000 | 0.353410000  |
| 1  | 3.459429000  | -4.523225000 | -5.380107000 | 8  | 0.465580000  | 1.120351000  | 0.693215000  |
| 1  | 5.329778000  | -4.876405000 | -3.745489000 | 6  | 3.108860000  | 2.678492000  | 0.895219000  |
| 1  | 5.403879000  | -3.533269000 | -1.663921000 | 1  | 3.245571000  | 1.896126000  | 1.657620000  |
| 1  | 0.131285000  | 5.722953000  | -3.608335000 | 1  | 4.094095000  | 3.090870000  | 0.653977000  |
| 1  | 1.406462000  | 7.811193000  | -4.042988000 | 1  | 2.661724000  | 2.198739000  | 0.014241000  |
| 1  | 3.706537000  | 8.089428000  | -3.108926000 | 6  | 2.210000000  | 3.759201000  | 1.445902000  |
| 1  | 4.705574000  | 6.258142000  | -1.734293000 | 8  | 2.617638000  | 4.851011000  | 1.800533000  |
| 1  | 3.422071000  | 4.182863000  | -1.305242000 | 8  | 0.928821000  | 3.441633000  | 1.576065000  |
| 1  | -4.535774000 | 4.983449000  | 0.618370000  | 1  | 0.699640000  | 2.559549000  | 1.126498000  |

| <sup>5</sup> RC1 acetate, K <sup>+</sup> : |              |              |              |
|--------------------------------------------|--------------|--------------|--------------|
| 6                                          | 2.245254000  | 5.356614000  | -1.794180000 |
| 6                                          | 0.970099000  | 5.056483000  | -2.310380000 |
| 6                                          | 0.293500000  | 6.072604000  | -3.013737000 |
| 6                                          | 0.861162000  | 7.337609000  | -3.186160000 |
| 6                                          | 2.125994000  | 7.618824000  | -2.660102000 |
| 6                                          | 2.814569000  | 6.620022000  | -1.962593000 |
| 6                                          | 0.326869000  | 3.727221000  | -2.111318000 |
| 6                                          | 1.077757000  | 2.560341000  | -2.468625000 |
| 7                                          | 0.675028000  | 1.263020000  | -2.219167000 |
| 6                                          | 1.685850000  | 0.420417000  | -2.615467000 |
| 6                                          | 2.770727000  | 1.201592000  | -3.134433000 |
| 6                                          | 2.380979000  | 2.532556000  | -3.065201000 |
| 26                                         | -1.137694000 | 0.644162000  | -1.425079000 |
| 7                                          | -1.805337000 | 2.646665000  | -1.386343000 |
| 6                                          | -2.777505000 | 2.995956000  | -0.461897000 |
| 6                                          | -2.548311000 | 4.368111000  | -0.035387000 |
| 6                                          | -1.456796000 | 4.825578000  | -0.711863000 |
| 6                                          | -0.944143000 | 3.720066000  | -1.510675000 |
| 6                                          | -3.789046000 | 2.150619000  | 0.004884000  |
| 6                                          | -4.642160000 | 2.523241000  | 1.161278000  |
| 6                                          | -4.652771000 | 1.684261000  | 2.315126000  |
| 6                                          | -5.457003000 | 1.994080000  | 3.417067000  |
| 6                                          | -6.264295000 | 3.138450000  | 3.401202000  |
| 6                                          | -6.265365000 | 3.977404000  | 2.286359000  |
| 6                                          | -5.461583000 | 3.662621000  | 1.184872000  |
| 6                                          | 1.615212000  | -1.009317000 | -2.623268000 |
| 6                                          | 2.843218000  | -1.773863000 | -2.987931000 |
| 6                                          | 2.902320000  | -2.450900000 | -4.222821000 |
| 6                                          | 4.001106000  | -3.223723000 | -4.596917000 |
| 6                                          | 5.086962000  | -3.346264000 | -3.725009000 |
| 6                                          | 5.061234000  | -2.683670000 | -2.497738000 |
| 6                                          | 3.958339000  | -1.897008000 | -2.139106000 |
| 8                                          | 3.949154000  | -1.271529000 | -0.899450000 |
| 6                                          | 4.989068000  | -0.318340000 | -0.705531000 |
| 6                                          | 5.254550000  | 0.021276000  | 0.756976000  |
| 7                                          | 5.237915000  | -0.971871000 | 1.713268000  |
| 8                                          | -3.811257000 | 0.609076000  | 2.308891000  |
| 6                                          | -4.081151000 | -0.539675000 | 3.107319000  |
| 6                                          | -3.625205000 | -1.731746000 | 2.251663000  |
| 8                                          | -4.457422000 | -2.272965000 | 1.531316000  |
| 7                                          | -0.834158000 | -1.250443000 | -2.319915000 |
| 6                                          | 0.432279000  | -1.758639000 | -2.493591000 |
| 6                                          | 0.354198000  | -3.210850000 | -2.572179000 |
| 6                                          | -0.968831000 | -3.546920000 | -2.493479000 |
| 6                                          | -1.716014000 | -2.314843000 | -2.321766000 |
| 6                                          | -3.096343000 | -2.244136000 | -2.080456000 |
| 6                                          | -3.898431000 | -3.479699000 | -2.301006000 |
| 6                                          | -4.669567000 | -4.043314000 | -1.264795000 |
| 6                                          | -5.393692000 | -5.219582000 | -1.474613000 |
| 6                                          | -5.370699000 | -5.855843000 | -2.721211000 |
| 6                                          | -4.613078000 | -5.304417000 | -3.759186000 |
| 6                                          | -3.885848000 | -4.129451000 | -3.549654000 |
| 7                                          | -3.109044000 | 0.048783000  | -1.126049000 |
| 6                                          | -3.756013000 | -1.097023000 | -1.559999000 |
| 6                                          | -5.157536000 | -0.970412000 | -1.291035000 |
| 6                                          | -5.336010000 | 0.236475000  | -0.635857000 |
| 6                                          | -4.047033000 | 0.850842000  | -0.553170000 |
| 8                                          | 5.486906000  | 1.192963000  | 1.025793000  |
| 1                                          | -4.682277000 | -3.552213000 | -0.290179000 |
| 1                                          | 1.200646000  | -3.885837000 | -2.671777000 |
| 1                                          | -1.397588000 | -4.546020000 | -2.509241000 |
| 1                                          | 3.691771000  | 0.802837000  | -3.555502000 |
| 1                                          | 2.945048000  | 3.397131000  | -3.404960000 |
| 1                                          | -0.990022000 | 5.803004000  | -0.621983000 |
| 1                                          | -3.143170000 | 4.908611000  | 0.696915000  |
| 1                                          | -6.265262000 | 0.667487000  | -0.266754000 |
| 1                                          | -5.918907000 | -1.705041000 | -1.540546000 |
| 1                                          | 2.049076000  | -2.356535000 | -4.897431000 |
| 1                                          | 4.009774000  | -3.729818000 | -5.564879000 |
| 1                                          | 5.951739000  | -3.957034000 | -3.993460000 |
| 1                                          | 5.903228000  | -2.783806000 | -1.810197000 |
| 1                                          | -0.692118000 | 5.857236000  | -3.431824000 |
| 1                                          | 0.314097000  | 8.106044000  | -3.738498000 |
| 1                                          | 2.571730000  | 8.607747000  | -2.792103000 |
| 1                                          | 3.798450000  | 6.828240000  | -1.534448000 |
| 1                                          | 2.789134000  | 4.594770000  | -1.238917000 |
| 1                                          | -5.482469000 | 4.300988000  | 0.299113000  |
| 1                                          | -6.897119000 | 4.868359000  | 2.265038000  |
| 1                                          | -6.886523000 | 3.368977000  | 4.269295000  |
| 1                                          | -5.440502000 | 1.356094000  | 4.301964000  |
| 1                                          | -5.977060000 | -5.647520000 | -0.654823000 |
| 1                                          | -5.939668000 | -6.774916000 | -2.882437000 |
| 1                                          | -4.591315000 | -5.788318000 | -4.739130000 |
| 1                                          | -3.300146000 | -3.698791000 | -4.364685000 |
| 1                                          | 5.935725000  | -0.671663000 | -1.148132000 |
| 1                                          | 4.717317000  | 0.626894000  | -1.197207000 |
| 1                                          | -3.582859000 | -0.458431000 | 4.086316000  |
| 1                                          | -5.161326000 | -0.659353000 | 3.268200000  |
| 7                                          | -2.296591000 | -2.051389000 | 2.244225000  |
| 19                                         | 2.044674000  | -1.154445000 | 1.307954000  |
| 8                                          | 0.491740000  | -0.328685000 | 3.665609000  |
| 8                                          | 0.528017000  | -3.532658000 | 1.357197000  |
| 8                                          | 3.287950000  | 0.170343000  | 3.518076000  |
| 8                                          | 3.355262000  | -3.396017000 | 2.136995000  |
| 6                                          | -0.842566000 | -3.939295000 | 1.329638000  |
| 1                                          | -1.098508000 | -4.471534000 | 2.265309000  |
| 6                                          | -1.782711000 | -2.776244000 | 1.073537000  |
| 1                                          | -0.965038000 | -4.656876000 | 0.498546000  |
| 1                                          | -2.659658000 | -3.164123000 | 0.549639000  |
| 1                                          | -1.291775000 | -2.061102000 | 0.399859000  |
| 6                                          | 1.401463000  | -4.643490000 | 1.446426000  |
| 1                                          | 1.351296000  | -5.093948000 | 2.455740000  |
| 1                                          | 1.099629000  | -5.418283000 | 0.716894000  |
| 6                                          | 2.829021000  | -4.259594000 | 1.127350000  |
| 1                                          | 3.428890000  | -5.183808000 | 1.084352000  |
| 1                                          | 2.885212000  | -3.776512000 | 0.134330000  |
| 6                                          | 4.773825000  | -3.389797000 | 2.276308000  |
| 1                                          | 4.981824000  | -3.201743000 | 3.337880000  |
| 1                                          | 5.172029000  | -4.390874000 | 2.042176000  |
| 6                                          | 5.495843000  | -2.381472000 | 1.388162000  |
| 1                                          | 6.578151000  | -2.582528000 | 1.490122000  |
| 1                                          | 5.223621000  | -2.566653000 | 0.346865000  |
| 6                                          | -1.412654000 | -1.755620000 | 3.368640000  |
| 6                                          | -0.927190000 | -0.309226000 | 3.516707000  |
| 1                                          | -1.893497000 | -2.087994000 | 4.300800000  |
| 1                                          | -0.524547000 | -2.388354000 | 3.257880000  |
| 1                                          | -1.364690000 | 0.161018000  | 4.416209000  |
| 1                                          | -1.210057000 | 0.294875000  | 2.648240000  |
| 6                                          | 1.053048000  | 0.933831000  | 3.996257000  |
| 1                                          | 0.456087000  | 1.417469000  | 4.791298000  |
| 6                                          | 2.449056000  | 0.719951000  | 4.524785000  |
| 1                                          | 1.030714000  | 1.596591000  | 3.115739000  |
| 1                                          | 2.860479000  | 1.682716000  | 4.880426000  |
| 1                                          | 2.395252000  | 0.032840000  | 5.387362000  |
| 6                                          | 5.561606000  | -0.544916000 | 3.079095000  |
| 1                                          | 6.354655000  | -1.193851000 | 3.483840000  |
| 1                                          | 5.961824000  | 0.472513000  | 3.008843000  |
| 6                                          | 4.393184000  | -0.545615000 | 4.053619000  |
| 1                                          | 4.750172000  | -0.064617000 | 4.981389000  |
| 1                                          | 4.055413000  | -1.560870000 | 4.320215000  |
| 8                                          | 1.779160000  | -2.763810000 | 4.471797000  |
| 1                                          | 1.360228000  | -1.917261000 | 4.229814000  |







|                         |              |              |              |   |              |              |              |
|-------------------------|--------------|--------------|--------------|---|--------------|--------------|--------------|
| 6                       | -2.572561000 | -2.113832000 | 2.787453000  | 6 | -2.323940000 | 4.579789000  | 0.537506000  |
| 1                       | -2.173630000 | -4.118908000 | 3.328517000  | 6 | -1.436793000 | 3.960610000  | -0.431825000 |
| 1                       | -3.619861000 | -2.442382000 | 2.850866000  | 6 | -4.064533000 | 1.530766000  | -0.352932000 |
| 1                       | -2.290569000 | -2.133478000 | 1.725190000  | 6 | -5.130135000 | 1.362424000  | 0.681741000  |
| 6                       | 0.337304000  | -4.220678000 | 3.720419000  | 6 | -4.884904000 | 0.425995000  | 1.718292000  |
| 1                       | 0.548938000  | -4.015422000 | 4.785164000  | 6 | -5.817381000 | 0.257469000  | 2.749089000  |
| 1                       | -0.276559000 | -5.138524000 | 3.666545000  | 6 | -7.006695000 | 0.995974000  | 2.737849000  |
| 6                       | 1.622812000  | -4.510648000 | 2.978534000  | 6 | -7.266909000 | 1.910568000  | 1.716735000  |
| 1                       | 2.019491000  | -5.468484000 | 3.355295000  | 6 | -6.321302000 | 2.090949000  | 0.699670000  |
| 1                       | 1.419585000  | -4.627358000 | 1.898531000  | 6 | 2.075642000  | 0.822619000  | -3.211940000 |
| 6                       | 3.935801000  | -3.838238000 | 2.867091000  | 6 | 3.516786000  | 0.522541000  | -3.456120000 |
| 1                       | 4.584338000  | -3.387275000 | 3.629703000  | 6 | 4.051556000  | 0.448913000  | -4.750312000 |
| 1                       | 4.060460000  | -4.929894000 | 2.947427000  | 6 | 5.414015000  | 0.224177000  | -4.959343000 |
| 6                       | 4.367154000  | -3.425581000 | 1.461839000  | 6 | 6.264226000  | 0.067809000  | -3.861254000 |
| 1                       | 5.356718000  | -3.883217000 | 1.278939000  | 6 | 5.750905000  | 0.119190000  | -2.563140000 |
| 1                       | 3.661203000  | -3.852603000 | 0.741435000  | 6 | 4.382730000  | 0.337238000  | -2.359705000 |
| 6                       | -1.496625000 | -0.244738000 | 4.171229000  | 8 | 3.834335000  | 0.301200000  | -1.094111000 |
| 6                       | -0.598471000 | 0.875758000  | 3.628349000  | 6 | 4.308441000  | 1.234523000  | -0.133421000 |
| 1                       | -1.945481000 | 0.053044000  | 5.131870000  | 6 | 4.266978000  | 0.799993000  | 1.339834000  |
| 1                       | -0.841529000 | -1.092500000 | 4.393762000  | 7 | 4.754303000  | -0.423253000 | 1.742509000  |
| 1                       | -0.803235000 | 1.832870000  | 4.138519000  | 8 | -3.696545000 | -0.227360000 | 1.647881000  |
| 1                       | -0.762530000 | 1.017941000  | 2.551075000  | 6 | -3.411268000 | -1.362358000 | 2.433920000  |
| 6                       | 1.671296000  | 1.589470000  | 3.684267000  | 6 | -2.672278000 | -2.371168000 | 1.542280000  |
| 1                       | 1.416013000  | 2.419218000  | 4.368797000  | 8 | -2.940521000 | -2.412600000 | 0.352082000  |
| 6                       | 3.061553000  | 1.100314000  | 3.997173000  | 7 | -0.222369000 | -0.101299000 | -3.291570000 |
| 1                       | 1.618695000  | 1.957908000  | 2.647124000  | 6 | 1.133884000  | -0.185531000 | -3.497164000 |
| 1                       | 3.757068000  | 1.959424000  | 4.014792000  | 6 | 1.456750000  | -1.498169000 | -4.024023000 |
| 1                       | 3.074294000  | 0.631930000  | 4.997130000  | 6 | 0.278652000  | -2.187956000 | -4.120165000 |
| 6                       | 5.272553000  | -1.192304000 | 2.173288000  | 6 | -0.772021000 | -1.305971000 | -3.639422000 |
| 1                       | 6.098544000  | -1.835084000 | 2.518701000  | 6 | -2.123022000 | -1.687928000 | -3.449727000 |
| 1                       | 5.706716000  | -0.370972000 | 1.591509000  | 6 | -2.505417000 | -3.070336000 | -3.862958000 |
| 6                       | 4.587269000  | -0.602258000 | 3.396290000  | 6 | -2.882244000 | -4.007310000 | -2.882047000 |
| 1                       | 5.334605000  | 0.033908000  | 3.905156000  | 6 | -3.211128000 | -5.316270000 | -3.242177000 |
| 1                       | 4.272096000  | -1.372275000 | 4.121493000  | 6 | -3.171516000 | -5.709178000 | -4.584634000 |
| 8                       | 1.776956000  | -1.712160000 | 5.369808000  | 6 | -2.799154000 | -4.784724000 | -5.565828000 |
| 1                       | 1.388854000  | -0.951289000 | 4.900815000  | 6 | -2.466125000 | -3.475493000 | -5.206826000 |
| 1                       | 2.117980000  | -2.300298000 | 4.674001000  | 7 | -2.851752000 | 0.235400000  | -2.079803000 |
| 6                       | -0.437750000 | 0.105529000  | -0.036414000 | 6 | -3.091516000 | -0.932825000 | -2.755505000 |
| 8                       | -0.856223000 | -0.765953000 | 0.722972000  | 6 | -4.459441000 | -1.354621000 | -2.498880000 |
| 8                       | 0.711486000  | 0.740132000  | 0.468326000  | 6 | -4.979116000 | -0.483518000 | -1.584663000 |
| 6                       | 4.764338000  | 2.904938000  | 1.134074000  | 6 | -3.952094000 | 0.502389000  | -1.311107000 |
| 1                       | 4.791274000  | 2.959563000  | 2.234322000  | 8 | 3.890852000  | 1.643718000  | 2.146693000  |
| 1                       | 5.711303000  | 3.297373000  | 0.744670000  | 1 | -2.906958000 | -3.694685000 | -1.834963000 |
| 1                       | 4.619967000  | 1.854056000  | 0.850925000  | 1 | 2.453742000  | -1.848309000 | -4.279478000 |
| 6                       | 3.629399000  | 3.759551000  | 0.645132000  | 1 | 0.138205000  | -3.209870000 | -4.462154000 |
| 8                       | 3.717979000  | 4.911089000  | 0.281124000  | 1 | 3.767633000  | 3.163084000  | -2.934411000 |
| 8                       | 2.451614000  | 3.107343000  | 0.681054000  | 1 | 2.528448000  | 5.175906000  | -1.641297000 |
| 1                       | 1.049534000  | 1.370372000  | -0.185420000 | 1 | -2.139896000 | 5.521056000  | 1.048760000  |
| 1                       | 1.752197000  | 3.703740000  | 0.338971000  | 1 | -4.240237000 | 3.863710000  | 1.363533000  |
|                         |              |              |              | 1 | -5.969283000 | -0.496490000 | -1.134953000 |
|                         |              |              |              | 1 | -4.946002000 | -2.219909000 | -2.941098000 |
|                         |              |              |              | 1 | 3.381020000  | 0.590517000  | -5.600684000 |
|                         |              |              |              | 1 | 5.811505000  | 0.179596000  | -5.975428000 |
|                         |              |              |              | 1 | 7.332304000  | -0.105394000 | -4.010476000 |
|                         |              |              |              | 1 | 6.416911000  | -0.020365000 | -1.710475000 |
|                         |              |              |              | 1 | -1.135461000 | 6.942498000  | 1.243842000  |
|                         |              |              |              | 1 | -0.407232000 | 9.076330000  | -0.192613000 |
|                         |              |              |              | 1 | 1.432192000  | 9.074871000  | 1.493711000  |
|                         |              |              |              | 1 | 2.531468000  | 6.923801000  | 2.122787000  |
|                         |              |              |              | 1 | 1.791673000  | 4.793209000  | 1.070410000  |
|                         |              |              |              | 1 | -6.506428000 | 2.809190000  | -0.102342000 |
|                         |              |              |              | 1 | -8.194967000 | 2.485780000  | 1.711621000  |
|                         |              |              |              | 1 | -7.728132000 | 0.854458000  | 3.544536000  |
|                         |              |              |              | 1 | -5.618779000 | -0.432228000 | 3.569725000  |
|                         |              |              |              | 1 | -3.495451000 | -6.035059000 | -2.469537000 |
|                         |              |              |              | 1 | -3.429331000 | -6.733215000 | -4.865375000 |
|                         |              |              |              | 1 | -2.769748000 | -5.083079000 | -6.616654000 |
| <b>5TS2 acetate,K+:</b> |              |              |              |   |              |              |              |
| 6                       | 1.319428000  | 5.736948000  | 0.787706000  |   |              |              |              |
| 6                       | 0.285733000  | 5.726100000  | -0.165112000 |   |              |              |              |
| 6                       | -0.330897000 | 6.941051000  | -0.505075000 |   |              |              |              |
| 6                       | 0.079536000  | 8.138781000  | 0.086841000  |   |              |              |              |
| 6                       | 1.111601000  | 8.138672000  | 1.030562000  |   |              |              |              |
| 6                       | 1.729603000  | 6.933374000  | 1.380500000  |   |              |              |              |
| 6                       | -0.154918000 | 4.437465000  | -0.776474000 |   |              |              |              |
| 6                       | 0.784473000  | 3.738687000  | -1.567857000 |   |              |              |              |
| 7                       | 0.613345000  | 2.475431000  | -2.079726000 |   |              |              |              |
| 6                       | 1.799317000  | 2.089466000  | -2.652329000 |   |              |              |              |
| 6                       | 2.752756000  | 3.174850000  | -2.544394000 |   |              |              |              |
| 6                       | 2.121123000  | 4.199203000  | -1.888997000 |   |              |              |              |
| 26                      | -1.033407000 | 1.206982000  | -1.840432000 |   |              |              |              |
| 7                       | -1.993804000 | 2.786927000  | -0.864844000 |   |              |              |              |
| 6                       | -3.176106000 | 2.613252000  | -0.192255000 |   |              |              |              |
| 6                       | -3.385628000 | 3.735915000  | 0.704166000  |   |              |              |              |



|                                     |              |              |              |    |              |              |              |
|-------------------------------------|--------------|--------------|--------------|----|--------------|--------------|--------------|
| 1                                   | -2.176264000 | -2.754432000 | -5.974445000 | 6  | -0.598245000 | 7.169106000  | -3.562801000 |
| 1                                   | 5.354351000  | 1.516234000  | -0.348392000 | 6  | 0.400713000  | 7.689918000  | -2.734337000 |
| 1                                   | 3.698870000  | 2.146757000  | -0.183279000 | 6  | 1.066460000  | 6.847285000  | -1.837014000 |
| 1                                   | -2.832780000 | -1.056937000 | 3.311782000  | 6  | -0.605500000 | 3.509042000  | -2.510417000 |
| 1                                   | -4.331547000 | -1.865603000 | 2.777181000  | 6  | 0.372757000  | 2.585713000  | -2.940981000 |
| 7                                   | -1.780273000 | -3.233197000 | 2.138516000  | 7  | 0.278835000  | 1.216492000  | -2.877744000 |
| 19                                  | 1.447310000  | -1.176305000 | 2.108932000  | 6  | 1.463330000  | 0.693445000  | -3.331928000 |
| 8                                   | 0.402343000  | -2.550508000 | 4.385634000  | 6  | 2.343172000  | 1.774697000  | -3.716200000 |
| 8                                   | 1.048405000  | -3.696051000 | 1.090255000  | 6  | 1.661927000  | 2.943241000  | -3.491168000 |
| 8                                   | 3.057095000  | -1.188204000 | 4.236249000  | 26 | -1.252336000 | 0.126376000  | -2.012177000 |
| 8                                   | 3.609046000  | -3.048412000 | 1.051671000  | 7  | -2.289150000 | 1.897362000  | -1.687368000 |
| 6                                   | 0.149173000  | -4.714488000 | 1.489409000  | 6  | -3.455421000 | 1.991877000  | -0.984325000 |
| 1                                   | 0.370478000  | -4.947623000 | 2.541270000  | 6  | -3.779763000 | 3.390388000  | -0.772725000 |
| 6                                   | -1.303404000 | -4.331814000 | 1.288793000  | 6  | -2.789341000 | 4.120818000  | -1.366390000 |
| 1                                   | 0.339428000  | -5.637901000 | 0.916450000  | 6  | -1.838244000 | 3.172114000  | -1.923128000 |
| 1                                   | -1.923572000 | -5.230701000 | 1.468294000  | 6  | -4.233189000 | 0.907413000  | -0.530538000 |
| 1                                   | -1.462131000 | -4.027375000 | 0.249613000  | 6  | -5.214369000 | 1.183462000  | 0.559074000  |
| 6                                   | 1.732852000  | -3.904414000 | -0.129895000 | 6  | -4.702765000 | 1.489313000  | 1.843357000  |
| 1                                   | 2.102529000  | -4.944937000 | -0.173103000 | 6  | -5.569491000 | 1.630037000  | 2.932648000  |
| 1                                   | 1.077282000  | -3.729817000 | -1.003087000 | 6  | -6.949164000 | 1.490490000  | 2.750187000  |
| 6                                   | 2.910949000  | -2.949816000 | -0.185755000 | 6  | -7.470866000 | 1.224967000  | 1.482565000  |
| 1                                   | 3.562509000  | -3.235202000 | -1.029509000 | 6  | -6.600198000 | 1.069375000  | 0.399092000  |
| 1                                   | 2.583770000  | -1.911659000 | -0.368887000 | 6  | 1.782124000  | -0.679800000 | -3.432828000 |
| 6                                   | 5.004222000  | -2.819414000 | 1.022625000  | 6  | 3.198888000  | -1.020755000 | -3.760920000 |
| 1                                   | 5.393452000  | -3.200313000 | 1.975973000  | 6  | 3.563562000  | -1.548506000 | -5.008382000 |
| 1                                   | 5.476870000  | -3.412313000 | 0.218079000  | 6  | 4.891973000  | -1.863632000 | -5.301691000 |
| 6                                   | 5.385840000  | -1.356974000 | 0.809477000  | 6  | 5.881044000  | -1.661605000 | -4.334728000 |
| 1                                   | 6.486278000  | -1.281358000 | 0.885449000  | 6  | 5.541242000  | -1.147474000 | -3.081598000 |
| 1                                   | 5.100046000  | -1.077095000 | -0.203638000 | 6  | 4.209791000  | -0.823300000 | -2.800956000 |
| 6                                   | -1.763158000 | -3.475187000 | 3.589521000  | 8  | 3.834630000  | -0.372944000 | -1.551545000 |
| 6                                   | -1.020267000 | -2.512380000 | 4.506341000  | 6  | 4.490275000  | 0.777030000  | -1.028669000 |
| 1                                   | -2.796890000 | -3.517408000 | 3.971913000  | 6  | 4.594393000  | 0.926214000  | 0.496381000  |
| 1                                   | -1.355524000 | -4.483202000 | 3.744073000  | 7  | 4.950488000  | -0.111926000 | 1.322824000  |
| 1                                   | -1.293291000 | -2.803427000 | 5.538199000  | 8  | -3.357610000 | 1.699891000  | 1.940799000  |
| 1                                   | -1.341836000 | -1.473864000 | 4.350850000  | 6  | -2.609987000 | 1.228702000  | 3.038116000  |
| 6                                   | 0.987965000  | -1.694585000 | 5.371276000  | 6  | -2.418089000 | -0.287034000 | 2.947160000  |
| 1                                   | 0.616964000  | -1.984043000 | 6.371461000  | 8  | -2.948731000 | -0.907772000 | 2.037406000  |
| 6                                   | 2.493363000  | -1.794889000 | 5.389453000  | 7  | -0.430921000 | -1.623046000 | -2.859420000 |
| 1                                   | 0.673828000  | -0.652223000 | 5.183241000  | 6  | 0.884476000  | -1.745575000 | -3.233828000 |
| 1                                   | 2.857880000  | -1.280070000 | 6.298621000  | 6  | 1.207286000  | -3.154036000 | -3.387906000 |
| 1                                   | 2.798725000  | -2.852106000 | 5.450642000  | 6  | 0.067368000  | -3.856104000 | -3.112945000 |
| 6                                   | 5.146364000  | -0.542852000 | 3.155855000  | 6  | -0.955262000 | -2.884502000 | -2.761583000 |
| 1                                   | 6.215380000  | -0.816344000 | 3.179273000  | 6  | -2.243751000 | -3.209505000 | -2.286005000 |
| 1                                   | 5.040638000  | 0.453932000  | 3.599891000  | 6  | -2.589521000 | -4.664328000 | -2.223871000 |
| 6                                   | 4.418949000  | -1.539378000 | 4.046980000  | 6  | -2.610630000 | -5.340622000 | -0.992941000 |
| 1                                   | 4.947563000  | -1.514395000 | 5.018283000  | 6  | -2.914985000 | -6.702989000 | -0.933745000 |
| 1                                   | 4.470477000  | -2.573656000 | 3.674583000  | 6  | -3.201209000 | -7.409855000 | -2.106422000 |
| 8                                   | 2.601955000  | -4.348515000 | 3.502995000  | 6  | -3.179204000 | -6.746671000 | -3.337315000 |
| 1                                   | 1.793003000  | -3.880979000 | 3.772584000  | 6  | -2.874213000 | -5.383618000 | -3.394965000 |
| 1                                   | 2.770803000  | -4.011852000 | 2.603965000  | 7  | -3.034082000 | -0.928110000 | -1.692916000 |
| 6                                   | -0.254129000 | -0.051603000 | -0.382980000 | 6  | -3.183883000 | -2.293649000 | -1.768430000 |
| 8                                   | -0.179960000 | -1.163346000 | -0.041212000 | 6  | -4.411188000 | -2.670032000 | -1.094750000 |
| 8                                   | 1.013279000  | 0.943552000  | 0.584591000  | 6  | -4.932212000 | -1.531666000 | -0.544575000 |
| 6                                   | -2.142033000 | 2.063385000  | 3.737700000  | 6  | -4.063133000 | -0.436996000 | -0.922400000 |
| 1                                   | -1.947441000 | 3.124875000  | 3.942564000  | 8  | 4.513869000  | 2.078357000  | 0.910342000  |
| 1                                   | -2.320690000 | 1.513077000  | 4.669917000  | 1  | -2.379975000 | -4.789203000 | -0.078486000 |
| 1                                   | -3.046232000 | 2.008382000  | 3.112127000  | 1  | 2.178682000  | -3.550981000 | -3.671079000 |
| 6                                   | -1.002778000 | 1.445374000  | 2.963439000  | 1  | -0.068065000 | -4.934415000 | -3.128659000 |
| 8                                   | -0.645466000 | 0.278739000  | 3.153834000  | 1  | 3.340721000  | 1.657404000  | -4.132632000 |
| 8                                   | -0.463789000 | 2.225772000  | 2.075177000  | 1  | 2.005880000  | 3.956177000  | -3.681714000 |
| 1                                   | 1.272986000  | 1.559899000  | -0.115966000 | 1  | -2.692863000 | 5.202408000  | -1.406850000 |
| 1                                   | 0.222846000  | 1.670739000  | 1.427239000  | 1  | -4.657683000 | 3.756252000  | -0.245022000 |
|                                     |              |              |              | 1  | -5.824669000 | -1.443544000 | 0.068021000  |
|                                     |              |              |              | 1  | -4.806136000 | -3.679806000 | -1.022866000 |
|                                     |              |              |              | 1  | 2.784527000  | -1.700834000 | -5.758303000 |
|                                     |              |              |              | 1  | 5.154060000  | -2.265711000 | -6.282476000 |
|                                     |              |              |              | 1  | 6.922050000  | -1.912962000 | -4.549316000 |
| <b><sup>51</sup>M2 acetate, K+:</b> |              |              |              |    |              |              |              |
| 6                                   | 0.738269000  | 5.490940000  | -1.768703000 |    |              |              |              |
| 6                                   | -0.261610000 | 4.960241000  | -2.602020000 |    |              |              |              |
| 6                                   | -0.928248000 | 5.811875000  | -3.495848000 |    |              |              |              |



|    |              |              |              |                              |              |              |              |
|----|--------------|--------------|--------------|------------------------------|--------------|--------------|--------------|
| 8  | -5.443244000 | 0.190987000  | -0.598825000 | 6                            | -5.449600000 | -2.073071000 | -2.017486000 |
| 1  | 5.017811000  | -2.449220000 | 1.388600000  | 1                            | -6.233842000 | -2.847046000 | -1.969669000 |
| 1  | 0.260388000  | -2.486643000 | 4.788758000  | 1                            | -5.950932000 | -1.112851000 | -2.169284000 |
| 1  | 2.953897000  | -2.348087000 | 4.636940000  | 6                            | -4.561309000 | -2.363135000 | -3.222931000 |
| 1  | -3.351687000 | 1.231279000  | 3.965459000  | 1                            | -5.182179000 | -2.182680000 | -4.119854000 |
| 1  | -3.150800000 | 3.775292000  | 3.115770000  | 1                            | -4.235068000 | -3.414707000 | -3.269315000 |
| 1  | -0.310061000 | 5.745796000  | -1.001432000 | 8                            | -1.874895000 | -4.382810000 | -3.967735000 |
| 1  | 1.733383000  | 4.751626000  | -2.457456000 | 1                            | -1.387957000 | -3.538144000 | -3.955566000 |
| 1  | 5.776015000  | 1.569422000  | -0.996792000 | 1                            | -2.286622000 | -4.424754000 | -3.086133000 |
| 1  | 6.239719000  | 0.047526000  | 1.193278000  | 6                            | 0.797870000  | 0.237412000  | -0.082115000 |
| 1  | -1.293244000 | -1.207317000 | 5.901438000  | 8                            | 0.921627000  | -0.997893000 | 0.051103000  |
| 1  | -3.095950000 | -2.597002000 | 6.877991000  | 8                            | 0.408991000  | 0.790006000  | -1.147788000 |
| 1  | -5.006450000 | -3.346777000 | 5.439309000  | 6                            | -3.613611000 | 1.658777000  | -2.750022000 |
| 1  | -5.064793000 | -2.694138000 | 3.041597000  | 1                            | -3.823969000 | 2.733914000  | -2.791823000 |
| 1  | 0.112007000  | 6.602727000  | 1.651248000  | 1                            | -4.508578000 | 1.076542000  | -2.516865000 |
| 1  | -1.096601000 | 8.766205000  | 1.743494000  | 1                            | -3.239672000 | 1.367147000  | -3.742247000 |
| 1  | -3.583595000 | 8.823758000  | 1.509637000  | 6                            | -2.530697000 | 1.364944000  | -1.747379000 |
| 1  | -4.835570000 | 6.686233000  | 1.184476000  | 8                            | -2.524897000 | 0.410235000  | -0.992695000 |
| 1  | -3.626830000 | 4.532377000  | 1.087821000  | 8                            | -1.515112000 | 2.228945000  | -1.787257000 |
| 1  | 4.127379000  | 4.817925000  | -2.241196000 | 1                            | -0.703444000 | 1.785043000  | -1.324185000 |
| 1  | 5.177550000  | 5.046687000  | -4.484982000 | 8                            | -3.052231000 | 4.575196000  | -1.677727000 |
| 1  | 5.399796000  | 3.029907000  | -5.951933000 | 1                            | -2.939365000 | 5.234945000  | -0.977432000 |
| 1  | 4.568428000  | 0.837058000  | -5.177006000 | 1                            | -2.264290000 | 4.003299000  | -1.606463000 |
| 1  | 6.852747000  | -3.927221000 | 2.205673000  | 8                            | -0.954745000 | -3.163880000 | 1.492550000  |
| 1  | 7.805325000  | -3.587153000 | 4.487613000  | 1                            | -1.069276000 | -2.303511000 | 1.922227000  |
| 1  | 6.912156000  | -1.767314000 | 5.942303000  | 1                            | 0.027360000  | -3.266807000 | 1.469803000  |
| 1  | 5.077881000  | -0.299626000 | 5.117136000  | 8                            | -4.769899000 | 2.884799000  | 0.028314000  |
| 1  | -5.195616000 | -0.616958000 | 1.992225000  | 1                            | -4.984415000 | 1.982873000  | -0.279138000 |
| 1  | -4.043910000 | 0.555284000  | 1.318327000  | 1                            | -4.272859000 | 3.326627000  | -0.683451000 |
| 1  | 3.189256000  | -0.941359000 | -4.367517000 | 8                            | 1.772176000  | -3.050413000 | 1.434267000  |
| 1  | 4.825941000  | -0.813255000 | -3.674012000 | 1                            | 2.012700000  | -2.808602000 | 2.343707000  |
| 7  | 2.530609000  | -2.820930000 | -2.574856000 | 1                            | 1.579355000  | -2.176604000 | 1.000908000  |
| 19 | -1.441567000 | -2.060690000 | -1.048809000 | 8                            | 0.689679000  | 1.846320000  | -3.739990000 |
| 8  | -0.661443000 | -1.816519000 | -3.827414000 | 1                            | 1.0987261000 | 1.405795000  | -2.922343000 |
| 8  | 0.158971000  | -4.574995000 | -1.355226000 | 1                            | -0.091165000 | 2.322038000  | -3.420104000 |
| 8  | -3.422758000 | -1.523986000 | -3.228098000 |                              |              |              |              |
| 8  | -2.842811000 | -4.468024000 | -1.225011000 |                              |              |              |              |
| 6  | 1.459983000  | -4.986696000 | -1.751989000 | <b>3TS1 acetate, 6W, K+:</b> |              |              |              |
| 1  | 1.440905000  | -5.384439000 | -2.784922000 | 6                            | -3.229496000 | 5.462800000  | 1.033725000  |
| 6  | 2.496483000  | -3.901264000 | -1.574013000 | 6                            | -1.829239000 | 5.426299000  | 1.192271000  |
| 1  | 1.778725000  | -5.823316000 | -1.102751000 | 6                            | -1.152040000 | 6.647434000  | 1.379778000  |
| 1  | 3.483593000  | -4.390848000 | -1.581634000 | 6                            | -1.843795000 | 7.859397000  | 1.410988000  |
| 1  | 2.377059000  | -3.471483000 | -0.571751000 | 6                            | -3.233225000 | 7.881221000  | 1.250480000  |
| 6  | -0.724474000 | -5.682882000 | -1.285063000 | 6                            | -3.919834000 | 6.678752000  | 1.061252000  |
| 1  | -0.967122000 | -6.038267000 | -2.302171000 | 6                            | -1.048679000 | 4.157050000  | 1.160931000  |
| 1  | -0.228591000 | -6.513586000 | -0.747545000 | 6                            | -1.433692000 | 3.082110000  | 1.969846000  |
| 6  | -1.986226000 | -5.375016000 | -0.514156000 | 7                            | -0.752659000 | 1.863919000  | 2.051871000  |
| 1  | -2.517231000 | -6.332516000 | -0.375979000 | 6                            | -1.527052000 | 1.028125000  | 2.810979000  |
| 1  | -1.740095000 | -4.949783000 | 0.470894000  | 6                            | -2.730635000 | 1.712235000  | 3.219680000  |
| 6  | -4.193841000 | -4.464408000 | -0.762108000 | 6                            | -2.638573000 | 2.997357000  | 2.753527000  |
| 1  | -4.847937000 | -4.608441000 | -1.633123000 | 26                           | 1.064916000  | 1.471524000  | 1.404410000  |
| 1  | -4.355137000 | -5.332117000 | -0.104024000 | 7                            | 1.014750000  | 3.082525000  | 0.262718000  |
| 6  | -4.599405000 | -3.235476000 | 0.043957000  | 6                            | 1.789184000  | 3.285166000  | -0.862602000 |
| 1  | -5.562071000 | -3.493474000 | 0.524019000  | 6                            | 1.266021000  | 4.392809000  | -1.608819000 |
| 1  | -3.864861000 | -3.070574000 | 0.837555000  | 6                            | 0.217735000  | 4.913098000  | -0.879348000 |
| 6  | 1.539391000  | -2.732928000 | -3.642709000 | 6                            | 0.042561000  | 4.078302000  | 0.269063000  |
| 6  | 0.703971000  | -1.449496000 | -3.624404000 | 6                            | 2.973452000  | 2.568924000  | -1.152776000 |
| 1  | 2.010476000  | -2.884694000 | -4.627029000 | 6                            | 3.654217000  | 2.705924000  | -2.464870000 |
| 1  | 0.837968000  | -3.560921000 | -3.508244000 | 6                            | 3.866773000  | 1.555161000  | -3.270556000 |
| 1  | 1.007087000  | -0.741532000 | -4.410493000 | 6                            | 4.511641000  | 1.657340000  | -4.508445000 |
| 1  | 0.812188000  | -0.928082000 | -2.659980000 | 6                            | 4.961986000  | 2.901643000  | -4.964895000 |
| 6  | -1.465961000 | -0.806472000 | -4.417002000 | 6                            | 4.771337000  | 4.043745000  | -4.187442000 |
| 1  | -1.097302000 | -0.574711000 | -5.433507000 | 6                            | 4.126425000  | 3.933714000  | -2.950890000 |
| 6  | -2.883285000 | -1.317701000 | -4.519750000 | 6                            | -1.139510000 | -0.229009000 | 3.323262000  |
| 1  | -1.390944000 | 0.121509000  | -3.829570000 | 6                            | -2.202784000 | -1.084060000 | 3.909141000  |
| 1  | -3.494723000 | -0.586784000 | -5.082894000 | 6                            | -2.226813000 | -1.430268000 | 5.274597000  |
| 1  | -2.878720000 | -2.263279000 | -5.088850000 | 6                            | -3.242295000 | -2.214601000 | 5.822680000  |
|    |              |              |              | 6                            | -4.279055000 | -2.677249000 | 5.007065000  |

|    |              |              |              |                                         |              |              |              |
|----|--------------|--------------|--------------|-----------------------------------------|--------------|--------------|--------------|
| 6  | -4.288586000 | -2.347253000 | 3.650536000  | 1                                       | 1.964198000  | -5.798962000 | -0.821768000 |
| 6  | -3.269442000 | -1.557204000 | 3.106776000  | 1                                       | 3.648272000  | -4.346860000 | -1.328893000 |
| 8  | -3.260584000 | -1.287941000 | 1.752342000  | 1                                       | 2.492347000  | -3.413961000 | -0.389520000 |
| 6  | -4.363349000 | -0.564177000 | 1.231380000  | 6                                       | -0.536323000 | -5.724214000 | -1.073561000 |
| 6  | -4.825928000 | -0.876743000 | -0.189540000 | 1                                       | -0.744747000 | -6.138252000 | -0.475976000 |
| 7  | -4.681447000 | -2.107081000 | -0.779099000 | 1                                       | -0.037870000 | -6.513912000 | -0.079553000 |
| 8  | 3.382903000  | 0.372317000  | -2.788023000 | 6                                       | -1.824119000 | -5.401926000 | -0.353997000 |
| 6  | 3.862471000  | -0.847057000 | -3.331398000 | 1                                       | -2.338229000 | -6.361794000 | -0.174361000 |
| 6  | 3.674676000  | -1.937477000 | -2.269532000 | 1                                       | -1.613792000 | -4.916053000 | 0.611008000  |
| 8  | 4.458642000  | -1.974517000 | -1.322974000 | 6                                       | -4.045080000 | -4.570514000 | -0.719578000 |
| 7  | 1.270975000  | 0.149352000  | 2.890323000  | 1                                       | -4.666082000 | -4.758373000 | -1.606134000 |
| 6  | 0.238803000  | -0.543536000 | 3.485629000  | 1                                       | -4.208063000 | -5.420744000 | -0.039384000 |
| 6  | 0.775496000  | -1.565769000 | 4.336838000  | 6                                       | -4.504202000 | -3.326069000 | 0.030827000  |
| 6  | 2.154821000  | -1.460001000 | 4.277554000  | 1                                       | -5.474029000 | -3.592257000 | 0.492430000  |
| 6  | 2.454273000  | -0.423308000 | 3.341394000  | 1                                       | -3.796661000 | -3.116081000 | 0.838177000  |
| 6  | 3.731832000  | -0.206227000 | 2.781630000  | 6                                       | 1.727594000  | -2.849855000 | -3.522223000 |
| 6  | 4.860487000  | -1.017079000 | 3.326960000  | 6                                       | 0.870342000  | -1.584152000 | -3.623053000 |
| 6  | 5.380685000  | -2.084773000 | 2.574845000  | 1                                       | 2.239046000  | -3.057468000 | -4.475880000 |
| 6  | 6.417049000  | -2.871886000 | 3.083202000  | 1                                       | 1.033850000  | -3.679264000 | -3.359464000 |
| 6  | 6.946128000  | -2.605154000 | 4.350810000  | 1                                       | 1.182365000  | -0.936518000 | -4.457333000 |
| 6  | 6.430984000  | -1.548158000 | 5.107971000  | 1                                       | 0.946331000  | -0.989404000 | -2.699506000 |
| 6  | 5.392690000  | -0.761453000 | 4.599767000  | 6                                       | -1.299749000 | -1.015478000 | -4.460666000 |
| 7  | 2.992112000  | 1.295198000  | 0.961854000  | 1                                       | -0.920440000 | -0.808223000 | -5.478625000 |
| 6  | 3.960621000  | 0.573278000  | 1.653863000  | 6                                       | -2.704432000 | -1.558318000 | -4.566274000 |
| 6  | 5.216102000  | 0.662689000  | 0.943427000  | 1                                       | -1.253037000 | -0.068789000 | -3.901246000 |
| 6  | 4.976757000  | 1.361285000  | -0.205248000 | 1                                       | -3.321072000 | -0.857211000 | -5.160810000 |
| 6  | 3.583930000  | 1.754964000  | -0.180750000 | 1                                       | -2.673683000 | -2.521591000 | -5.104565000 |
| 8  | -5.430458000 | 0.048022000  | -0.739799000 | 6                                       | -5.313062000 | -2.253620000 | -2.095376000 |
| 1  | 4.957459000  | -2.294146000 | 1.590034000  | 1                                       | -6.093968000 | -3.031525000 | -2.044307000 |
| 1  | 0.196726000  | -2.282742000 | 4.910651000  | 1                                       | -5.815381000 | -1.303988000 | -2.301140000 |
| 1  | 2.889010000  | -2.067794000 | 4.800713000  | 6                                       | -4.387161000 | -2.583989000 | -3.261707000 |
| 1  | -3.507088000 | 1.286516000  | 3.850658000  | 1                                       | -4.986634000 | -2.449681000 | -4.181031000 |
| 1  | -3.342760000 | 3.805388000  | 2.922876000  | 1                                       | -4.047987000 | -3.632386000 | -3.255744000 |
| 1  | -0.404569000 | 5.764768000  | -1.141291000 | 8                                       | -1.645346000 | -4.582296000 | -3.850148000 |
| 1  | 1.645630000  | 4.745040000  | -2.563015000 | 1                                       | -1.178702000 | -3.726809000 | -3.877561000 |
| 1  | 5.679676000  | 1.616087000  | -0.994814000 | 1                                       | -2.074761000 | -4.583622000 | -2.975788000 |
| 1  | 6.153594000  | 0.223809000  | 1.274668000  | 6                                       | 0.813954000  | 0.201270000  | -0.027238000 |
| 1  | -1.438332000 | -1.043096000 | 5.921553000  | 8                                       | 1.107772000  | -0.992636000 | 0.126762000  |
| 1  | -3.230458000 | -2.453323000 | 6.888585000  | 8                                       | 0.345552000  | 0.612827000  | -1.153147000 |
| 1  | -5.078804000 | -3.295544000 | 5.420850000  | 6                                       | -3.489170000 | 1.471384000  | -2.876126000 |
| 1  | -5.087990000 | -2.713404000 | 3.004081000  | 1                                       | -3.719622000 | 2.540043000  | -2.958699000 |
| 1  | -0.068462000 | 6.636555000  | 1.510424000  | 1                                       | -4.387080000 | 0.880910000  | -2.674414000 |
| 1  | -1.294744000 | 8.791748000  | 1.563980000  | 1                                       | -3.062727000 | 1.161464000  | -3.841265000 |
| 1  | -3.775858000 | 8.829247000  | 1.271055000  | 6                                       | -2.449042000 | 1.225721000  | -1.806351000 |
| 1  | -5.004144000 | 6.682283000  | 0.925189000  | 8                                       | -2.522654000 | 0.294841000  | -1.011279000 |
| 1  | -3.779450000 | 4.536509000  | 0.866790000  | 8                                       | -1.423040000 | 2.047815000  | -1.820941000 |
| 1  | 4.000027000  | 4.820308000  | -2.326849000 | 1                                       | -0.502873000 | 1.462879000  | -1.311072000 |
| 1  | 5.131283000  | 5.015615000  | -4.532288000 | 8                                       | -2.949378000 | 4.358694000  | -1.824915000 |
| 1  | 5.462739000  | 2.967728000  | -5.933744000 | 1                                       | -2.796974000 | 5.032604000  | -1.147397000 |
| 1  | 4.652443000  | 0.774768000  | -5.132497000 | 1                                       | -2.187121000 | 3.747010000  | -1.747961000 |
| 1  | 6.810732000  | -3.700214000 | 2.488789000  | 8                                       | -0.900008000 | -3.055319000 | 1.540245000  |
| 1  | 7.756663000  | -3.220895000 | 4.748185000  | 1                                       | -1.044907000 | -2.188420000 | 1.947232000  |
| 1  | 6.839797000  | -1.333794000 | 6.098514000  | 1                                       | 0.079477000  | -3.166371000 | 1.588635000  |
| 1  | 4.987993000  | 0.062520000  | 5.191999000  | 8                                       | -4.820106000 | 2.792938000  | -0.197879000 |
| 1  | -5.250058000 | -0.693572000 | 1.875791000  | 1                                       | -4.976700000 | 1.868124000  | -0.469498000 |
| 1  | -4.117453000 | 0.506372000  | 1.215025000  | 1                                       | -4.227188000 | 3.193718000  | -0.860342000 |
| 1  | 3.374854000  | -1.067994000 | -4.292677000 | 8                                       | 1.839198000  | -3.007663000 | 1.643759000  |
| 1  | 4.948243000  | -0.786119000 | -3.504086000 | 1                                       | 2.034649000  | -2.730637000 | 2.553950000  |
| 7  | 2.677604000  | -2.848887000 | -2.413704000 | 1                                       | 1.696089000  | -2.150373000 | 1.167168000  |
| 19 | -1.312248000 | -2.091362000 | -1.051371000 | 8                                       | 0.644895000  | 1.764317000  | -3.797504000 |
| 8  | -0.481989000 | -1.989612000 | -3.828489000 | 1                                       | 1.122972000  | 1.310784000  | -3.084223000 |
| 8  | 0.325139000  | -4.602410000 | -1.180155000 | 1                                       | -0.137123000 | 2.090288000  | -3.319449000 |
| 8  | -3.257821000 | -1.732877000 | -3.276317000 |                                         |              |              |              |
| 8  | -2.679701000 | -4.556974000 | -1.137603000 |                                         |              |              |              |
| 6  | 1.644636000  | -5.003247000 | -1.520143000 |                                         |              |              |              |
| 1  | 1.664516000  | -5.451021000 | -2.532402000 |                                         |              |              |              |
| 6  | 2.648707000  | -3.884546000 | -1.367645000 |                                         |              |              |              |
|    |              |              |              | <b><sup>3</sup>IM1 acetate, 6W, K+:</b> |              |              |              |
|    |              |              |              | 6                                       | -2.747956000 | 5.648695000  | 1.136926000  |
|    |              |              |              | 6                                       | -1.348350000 | 5.516850000  | 1.232439000  |
|    |              |              |              | 6                                       | -0.579042000 | 6.688580000  | 1.372639000  |

|    |              |              |              |    |              |              |              |
|----|--------------|--------------|--------------|----|--------------|--------------|--------------|
| 6  | -1.182665000 | 7.946474000  | 1.417183000  | 1  | -5.116397000 | -2.305680000 | 3.220920000  |
| 6  | -2.573032000 | 8.063547000  | 1.318424000  | 1  | 0.505971000  | 6.602925000  | 1.455292000  |
| 6  | -3.349795000 | 6.910227000  | 1.177459000  | 1  | -0.563787000 | 8.839721000  | 1.531973000  |
| 6  | -0.661812000 | 4.195295000  | 1.181227000  | 1  | -3.046849000 | 9.047516000  | 1.349455000  |
| 6  | -1.079489000 | 3.157331000  | 2.025075000  | 1  | -4.436246000 | 6.988359000  | 1.089317000  |
| 7  | -0.480195000 | 1.895312000  | 2.086249000  | 1  | -3.367330000 | 4.761330000  | 1.006646000  |
| 6  | -1.278160000 | 1.114680000  | 2.877755000  | 1  | 4.321124000  | 4.463936000  | -2.464795000 |
| 6  | -2.410342000 | 1.879998000  | 3.334327000  | 1  | 5.353645000  | 4.606203000  | -4.724702000 |
| 6  | -2.251071000 | 3.156803000  | 2.856672000  | 1  | 5.379704000  | 2.581660000  | -6.196584000 |
| 26 | 1.282184000  | 1.391932000  | 1.380184000  | 1  | 4.373167000  | 0.465435000  | -5.411060000 |
| 7  | 1.257720000  | 2.953545000  | 0.191866000  | 1  | 6.634246000  | -4.190111000 | 2.353437000  |
| 6  | 1.994620000  | 3.094374000  | -0.968401000 | 1  | 7.797542000  | -3.666359000 | 4.498762000  |
| 6  | 1.520448000  | 4.235265000  | -1.698941000 | 1  | 7.148565000  | -1.636498000 | 5.795479000  |
| 6  | 0.554070000  | 4.837526000  | -0.925448000 | 1  | 5.347614000  | -0.138913000 | 4.947493000  |
| 6  | 0.368357000  | 4.025807000  | 0.238265000  | 1  | -5.158501000 | -0.260876000 | 2.134704000  |
| 6  | 3.119514000  | 2.308086000  | -1.295030000 | 1  | -3.974877000 | 0.831537000  | 1.381924000  |
| 6  | 3.744150000  | 2.404040000  | -2.640720000 | 1  | 2.950082000  | -1.288818000 | -4.513439000 |
| 6  | 3.783257000  | 1.265373000  | -3.485654000 | 1  | 4.597845000  | -1.149819000 | -3.849203000 |
| 6  | 4.366957000  | 1.336783000  | -4.756147000 | 7  | 2.265830000  | -3.036889000 | -2.591650000 |
| 6  | 4.928168000  | 2.538367000  | -5.202609000 | 19 | -1.626011000 | -1.952904000 | -1.033611000 |
| 6  | 4.908129000  | 3.668593000  | -4.385233000 | 8  | -0.903318000 | -1.979658000 | -3.842972000 |
| 6  | 4.321095000  | 3.589194000  | -3.118067000 | 8  | -0.124473000 | -4.589485000 | -1.184971000 |
| 6  | -0.956588000 | -0.172403000 | 3.369896000  | 8  | -3.610011000 | -1.531568000 | -3.109279000 |
| 6  | -2.054497000 | -0.953114000 | 3.992991000  | 8  | -3.116993000 | -4.337160000 | -0.960964000 |
| 6  | -2.039262000 | -1.322712000 | 5.352561000  | 6  | 1.134337000  | -5.097284000 | -1.601105000 |
| 6  | -3.088873000 | -2.028250000 | 5.941823000  | 1  | 1.054842000  | -5.559047000 | -2.604103000 |
| 6  | -4.202686000 | -2.382452000 | 5.175662000  | 6  | 2.228957000  | -4.058453000 | -4.532980000 |
| 6  | -4.253410000 | -2.025162000 | 3.826794000  | 1  | 1.437022000  | -5.905696000 | -0.909836000 |
| 6  | -3.198671000 | -1.316898000 | 3.239564000  | 1  | 3.190796000  | -4.595749000 | -1.552410000 |
| 8  | -3.237068000 | -1.021314000 | 1.891944000  | 1  | 2.175673000  | -3.565738000 | -0.555423000 |
| 6  | -4.309402000 | -0.213142000 | 1.431413000  | 6  | -1.055150000 | -5.640066000 | -0.981029000 |
| 6  | -4.889560000 | -0.497223000 | 0.046972000  | 1  | -1.361301000 | -6.070285000 | -1.951262000 |
| 7  | -4.891743000 | -1.744397000 | -0.530276000 | 1  | -0.575324000 | -6.444920000 | -0.392017000 |
| 8  | 3.196594000  | 0.128142000  | -3.006688000 | 6  | -2.264584000 | -5.198331000 | -0.192483000 |
| 6  | 3.527847000  | -1.122476000 | -3.592491000 | 1  | -2.825731000 | -6.110705000 | 0.072920000  |
| 6  | 3.335239000  | -2.201580000 | -2.520689000 | 1  | -1.951347000 | -4.682856000 | 0.728643000  |
| 8  | 4.178852000  | -2.297135000 | -1.631900000 | 6  | -4.452552000 | -4.247660000 | -0.465346000 |
| 7  | 1.454621000  | 0.065899000  | 2.855275000  | 1  | -5.134484000 | -4.398611000 | -1.313070000 |
| 6  | 0.404630000  | -0.568459000 | 3.484847000  | 1  | -4.637014000 | -5.076740000 | 0.235513000  |
| 6  | 0.914090000  | -1.626300000 | 4.311382000  | 6  | -4.775692000 | -2.963393000 | 0.288487000  |
| 6  | 2.293354000  | -1.596549000 | 4.205684000  | 1  | -5.739890000 | -3.146706000 | 0.799760000  |
| 6  | 2.619617000  | -0.575561000 | 3.260848000  | 1  | -4.015214000 | -2.801949000 | 1.057609000  |
| 6  | 3.885700000  | -0.432374000 | 2.659003000  | 6  | 1.256649000  | -2.985453000 | -3.645396000 |
| 6  | 4.983320000  | -1.307656000 | 3.169616000  | 6  | 0.481477000  | -1.665940000 | -3.720091000 |
| 6  | 5.351319000  | -2.455768000 | 2.448272000  | 1  | 1.697739000  | -3.239014000 | -4.622684000 |
| 6  | 6.358731000  | -3.299144000 | 2.923124000  | 1  | 0.517866000  | -3.762565000 | -3.430960000 |
| 6  | 7.009401000  | -3.007094000 | 4.127069000  | 1  | 0.789392000  | -1.052666000 | -4.581894000 |
| 6  | 6.644701000  | -1.869660000 | 4.854239000  | 1  | 0.653764000  | -1.067216000 | -2.812668000 |
| 6  | 5.635175000  | -1.026407000 | 4.378999000  | 6  | -1.689806000 | -0.944566000 | -4.417631000 |
| 7  | 3.179196000  | 1.112359000  | 0.863299000  | 1  | -1.363595000 | -0.757622000 | -5.457731000 |
| 6  | 4.122204000  | 0.325710000  | 1.516576000  | 6  | -3.134113000 | -1.382751000 | -4.432677000 |
| 6  | 5.334964000  | 0.293162000  | 0.733418000  | 1  | -1.540330000 | -0.009572000 | -3.857409000 |
| 6  | 5.083672000  | 0.978435000  | -0.423289000 | 1  | -3.734269000 | -0.629305000 | -4.976977000 |
| 6  | 3.732505000  | 1.485572000  | -0.330690000 | 1  | -3.211902000 | -2.339726000 | -4.978063000 |
| 8  | -5.447580000 | 0.467963000  | -0.479144000 | 6  | -5.622747000 | -1.850990000 | -1.798321000 |
| 1  | 4.829053000  | -2.683910000 | 1.516763000  | 1  | -6.464349000 | -2.555053000 | -1.680773000 |
| 1  | 0.316722000  | -2.312277000 | 4.903532000  | 1  | -6.050581000 | -0.862011000 | -1.987258000 |
| 1  | 3.010795000  | -2.244710000 | 4.703212000  | 6  | -4.808742000 | -2.275675000 | -3.017153000 |
| 1  | -3.187143000 | 1.509797000  | 3.998842000  | 1  | -5.449085000 | -2.092410000 | -3.899440000 |
| 1  | -2.892760000 | 4.010612000  | 3.048230000  | 1  | -4.566753000 | -3.350823000 | -3.019460000 |
| 1  | -0.016758000 | 5.730239000  | -1.166276000 | 8  | -2.256181000 | -4.481126000 | -3.731673000 |
| 1  | 1.881746000  | 4.551008000  | -2.672821000 | 1  | -1.734045000 | -3.661584000 | -3.806977000 |
| 1  | 5.754235000  | 1.150014000  | -1.261964000 | 1  | -2.627165000 | -4.438648000 | -2.832065000 |
| 1  | 6.251052000  | -0.215362000 | 1.022851000  | 6  | 0.954995000  | 0.081841000  | 0.015269000  |
| 1  | -1.190866000 | -1.013716000 | 5.964591000  | 8  | 1.344640000  | -1.077042000 | 0.079492000  |
| 1  | -3.042858000 | -2.287355000 | 7.002000000  | 8  | 0.292849000  | 0.432360000  | -1.077299000 |
| 1  | -5.031768000 | -2.936418000 | 5.621564000  | 6  | -3.480383000 | 1.688708000  | -2.775110000 |











|    |              |              |              |   |              |              |              |
|----|--------------|--------------|--------------|---|--------------|--------------|--------------|
| 6  | -2.086891000 | -1.049902000 | 5.332646000  | 6 | 0.797127000  | -5.238128000 | -1.427821000 |
| 6  | -3.164757000 | -1.677317000 | 5.955837000  | 1 | 0.688266000  | -5.718853000 | -2.419086000 |
| 6  | -4.299776000 | -2.008325000 | 5.210269000  | 6 | 1.959317000  | -4.272919000 | -1.385832000 |
| 6  | -4.346589000 | -1.698579000 | 3.849931000  | 1 | 1.043735000  | -6.046818000 | -0.714910000 |
| 6  | -3.266652000 | -1.060736000 | 3.228486000  | 1 | 2.882395000  | -4.874500000 | -1.392993000 |
| 8  | -3.309223000 | -0.803690000 | 1.873715000  | 1 | 1.944096000  | -3.753131000 | -0.420708000 |
| 6  | -4.350523000 | 0.053204000  | 1.424051000  | 6 | -1.433011000 | -5.616844000 | -0.825630000 |
| 6  | -4.955117000 | -0.213333000 | 0.048321000  | 1 | -1.755817000 | -6.036282000 | -1.795151000 |
| 7  | -5.037835000 | -1.467407000 | -0.504743000 | 1 | -1.019229000 | -6.445925000 | -0.220380000 |
| 8  | 3.180205000  | -0.209171000 | -3.016786000 | 6 | -2.619477000 | -5.081606000 | -0.058877000 |
| 6  | 3.443202000  | -1.501020000 | -3.548229000 | 1 | -3.249075000 | -5.948691000 | 0.203965000  |
| 6  | 3.187723000  | -2.527681000 | -2.438263000 | 1 | -2.282128000 | -4.583024000 | 0.863099000  |
| 8  | 4.033365000  | -2.655329000 | -1.555115000 | 6 | -4.737663000 | -3.991534000 | -0.388895000 |
| 7  | 1.459573000  | 0.066919000  | 2.819876000  | 1 | -5.405148000 | -4.118293000 | -1.252114000 |
| 6  | 0.366365000  | -0.505036000 | 3.459854000  | 1 | -4.987543000 | -4.795527000 | 0.320628000  |
| 6  | 0.812710000  | -1.555573000 | 4.313063000  | 6 | -5.006975000 | -2.677152000 | 0.334645000  |
| 6  | 2.201258000  | -1.588907000 | 4.224355000  | 1 | -5.991519000 | -2.797620000 | 0.825326000  |
| 6  | 2.578993000  | -0.607824000 | 3.260264000  | 1 | -4.257305000 | -2.545330000 | 1.119433000  |
| 6  | 3.870940000  | -0.532781000 | 2.663161000  | 6 | 1.034404000  | -3.174921000 | -3.505134000 |
| 6  | 4.917852000  | -1.434144000 | 3.218693000  | 6 | 0.358675000  | -1.802663000 | -3.576613000 |
| 6  | 5.293337000  | -2.591725000 | 2.513709000  | 1 | 1.431472000  | -3.471301000 | -4.489175000 |
| 6  | 6.247035000  | -3.466427000 | 3.039353000  | 1 | 0.246099000  | -3.892780000 | -3.262830000 |
| 6  | 6.839255000  | -3.198750000 | 4.278735000  | 1 | 0.723473000  | -1.202012000 | -4.424066000 |
| 6  | 6.467316000  | -2.053993000 | 4.990932000  | 1 | 0.557819000  | -1.228189000 | -2.658135000 |
| 6  | 5.510175000  | -1.180445000 | 4.465903000  | 6 | -1.739959000 | -0.950147000 | -4.354836000 |
| 7  | 3.231634000  | 0.940181000  | 0.781557000  | 1 | -1.379278000 | -0.825686000 | -5.392745000 |
| 6  | 4.141104000  | 0.148707000  | 1.467391000  | 6 | -3.210863000 | -1.285440000 | -4.386670000 |
| 6  | 5.343939000  | 0.026290000  | 0.689420000  | 1 | -1.534542000 | -0.007328000 | -3.826531000 |
| 6  | 5.116283000  | 0.665907000  | -0.508288000 | 1 | -3.745238000 | -0.517240000 | -4.978021000 |
| 6  | 3.804835000  | 1.235363000  | -0.436702000 | 1 | -3.343893000 | -2.256759000 | -4.894762000 |
| 8  | -5.451395000 | 0.777312000  | -0.493501000 | 6 | -5.762279000 | -1.550652000 | -1.777564000 |
| 1  | 4.815897000  | -2.803938000 | 1.554834000  | 1 | -6.638469000 | -2.210964000 | -1.660323000 |
| 1  | 0.181406000  | -2.199987000 | 4.916443000  | 1 | -6.138901000 | -0.544201000 | -1.982769000 |
| 1  | 2.882697000  | -2.254311000 | 4.748303000  | 6 | -4.957062000 | -2.029996000 | -2.980780000 |
| 1  | -3.061074000 | 1.808989000  | 3.943450000  | 1 | -5.579748000 | -1.831073000 | -3.872728000 |
| 1  | -2.609620000 | 4.280523000  | 2.948654000  | 1 | -4.765246000 | -3.115380000 | -2.964250000 |
| 1  | 0.316203000  | 5.690774000  | -1.382477000 | 8 | -2.541515000 | -4.424635000 | -3.601422000 |
| 1  | 2.089861000  | 4.317506000  | -2.889657000 | 1 | -1.972142000 | -3.637748000 | -3.685420000 |
| 1  | 5.793877000  | 0.767113000  | -1.352900000 | 1 | -2.914252000 | -4.344326000 | -2.704952000 |
| 1  | 6.239590000  | -0.504699000 | 1.000495000  | 6 | 0.912252000  | 0.028565000  | -0.016909000 |
| 1  | -1.218342000 | -0.759782000 | 5.924382000  | 8 | 1.209618000  | -1.157964000 | 0.121479000  |
| 1  | -3.123000000 | -1.895773000 | 7.025155000  | 8 | 0.292475000  | 0.438311000  | -1.070321000 |
| 1  | -5.149519000 | -2.506595000 | 5.682050000  | 6 | -3.390501000 | 1.896155000  | -2.737150000 |
| 1  | -5.227899000 | -1.960061000 | 3.262558000  | 1 | -3.494653000 | 2.986900000  | -2.777686000 |
| 1  | 1.036061000  | 6.609764000  | 1.136643000  | 1 | -4.348431000 | 1.410110000  | -2.531712000 |
| 1  | 0.181652000  | 8.932600000  | 1.186026000  | 1 | -3.022947000 | 1.574347000  | -3.722959000 |
| 1  | -2.281000000 | 9.366768000  | 1.177118000  | 6 | -2.369864000 | 1.492300000  | -1.695820000 |
| 1  | -3.864608000 | 7.435522000  | 1.109346000  | 8 | -2.572880000 | 0.582172000  | -0.897779000 |
| 1  | -3.013902000 | 5.121593000  | 1.049805000  | 8 | -1.230238000 | 2.141502000  | -1.731795000 |
| 1  | 4.497824000  | 4.096976000  | -2.707634000 | 1 | -0.388704000 | 1.401100000  | -1.214079000 |
| 1  | 5.534893000  | 4.069828000  | -4.969841000 | 8 | -2.412571000 | 4.647596000  | -1.684936000 |
| 1  | 5.463319000  | 1.970811000  | -6.331441000 | 1 | -2.113239000 | 5.315376000  | -1.051677000 |
| 1  | 4.364490000  | -0.051839000 | -5.436384000 | 1 | -1.734096000 | 3.940515000  | -1.645658000 |
| 1  | 6.525464000  | -4.364272000 | 2.481846000  | 8 | -1.088178000 | -2.890859000 | 1.624439000  |
| 1  | 7.585953000  | -3.882516000 | 4.689676000  | 1 | -1.084411000 | -2.053537000 | 2.110501000  |
| 1  | 6.924795000  | -1.839217000 | 5.959907000  | 1 | -0.136700000 | -3.151469000 | 1.632061000  |
| 1  | 5.216281000  | -0.288706000 | 5.024511000  | 8 | -4.432657000 | 3.420804000  | 0.017442000  |
| 1  | -5.192312000 | 0.042754000  | 2.137298000  | 1 | -4.720661000 | 2.527360000  | -0.250003000 |
| 1  | -3.969146000 | 1.081839000  | 1.373067000  | 1 | -3.780534000 | 3.722579000  | -0.642919000 |
| 1  | 2.859594000  | -1.672535000 | -4.464644000 | 8 | 1.648979000  | -3.231543000 | 1.690953000  |
| 1  | 4.510905000  | -1.597213000 | -3.797013000 | 1 | 1.865077000  | -2.942902000 | 2.594203000  |
| 7  | 2.061842000  | -3.287019000 | -2.474267000 | 1 | 1.627298000  | -2.382826000 | 1.184262000  |
| 19 | -1.729084000 | -1.923582000 | -0.895911000 | 8 | 0.598503000  | 1.499585000  | -3.834483000 |
| 8  | -1.043199000 | -2.015911000 | -3.724934000 | 1 | 1.093419000  | 0.985794000  | -3.177225000 |
| 8  | -0.426934000 | -4.637441000 | -1.029763000 | 1 | -0.056972000 | 1.948733000  | -3.271090000 |
| 8  | -3.724531000 | -1.343641000 | -3.070675000 |   |              |              |              |
| 8  | -3.396678000 | -4.166570000 | -0.846759000 |   |              |              |              |

<sup>5</sup>IM1 acetate, 6W, K+:

|    |              |              |              |    |              |              |              |
|----|--------------|--------------|--------------|----|--------------|--------------|--------------|
| 6  | -2.236893000 | 5.927762000  | 1.198351000  | 1  | -1.081467000 | -0.861501000 | 5.946676000  |
| 6  | -0.850072000 | 5.654621000  | 1.172671000  | 1  | -2.985848000 | -1.988399000 | 7.056353000  |
| 6  | 0.033842000  | 6.757107000  | 1.180172000  | 1  | -5.049519000 | -2.526093000 | 5.738947000  |
| 6  | -0.440502000 | 8.067279000  | 1.225702000  | 1  | -5.162764000 | -1.923442000 | 3.335615000  |
| 6  | -1.817354000 | 8.319379000  | 1.253969000  | 1  | 1.109113000  | 6.570866000  | 1.162601000  |
| 6  | -2.708596000 | 7.242519000  | 1.235660000  | 1  | 0.269120000  | 8.898269000  | 1.242206000  |
| 6  | -0.300947000 | 4.282800000  | 1.116088000  | 1  | -2.190632000 | 9.345622000  | 1.285223000  |
| 6  | -0.800639000 | 3.265880000  | 1.973785000  | 1  | -3.786373000 | 7.423900000  | 1.239826000  |
| 7  | -0.297207000 | 1.967650000  | 2.021332000  | 1  | -2.950904000 | 5.105954000  | 1.152142000  |
| 6  | -1.128798000 | 1.249539000  | 2.847004000  | 1  | 4.533850000  | 4.074275000  | -2.714080000 |
| 6  | -2.164502000 | 2.081638000  | 3.340799000  | 1  | 5.513525000  | 4.081334000  | -5.003424000 |
| 6  | -1.931411000 | 3.356323000  | 2.834110000  | 1  | 5.339920000  | 2.027129000  | -6.422220000 |
| 26 | 1.441850000  | 1.353908000  | 1.317084000  | 1  | 4.198755000  | 0.014015000  | -5.558130000 |
| 7  | 1.487730000  | 2.886972000  | 0.079938000  | 1  | 6.536447000  | -4.467512000 | 2.329677000  |
| 6  | 2.167995000  | 2.918919000  | -1.135808000 | 1  | 7.682997000  | -3.994268000 | 4.495827000  |
| 6  | 1.739601000  | 4.046346000  | -1.887907000 | 1  | 7.100237000  | -1.936384000 | 5.780489000  |
| 6  | 0.850947000  | 4.749564000  | -1.088636000 | 1  | 5.383932000  | -0.361952000 | 4.900375000  |
| 6  | 0.681177000  | 4.002719000  | 0.114484000  | 1  | -5.100388000 | 0.106766000  | 2.246841000  |
| 6  | 3.228675000  | 2.045550000  | -1.456538000 | 1  | -3.876350000 | 1.117819000  | 1.447043000  |
| 6  | 3.806312000  | 2.057006000  | -2.824453000 | 1  | 2.686505000  | -1.613525000 | -4.568856000 |
| 6  | 3.731567000  | 0.898283000  | -3.636061000 | 1  | 4.359016000  | -1.568781000 | -3.954433000 |
| 6  | 4.278967000  | 0.897121000  | -4.924577000 | 7  | 1.936569000  | -3.251441000 | -2.577681000 |
| 6  | 4.916657000  | 2.041506000  | -5.415156000 | 19 | -1.803014000 | -1.868932000 | -0.908895000 |
| 6  | 5.007907000  | 3.189462000  | -4.627507000 | 8  | -1.189246000 | -1.974536000 | -3.751523000 |
| 6  | 4.451971000  | 3.187250000  | -3.344753000 | 8  | -0.508093000 | -4.598421000 | -1.063597000 |
| 6  | -0.867316000 | -0.068764000 | 3.350562000  | 8  | -3.844880000 | -1.343212000 | -3.014684000 |
| 6  | -1.997584000 | -0.771950000 | 3.998842000  | 8  | -3.472995000 | -4.120695000 | -0.793421000 |
| 6  | -1.965254000 | -1.122956000 | 5.364348000  | 6  | 0.692233000  | -5.208129000 | -1.514288000 |
| 6  | -3.043307000 | -1.744185000 | 5.993389000  | 1  | 0.540462000  | -5.676960000 | -2.505608000 |
| 6  | -4.198593000 | -2.034434000 | 5.262394000  | 6  | 1.867182000  | -4.257948000 | -1.505658000 |
| 6  | -4.264919000 | -1.692816000 | 3.910380000  | 1  | 0.957171000  | -6.027545000 | -0.820371000 |
| 6  | -3.184189000 | -1.063414000 | 3.281845000  | 1  | 2.780997000  | -4.871339000 | -1.562878000 |
| 8  | -3.243227000 | -0.778388000 | 1.933977000  | 1  | 1.901709000  | -3.755584000 | -0.532127000 |
| 6  | -4.279294000 | 0.098835000  | 1.509895000  | 6  | -1.510997000 | -5.571309000 | -0.817604000 |
| 6  | -4.929975000 | -0.151564000 | 0.151002000  | 1  | -1.866924000 | -5.998586000 | -1.772037000 |
| 7  | -5.055756000 | -1.404741000 | -0.401481000 | 1  | -1.080653000 | -6.396458000 | -0.218422000 |
| 8  | 3.072197000  | -0.176104000 | -3.111400000 | 6  | -2.670269000 | -5.024059000 | -0.018772000 |
| 6  | 3.301412000  | -1.463829000 | -3.669594000 | 1  | -3.291036000 | -5.886586000 | 0.278181000  |
| 6  | 3.070579000  | -2.502829000 | -2.566446000 | 1  | -2.300597000 | -4.513226000 | 0.883934000  |
| 8  | 3.941605000  | -2.649596000 | -1.711754000 | 6  | -4.795131000 | -3.932526000 | -0.289581000 |
| 7  | 1.547567000  | 0.022354000  | 2.809559000  | 1  | -5.493432000 | -4.054704000 | -1.128553000 |
| 6  | 0.464767000  | -0.551372000 | 3.467391000  | 1  | -5.027959000 | -4.732439000 | 0.430526000  |
| 6  | 0.923222000  | -1.617657000 | 4.292571000  | 6  | -5.024719000 | -2.613351000 | 0.438423000  |
| 6  | 2.309397000  | -1.660724000 | 4.168871000  | 1  | -5.997551000 | -2.717275000 | 0.955871000  |
| 6  | 2.671551000  | -0.668739000 | 3.211085000  | 1  | -4.251424000 | -2.493882000 | 1.201582000  |
| 6  | 3.952663000  | -0.592931000 | 2.588798000  | 6  | 0.890942000  | -3.135737000 | -3.590200000 |
| 6  | 5.003511000  | -1.509587000 | 3.111401000  | 6  | 0.215829000  | -1.761474000 | -3.655376000 |
| 6  | 5.334378000  | -2.675398000 | 2.398198000  | 1  | 1.268376000  | -3.436184000 | -4.580762000 |
| 6  | 6.292379000  | -3.563348000 | 2.892977000  | 1  | 0.104284000  | -3.849787000 | -3.331764000 |
| 6  | 6.932871000  | -3.300262000 | 4.109039000  | 1  | 0.552248000  | -1.172894000 | -4.523267000 |
| 6  | 6.604976000  | -2.147215000 | 4.829419000  | 1  | 0.449692000  | -1.176984000 | -2.752314000 |
| 6  | 5.643520000  | -1.260334000 | 4.335465000  | 6  | -1.915883000 | -0.912977000 | -4.356766000 |
| 7  | 3.293974000  | 0.917828000  | 0.744796000  | 1  | -1.583509000 | -0.777936000 | -5.402665000 |
| 6  | 4.204643000  | 0.101433000  | 1.394966000  | 6  | -3.381457000 | -1.271902000 | -4.349095000 |
| 6  | 5.381884000  | -0.036267000 | 0.582591000  | 1  | -1.716590000 | 0.029706000  | -3.825379000 |
| 6  | 5.132144000  | 0.620387000  | -0.603195000 | 1  | -3.944565000 | -0.505348000 | -4.914794000 |
| 6  | 3.834920000  | 1.210601000  | -0.487960000 | 1  | -3.520259000 | -2.242832000 | -4.856167000 |
| 8  | -5.424950000 | 0.848623000  | -0.370829000 | 6  | -5.831606000 | -1.472993000 | -1.644893000 |
| 1  | 4.818195000  | -2.883986000 | 1.458886000  | 1  | -6.727742000 | -2.097660000 | -1.486860000 |
| 1  | 0.301893000  | -2.265797000 | 4.902148000  | 1  | -6.174655000 | -0.453593000 | -1.846015000 |
| 1  | 2.998467000  | -2.337867000 | 4.667134000  | 6  | -5.092155000 | -1.991817000 | -2.874493000 |
| 1  | -2.939749000 | 1.776751000  | 4.039508000  | 1  | -5.741618000 | -1.781013000 | -3.744148000 |
| 1  | -2.509595000 | 4.250356000  | 3.039473000  | 1  | -4.932310000 | -3.082139000 | -2.854902000 |
| 1  | 0.323515000  | 5.664464000  | -1.343789000 | 8  | -2.686421000 | -4.386974000 | -3.568767000 |
| 1  | 2.070663000  | 4.298800000  | -2.890684000 | 1  | -2.119489000 | -3.600922000 | -3.672450000 |
| 1  | 5.785501000  | 0.715368000  | -1.467355000 | 1  | -3.038255000 | -4.299282000 | -2.664535000 |
| 1  | 6.274987000  | -0.588489000 | 0.862402000  | 6  | 0.969355000  | -0.001685000 | 0.035592000  |



|   |              |              |              |
|---|--------------|--------------|--------------|
| 1 | -5.495563000 | -4.013813000 | 0.370008000  |
| 1 | -4.598032000 | -4.356628000 | 1.843620000  |
| 6 | -4.694474000 | -2.282935000 | 1.432044000  |
| 1 | -5.500233000 | -2.266530000 | 2.189771000  |
| 1 | -3.755191000 | -2.023565000 | 1.923628000  |
| 6 | 0.183240000  | -3.425942000 | -4.372252000 |
| 6 | -0.986616000 | -2.630690000 | -4.920755000 |
| 1 | 0.931153000  | -3.500813000 | -5.182586000 |
| 1 | -0.172470000 | -4.448011000 | -4.198884000 |
| 1 | -1.311664000 | -3.142345000 | -5.845693000 |
| 1 | -0.701559000 | -1.610420000 | -5.215085000 |
| 6 | -3.126317000 | -1.751672000 | -4.516178000 |
| 1 | -3.230346000 | -1.914333000 | -5.602972000 |
| 6 | -4.439449000 | -2.116297000 | -3.878196000 |
| 1 | -2.879797000 | -0.688384000 | -4.355501000 |
| 1 | -5.247687000 | -1.573636000 | -4.403794000 |
| 1 | -4.610416000 | -3.198227000 | -4.007701000 |
| 6 | -5.991062000 | -1.614816000 | -0.616932000 |
| 1 | -6.802407000 | -2.183396000 | -0.131070000 |
| 1 | -6.413425000 | -0.667696000 | -0.965475000 |
| 6 | -5.532994000 | -2.409912000 | -1.827145000 |
| 1 | -6.409473000 | -2.468943000 | -2.497462000 |
| 1 | -5.249944000 | -3.444361000 | -1.583568000 |
| 8 | -3.246822000 | -4.865209000 | -2.657566000 |
| 1 | -2.760430000 | -4.147634000 | -3.100573000 |
| 1 | -3.378115000 | -4.553869000 | -1.744062000 |
| 6 | 1.208876000  | -0.313309000 | 0.094693000  |
| 8 | 1.441601000  | -1.461960000 | 0.413103000  |
| 8 | 0.465593000  | -0.104684000 | -0.990305000 |
| 6 | -3.350751000 | 1.578762000  | -2.586991000 |
| 1 | -4.026664000 | 2.431947000  | -2.728549000 |
| 1 | -3.904792000 | 0.634400000  | -2.609002000 |
| 1 | -2.598239000 | 1.593126000  | -3.391556000 |
| 6 | -2.612767000 | 1.690099000  | -1.288995000 |
| 8 | -2.288369000 | 0.761181000  | -0.581641000 |
| 8 | -2.299316000 | 2.957021000  | -0.974976000 |
| 1 | 0.345287000  | 0.832642000  | -1.298103000 |
| 8 | -4.156508000 | 4.857901000  | -1.728915000 |
| 1 | -3.914091000 | 5.730899000  | -2.066495000 |
| 1 | -3.322736000 | 4.357597000  | -1.672894000 |
| 8 | -1.405669000 | -1.845421000 | 1.421204000  |
| 1 | -1.716987000 | -1.038442000 | 1.860260000  |
| 1 | -0.633029000 | -2.184961000 | 1.917011000  |
| 8 | -5.063319000 | 3.620680000  | 0.647055000  |
| 1 | -5.193069000 | 2.720279000  | 0.291644000  |
| 1 | -4.789458000 | 4.143524000  | -0.129035000 |
| 8 | 0.872592000  | -3.101367000 | 2.444018000  |
| 1 | 1.099790000  | -2.655491000 | 3.277929000  |
| 1 | 1.272975000  | -2.520455000 | 1.759389000  |
| 8 | 0.014478000  | 1.911758000  | -2.602081000 |
| 1 | 0.843186000  | 1.684158000  | -3.070638000 |
| 1 | 0.148523000  | 2.835662000  | -2.333103000 |
| 1 | -1.840277000 | 3.000755000  | -0.102139000 |

UB3LYP data:

<sup>3</sup>CAT<sub>H3O+,K+</sub>:

|    |              |              |              |    |              |              |              |
|----|--------------|--------------|--------------|----|--------------|--------------|--------------|
| 6  | 2.618393000  | 5.223118000  | -1.170136000 | 1  | -3.075149000 | 4.704348000  | 0.525830000  |
| 6  | 1.440087000  | 4.953331000  | -1.895669000 | 1  | -5.959695000 | 0.403783000  | -0.666304000 |
| 6  | 0.906197000  | 5.995542000  | -2.679838000 | 1  | -5.433585000 | -2.002072000 | -1.796818000 |
| 6  | 1.520347000  | 7.250970000  | -2.738519000 | 1  | 3.272277000  | -1.441814000 | -5.016063000 |
| 6  | 2.690564000  | 7.497714000  | -2.012154000 | 1  | 5.448827000  | -2.535164000 | -5.541229000 |
| 6  | 3.236666000  | 6.476196000  | -1.226283000 | 1  | 6.822828000  | -3.491159000 | -3.674358000 |
| 6  | 0.769105000  | 3.619105000  | -1.828416000 | 1  | 6.017309000  | -3.361504000 | -1.354631000 |
| 6  | 1.472804000  | 2.480891000  | -2.289825000 | 1  | -0.005235000 | 5.811720000  | -3.254506000 |
| 7  | 1.022935000  | 1.158314000  | -2.192913000 | 1  | 1.084956000  | 8.039009000  | -3.359487000 |
| 6  | 2.084182000  | 0.363518000  | -2.631128000 | 1  | 3.172604000  | 8.477921000  | -2.057089000 |
| 6  | 3.175360000  | 1.188208000  | -3.030162000 | 1  | 4.146604000  | 6.658044000  | -0.647352000 |
| 6  | 2.786770000  | 2.503865000  | -2.842055000 | 1  | 3.048738000  | 4.434937000  | -0.547211000 |
| 26 | -0.851116000 | 0.544590000  | -1.765819000 | 1  | -5.380086000 | 4.052207000  | -0.793271000 |
| 7  | -1.326374000 | 2.415542000  | -1.196623000 | 1  | -7.261956000 | 4.827099000  | 0.640327000  |
| 6  | -2.469862000 | 2.799603000  | -0.498739000 | 1  | -7.703858000 | 3.687673000  | 2.825060000  |
| 6  | -2.338045000 | 4.158450000  | -0.059187000 | 1  | -6.244800000 | 1.822580000  | 3.566657000  |
| 6  | -1.136797000 | 4.628097000  | -0.541577000 | 1  | -5.377991000 | -5.964897000 | -0.843503000 |
| 6  | -0.509374000 | 3.545702000  | -1.243148000 | 1  | -5.319145000 | -7.034273000 | -3.102068000 |
| 6  | -3.613469000 | 2.004450000  | -0.310934000 | 1  | -4.004252000 | -5.957636000 | -4.935770000 |
| 6  | -4.730466000 | 2.502568000  | 0.545979000  | 1  | -2.771070000 | -3.847436000 | -4.512002000 |
| 6  | -4.998424000 | 1.880488000  | 1.795207000  | 1  | 3.914542000  | -2.899362000 | 1.306513000  |
| 6  | -6.061283000 | 2.303117000  | 2.603744000  | 1  | 5.433375000  | -2.819920000 | 0.403504000  |
| 6  | -6.877180000 | 3.362963000  | 2.187733000  | 1  | -4.391577000 | 0.111666000  | 4.099701000  |
| 6  | -6.627784000 | 4.000822000  | 0.971382000  | 1  | -5.630613000 | -0.374040000 | 2.907097000  |
| 6  | -5.565024000 | 3.566533000  | 0.168274000  | 7  | -2.447271000 | -1.402634000 | 2.643083000  |
| 6  | 2.096101000  | -1.055278000 | -2.618417000 | 19 | 1.818295000  | -0.106328000 | 0.420122000  |
| 6  | 3.394830000  | -1.749713000 | -2.895442000 | 8  | 0.245680000  | 1.002326000  | 2.584381000  |
| 6  | 3.879508000  | -1.860112000 | -4.209112000 | 8  | 0.386032000  | -2.918952000 | 3.156738000  |
| 6  | 5.101710000  | -2.471924000 | -4.507013000 | 8  | 3.014887000  | 1.612951000  | 2.529038000  |
| 6  | 5.867048000  | -3.002737000 | -3.467664000 | 8  | 3.017340000  | -2.124029000 | 4.141561000  |
| 6  | 5.410675000  | -2.923410000 | -2.147992000 | 6  | -0.938295000 | -3.405691000 | 2.998496000  |
| 6  | 4.188326000  | -2.300563000 | -1.858642000 | 1  | -1.458213000 | -3.459920000 | 3.974605000  |
| 8  | 3.664930000  | -2.248609000 | -0.585949000 | 6  | -1.730512000 | -2.524885000 | 2.035346000  |
| 6  | 4.472933000  | -2.309484000 | 0.568827000  | 1  | -0.899631000 | -4.435537000 | 2.592144000  |
| 6  | 4.727967000  | -0.877768000 | 1.081732000  | 1  | -2.486224000 | -3.144437000 | 1.540919000  |
| 7  | 5.036173000  | -0.689315000 | 2.393597000  | 1  | -1.046072000 | -2.148386000 | 1.256143000  |
| 8  | -4.139352000 | 0.886702000  | 2.173564000  | 6  | 1.129912000  | -3.640596000 | 4.118614000  |
| 6  | -4.561977000 | -0.152779000 | 3.040009000  | 1  | 0.853565000  | -3.320594000 | 5.142514000  |
| 6  | -3.814046000 | -1.429727000 | 2.633633000  | 1  | 0.915738000  | -4.724157000 | 4.039105000  |
| 8  | -4.460633000 | -2.409600000 | 2.269752000  | 6  | 2.619179000  | -3.468537000 | 3.906190000  |
| 7  | -0.351643000 | -1.342056000 | -2.235495000 | 1  | 3.144513000  | -4.144282000 | 4.605092000  |
| 6  | 0.936945000  | -1.833818000 | -2.443135000 | 1  | 2.875882000  | -3.780208000 | 2.877067000  |
| 6  | 0.898298000  | -3.259318000 | -2.581410000 | 6  | 4.371477000  | -1.912218000 | 4.505254000  |
| 6  | -0.424091000 | -3.639183000 | -2.517297000 | 1  | 4.388758000  | -0.995056000 | 5.111763000  |
| 6  | -1.199535000 | -2.450186000 | -2.314821000 | 1  | 4.731670000  | -2.734321000 | 5.150180000  |
| 6  | -2.602842000 | -2.425149000 | -2.191857000 | 6  | 5.336856000  | -1.780175000 | 3.322850000  |
| 6  | -3.360626000 | -3.689360000 | -2.438180000 | 1  | 6.346650000  | -1.620821000 | 3.739855000  |
| 6  | -4.112403000 | -4.312330000 | -1.419750000 | 1  | 5.388493000  | -2.727125000 | 2.773010000  |
| 6  | -4.809092000 | -5.501932000 | -1.654868000 | 6  | -1.645640000 | -0.336181000 | 3.241070000  |
| 6  | -4.774715000 | -6.104280000 | -2.917898000 | 6  | -1.124970000 | 0.730916000  | 2.260693000  |
| 6  | -4.035700000 | -5.501894000 | -3.942020000 | 1  | -2.213210000 | 0.138268000  | 4.051301000  |
| 6  | -3.340730000 | -4.311916000 | -3.703144000 | 1  | -0.774970000 | -0.808617000 | 3.715146000  |
| 7  | -2.728871000 | -0.060178000 | -1.404921000 | 1  | -1.714833000 | 1.655210000  | 2.334316000  |
| 6  | -3.314140000 | -1.272042000 | -1.776189000 | 1  | -1.209706000 | 0.383217000  | 1.216878000  |
| 6  | -4.723767000 | -1.212085000 | -1.563468000 | 6  | 0.711449000  | 2.320885000  | 2.317784000  |
| 6  | -4.992408000 | 0.015621000  | -0.981099000 | 1  | -0.005271000 | 3.067286000  | 2.705383000  |
| 6  | -3.755439000 | 0.712643000  | -0.880573000 | 6  | 2.037969000  | 2.521975000  | 3.020220000  |
| 8  | 4.595849000  | 0.060210000  | 0.298083000  | 1  | 0.800689000  | 2.498558000  | 1.228921000  |
| 1  | -4.148558000 | -3.854194000 | -0.428448000 | 1  | 2.370045000  | 3.567100000  | 2.868035000  |
| 1  | 1.766013000  | -3.896831000 | -2.741729000 | 1  | 1.892456000  | 2.367783000  | 4.103964000  |
| 1  | -0.827230000 | -4.646213000 | -2.596439000 | 6  | 5.270147000  | 0.691461000  | 2.836548000  |
| 1  | 4.127985000  | 0.828315000  | -3.412615000 | 1  | 6.068612000  | 0.674279000  | 3.594683000  |
| 1  | 3.368794000  | 3.398749000  | -3.049223000 | 1  | 5.636904000  | 1.260982000  | 1.925090000  |
| 1  | -0.712657000 | 5.620863000  | -0.408675000 | 6  | 4.082312000  | 1.430168000  | 3.449481000  |
|    |              |              |              | 1  | 4.465702000  | 2.413684000  | 3.783708000  |
|    |              |              |              | 1  | 3.694025000  | 0.908627000  | 4.341726000  |
|    |              |              |              | 8  | 1.293494000  | -0.095115000 | 5.074581000  |

|                                |              |              |              |    |              |              |              |
|--------------------------------|--------------|--------------|--------------|----|--------------|--------------|--------------|
| 1                              | 0.946809000  | 0.290091000  | 4.250098000  | 1  | -1.840707000 | 2.616379000  | -4.772449000 |
| 1                              | 1.838320000  | -0.839812000 | 4.755117000  | 1  | -3.738471000 | 3.281557000  | -2.935129000 |
| <b><sup>3</sup>RC1H3O+,K+:</b> |              |              |              |    |              |              |              |
| 6                              | 1.223132000  | 1.393537000  | -5.534236000 | 1  | -5.883077000 | 0.835548000  | 1.217575000  |
| 6                              | -0.024817000 | 0.750993000  | -5.433097000 | 1  | -5.647999000 | -1.642404000 | 2.241561000  |
| 6                              | -0.830642000 | 0.684885000  | -6.585632000 | 1  | 1.008321000  | -6.154703000 | -2.049407000 |
| 6                              | -0.400465000 | 1.231085000  | -7.798511000 | 1  | 2.930283000  | -7.725667000 | -1.821551000 |
| 6                              | 0.845933000  | 1.862171000  | -7.883793000 | 1  | 5.058283000  | -6.914107000 | -0.777166000 |
| 6                              | 1.655971000  | 1.941810000  | -6.746464000 | 1  | 5.260076000  | -4.583830000 | -0.020072000 |
| 6                              | -0.494510000 | 0.162847000  | -4.138883000 | 1  | -1.804176000 | 0.191314000  | -6.527913000 |
| 6                              | 0.162852000  | -0.942703000 | -3.615880000 | 1  | -1.040266000 | 1.160205000  | -8.682268000 |
| 7                              | -0.142190000 | -1.597093000 | -2.432449000 | 1  | 1.183012000  | 2.290052000  | -8.831488000 |
| 6                              | 0.797882000  | -2.600223000 | -2.300049000 | 1  | 2.629301000  | 2.436940000  | -6.800263000 |
| 6                              | 1.711980000  | -2.581129000 | -3.428324000 | 1  | 1.858830000  | 1.465826000  | -4.648115000 |
| 6                              | 1.305601000  | -1.582764000 | -4.252167000 | 1  | -6.472782000 | 2.005159000  | -1.596740000 |
| 26                             | -1.609431000 | -1.145906000 | -1.113474000 | 1  | -7.784940000 | 4.043467000  | -1.034032000 |
| 7                              | -2.183745000 | 0.387744000  | -2.302370000 | 1  | -6.757195000 | 5.825292000  | 0.391960000  |
| 6                              | -3.103671000 | 1.360652000  | -1.967132000 | 1  | -4.427814000 | 5.556558000  | 1.218139000  |
| 6                              | -3.081445000 | 2.414207000  | -2.928646000 | 1  | -4.819125000 | -3.882597000 | 5.621216000  |
| 6                              | -2.126462000 | 2.605722000  | -3.885127000 | 1  | -5.942078000 | -6.005678000 | 4.935185000  |
| 6                              | -1.576668000 | 0.815832000  | -3.475506000 | 1  | -5.846136000 | -6.734974000 | 2.547643000  |
| 6                              | -3.937368000 | 1.352645000  | -0.812253000 | 1  | -4.641258000 | -5.355949000 | 0.870504000  |
| 6                              | -4.719035000 | 2.591539000  | -0.499762000 | 1  | 4.515903000  | -2.263158000 | 1.317515000  |
| 6                              | -4.166535000 | 3.615537000  | 0.300136000  | 1  | 5.387475000  | -2.593502000 | -0.195953000 |
| 6                              | -4.888008000 | 4.771663000  | 0.614821000  | 1  | -1.898561000 | 4.713669000  | 2.093745000  |
| 6                              | -6.194486000 | 4.922702000  | 0.142078000  | 1  | -3.403038000 | 3.966208000  | 2.674876000  |
| 6                              | -6.766006000 | 3.929144000  | -0.656828000 | 7  | -0.559566000 | 2.600921000  | 3.219984000  |
| 6                              | -6.027521000 | 2.785074000  | -0.974157000 | 19 | 2.300921000  | 1.123201000  | 1.163203000  |
| 6                              | 0.847282000  | -3.555098000 | -1.292448000 | 8  | 1.931762000  | 3.908156000  | 1.657873000  |
| 6                              | 2.030684000  | -4.468738000 | -1.201663000 | 8  | 2.226346000  | 1.062341000  | 3.983927000  |
| 6                              | 1.948860000  | -5.805277000 | -1.616029000 | 8  | 4.182030000  | 2.920255000  | 0.072899000  |
| 6                              | 3.024687000  | -6.690764000 | -1.484614000 | 8  | 5.041341000  | 1.021695000  | 3.060501000  |
| 6                              | 4.210627000  | -6.236483000 | -0.907835000 | 6  | 1.057879000  | 1.289233000  | 4.760564000  |
| 6                              | 4.328512000  | -4.907917000 | -0.483664000 | 1  | 1.177426000  | 2.187281000  | 5.395030000  |
| 6                              | 3.256295000  | -4.016634000 | -0.647007000 | 6  | -0.197113000 | 1.338097000  | 3.914517000  |
| 8                              | 3.303767000  | -2.699648000 | -0.289554000 | 1  | 0.924144000  | 0.438547000  | 5.454733000  |
| 6                              | 4.479695000  | -2.127626000 | 0.224535000  | 1  | -1.038488000 | 1.083988000  | 4.578135000  |
| 6                              | 4.528837000  | -0.647865000 | -0.193036000 | 1  | -0.158239000 | 0.529695000  | 3.167099000  |
| 7                              | 5.539855000  | 0.132006000  | 0.306807000  | 6  | 3.369492000  | 0.839118000  | 4.799865000  |
| 8                              | -2.850240000 | 3.471867000  | 0.732313000  | 1  | 3.731640000  | 1.797395000  | 5.212978000  |
| 6                              | -2.491239000 | 3.792323000  | 2.086421000  | 1  | 3.097893000  | 0.180627000  | 5.645878000  |
| 6                              | -1.823018000 | 2.547621000  | 2.694458000  | 6  | 4.478424000  | 0.148498000  | 4.036193000  |
| 8                              | -2.481605000 | 1.514989000  | 2.709721000  | 1  | 5.255353000  | -0.145984000 | 4.764440000  |
| 7                              | -1.344653000 | -2.964375000 | -0.267289000 | 1  | 4.089136000  | -0.772708000 | 3.564721000  |
| 6                              | -0.204651000 | -3.741220000 | -0.355524000 | 6  | 6.353107000  | 0.704512000  | 2.613600000  |
| 6                              | -0.251648000 | -4.801669000 | 0.597476000  | 1  | 6.829693000  | 1.658403000  | 2.350333000  |
| 6                              | -1.452792000 | -4.680067000 | 1.269232000  | 1  | 6.945341000  | 0.266286000  | 3.436282000  |
| 6                              | -2.108485000 | -3.531203000 | 0.737596000  | 6  | 6.399243000  | -0.263673000 | 1.421533000  |
| 6                              | -3.324157000 | -3.007033000 | 1.258625000  | 1  | 7.449645000  | -0.326925000 | 1.085501000  |
| 6                              | -4.049209000 | -3.827568000 | 2.281067000  | 1  | 6.122364000  | -1.267507000 | 1.759789000  |
| 6                              | -4.110459000 | -3.432847000 | 3.630162000  | 6  | 0.193639000  | 3.851764000  | 3.388086000  |
| 6                              | -4.786482000 | -4.208616000 | 4.578128000  | 6  | 0.736709000  | 4.522313000  | 2.127570000  |
| 6                              | -5.413581000 | -5.398769000 | 4.195451000  | 1  | -0.422906000 | 4.594959000  | 3.918864000  |
| 6                              | -5.357391000 | -5.807543000 | 2.858120000  | 1  | 1.046517000  | 3.653396000  | 4.047766000  |
| 6                              | -4.679972000 | -5.030880000 | 1.913332000  | 1  | 0.950439000  | 5.577580000  | 2.380852000  |
| 7                              | -3.270755000 | -0.884522000 | -0.016643000 | 1  | -0.006465000 | 4.531588000  | 1.314163000  |
| 6                              | -3.823450000 | -1.759811000 | 0.911263000  | 6  | 2.391715000  | 4.501357000  | 0.437557000  |
| 6                              | -5.003958000 | -1.159893000 | 1.510641000  | 1  | 2.210046000  | 5.590211000  | 0.461765000  |
| 6                              | -5.122745000 | 0.090020000  | 0.996617000  | 6  | 3.875947000  | 4.293490000  | 0.258552000  |
| 6                              | -4.059941000 | 0.247487000  | 0.018956000  | 1  | 1.825258000  | 4.083825000  | -0.414756000 |
| 8                              | 3.724447000  | -0.211124000 | -1.008808000 | 1  | 4.199315000  | 4.877671000  | -0.624684000 |
| 1                              | -3.616613000 | -2.507884000 | 3.938285000  | 1  | 4.411041000  | 4.683770000  | 1.142424000  |
| 1                              | 0.516068000  | -5.557354000 | 0.742047000  | 6  | 5.932959000  | 1.306973000  | -0.485768000 |
| 1                              | -1.833237000 | -5.310545000 | 2.069080000  | 1  | 7.030451000  | 1.277117000  | -0.593586000 |
| 1                              | 2.534047000  | -3.278698000 | -3.574332000 | 1  | 5.492414000  | 1.182918000  | -1.483214000 |
| 1                              | 1.730025000  | -1.294944000 | -5.210707000 | 6  | 5.580672000  | 2.701441000  | 0.017942000  |
|                                |              |              |              | 1  | 6.041133000  | 3.409853000  | -0.697910000 |
|                                |              |              |              | 1  | 6.027432000  | 2.915729000  | 1.003731000  |











|                                           |              |              |              |   |              |              |              |
|-------------------------------------------|--------------|--------------|--------------|---|--------------|--------------|--------------|
| 6                                         | -2.190948000 | -3.478144000 | 3.693237000  | 6 | -4.997227000 | 1.848634000  | 1.827536000  |
| 1                                         | -1.261401000 | -5.338171000 | 3.350953000  | 6 | -6.058341000 | 2.265386000  | 2.641448000  |
| 1                                         | -2.788388000 | -3.967099000 | 4.483948000  | 6 | -6.875332000 | 3.327898000  | 2.234728000  |
| 1                                         | -2.766558000 | -3.518945000 | 2.762158000  | 6 | -6.628732000 | 3.974251000  | 1.022136000  |
| 6                                         | 0.504871000  | -4.917755000 | 1.727042000  | 6 | -5.567952000 | 3.545823000  | 0.213559000  |
| 1                                         | 0.948901000  | -5.631167000 | 2.443786000  | 6 | 2.103951000  | -1.036208000 | -2.610233000 |
| 1                                         | -0.226726000 | -5.469124000 | 1.106779000  | 6 | 3.402581000  | -1.728175000 | -2.894602000 |
| 6                                         | 1.598282000  | -4.384542000 | 0.829075000  | 6 | 3.878963000  | -1.838815000 | -4.211341000 |
| 1                                         | 1.993552000  | -5.225960000 | 0.235411000  | 6 | 5.098721000  | -2.451733000 | -4.517094000 |
| 1                                         | 1.196379000  | -3.636282000 | 0.121010000  | 6 | 5.869010000  | -2.985258000 | -3.482850000 |
| 6                                         | 3.963723000  | -3.899196000 | 1.094640000  | 6 | 5.420517000  | -2.906521000 | -2.160440000 |
| 1                                         | 4.636064000  | -4.107377000 | 1.938372000  | 6 | 4.201406000  | -2.280929000 | -1.863043000 |
| 1                                         | 4.037808000  | -4.762972000 | 0.413031000  | 8 | 3.687049000  | -2.228013000 | -0.586727000 |
| 6                                         | 4.422351000  | -2.664063000 | 0.321658000  | 6 | 4.503525000  | -2.288057000 | 0.562324000  |
| 1                                         | 5.415692000  | -2.905163000 | -0.100561000 | 6 | 4.742967000  | -0.856958000 | 1.084381000  |
| 1                                         | 3.754220000  | -2.502524000 | -0.531122000 | 7 | 5.047554000  | -0.672873000 | 2.397798000  |
| 6                                         | -1.611347000 | -1.735753000 | 5.407118000  | 8 | -4.136979000 | 0.852713000  | 2.197448000  |
| 6                                         | -0.414202000 | -0.804567000 | 5.589359000  | 6 | -4.556732000 | -0.193813000 | 3.056484000  |
| 1                                         | -2.441936000 | -1.292164000 | 5.982647000  | 6 | -3.803579000 | -1.465012000 | 2.641866000  |
| 1                                         | -1.381734000 | -2.687985000 | 5.905073000  | 8 | -4.445876000 | -2.446383000 | -2.274641000 |
| 1                                         | -0.374343000 | -0.561808000 | 6.667164000  | 7 | -0.348876000 | -1.337807000 | -2.258190000 |
| 1                                         | -0.553820000 | 0.148281000  | 5.050721000  | 6 | 0.942422000  | -1.824746000 | -2.455316000 |
| 6                                         | 1.916900000  | -0.531910000 | 5.629111000  | 6 | 0.908146000  | -3.244149000 | -2.606498000 |
| 1                                         | 1.839195000  | -0.368659000 | 6.719370000  | 6 | -0.419518000 | -3.625663000 | -2.552108000 |
| 6                                         | 3.265669000  | -1.150126000 | 5.347611000  | 6 | -1.194764000 | -2.442042000 | -2.345231000 |
| 1                                         | 1.843296000  | 0.457286000  | 5.138546000  | 6 | -2.604686000 | -2.418030000 | -2.213878000 |
| 1                                         | 4.028072000  | -0.546781000 | 5.876098000  | 6 | -3.358568000 | -3.679065000 | -2.476670000 |
| 1                                         | 3.304495000  | -2.174775000 | 5.756207000  | 6 | -4.127784000 | -4.308631000 | -1.473941000 |
| 6                                         | 5.345230000  | -1.440672000 | 2.318521000  | 6 | -4.822792000 | -5.495574000 | -1.726384000 |
| 1                                         | 6.216698000  | -2.091830000 | 2.131905000  | 6 | -4.768673000 | -6.092924000 | -2.991087000 |
| 1                                         | 5.711466000  | -0.415762000 | 2.451415000  | 6 | -4.010221000 | -5.486816000 | -3.999299000 |
| 6                                         | 4.716281000  | -1.896502000 | 3.634561000  | 6 | -3.318124000 | -4.299206000 | -3.743706000 |
| 1                                         | 5.485254000  | -1.732544000 | 4.412089000  | 7 | -2.732028000 | -0.066306000 | -1.392212000 |
| 1                                         | 4.480513000  | -2.973012000 | 3.644470000  | 6 | -3.312066000 | -1.276245000 | -1.768864000 |
| 8                                         | 2.213351000  | -4.141290000 | 4.594945000  | 6 | -4.723055000 | -1.221403000 | -1.541395000 |
| 1                                         | 1.674074000  | -3.369604000 | 4.832185000  | 6 | -4.991678000 | -0.004397000 | -0.942769000 |
| 1                                         | 2.355528000  | -4.061629000 | 3.635005000  | 6 | -3.755305000 | 0.700111000  | -0.849793000 |
| 6                                         | 0.672233000  | 1.515662000  | -0.112864000 | 8 | 4.603085000  | 0.083990000  | 0.305639000  |
| 8                                         | 1.331571000  | 2.233348000  | 0.469251000  | 1 | -4.176213000 | -3.858535000 | -0.479460000 |
| 8                                         | -0.574426000 | 0.450547000  | 2.042089000  | 1 | 1.776839000  | -3.879698000 | -2.768222000 |
| 8                                         | -1.301312000 | 2.995145000  | 2.725635000  | 1 | -0.820590000 | -4.632864000 | -4.638983000 |
| 1                                         | -2.210601000 | 2.646664000  | 2.786789000  | 1 | 4.133858000  | 0.851281000  | -3.390350000 |
| 1                                         | -1.376183000 | 0.207536000  | 1.552938000  | 1 | 3.359967000  | 3.415026000  | -3.040400000 |
| 1                                         | -0.713284000 | 1.402204000  | 2.266603000  | 1 | -0.732157000 | 5.619969000  | -0.391625000 |
| 1                                         | -1.348733000 | 3.644739000  | 2.006793000  | 1 | -3.087008000 | 4.690688000  | 0.558561000  |
|                                           |              |              |              | 1 | -5.957786000 | 0.377258000  | -0.617351000 |
|                                           |              |              |              | 1 | -5.433300000 | -2.008739000 | -1.781803000 |
|                                           |              |              |              | 1 | 3.267086000  | -1.419461000 | -5.014245000 |
|                                           |              |              |              | 1 | 5.439807000  | -2.514225000 | -5.553372000 |
|                                           |              |              |              | 1 | 6.822500000  | -3.475539000 | -3.695682000 |
|                                           |              |              |              | 1 | 6.030459000  | -3.347540000 | -1.371228000 |
|                                           |              |              |              | 1 | -0.097451000 | 5.818702000  | -3.215584000 |
|                                           |              |              |              | 1 | 0.960960000  | 8.057666000  | -3.352698000 |
|                                           |              |              |              | 1 | 3.091442000  | 8.518380000  | -2.127842000 |
|                                           |              |              |              | 1 | 4.136949000  | 6.705268000  | -0.760314000 |
|                                           |              |              |              | 1 | 3.068604000  | 4.471937000  | -0.623447000 |
|                                           |              |              |              | 1 | -5.385511000 | 4.038208000  | -0.745004000 |
|                                           |              |              |              | 1 | -7.264037000 | 4.802471000  | 0.698145000  |
|                                           |              |              |              | 1 | -7.700733000 | 3.647979000  | 2.876036000  |
|                                           |              |              |              | 1 | -6.239531000 | 1.777821000  | 3.601272000  |
|                                           |              |              |              | 1 | -5.404877000 | -5.961550000 | -0.926052000 |
|                                           |              |              |              | 1 | -5.311461000 | -7.021105000 | -3.188694000 |
|                                           |              |              |              | 1 | -3.962544000 | -5.937828000 | -4.994656000 |
|                                           |              |              |              | 1 | -2.735023000 | -3.832358000 | -4.541525000 |
|                                           |              |              |              | 1 | 3.959650000  | -2.893038000 | 1.298525000  |
|                                           |              |              |              | 1 | 5.470689000  | -2.781641000 | 0.385549000  |
|                                           |              |              |              | 1 | -4.387945000 | 0.063773000  | 4.118183000  |
| <b><sup>5</sup>CAT<sub>H3O+,K+</sub>:</b> |              |              |              |   |              |              |              |
| 6                                         | 2.607330000  | 5.254455000  | -1.231047000 |   |              |              |              |
| 6                                         | 1.406352000  | 4.969905000  | -1.914534000 |   |              |              |              |
| 6                                         | 0.831995000  | 6.011020000  | -2.673530000 |   |              |              |              |
| 6                                         | 1.428439000  | 7.273376000  | -2.750453000 |   |              |              |              |
| 6                                         | 2.622782000  | 7.532503000  | -2.068089000 |   |              |              |              |
| 6                                         | 3.208784000  | 6.514670000  | -1.306743000 |   |              |              |              |
| 6                                         | 0.753063000  | 3.629798000  | -1.830387000 |   |              |              |              |
| 6                                         | 1.465349000  | 2.493718000  | -2.273509000 |   |              |              |              |
| 7                                         | 1.024865000  | 1.169902000  | -2.175189000 |   |              |              |              |
| 6                                         | 2.088604000  | 0.375937000  | -2.612469000 |   |              |              |              |
| 6                                         | 3.179796000  | 1.207488000  | -3.008442000 |   |              |              |              |
| 6                                         | 2.783529000  | 2.518432000  | -2.825720000 |   |              |              |              |
| 26                                        | -0.855167000 | 0.549934000  | -1.764260000 |   |              |              |              |
| 7                                         | -1.343081000 | 2.424441000  | -1.191829000 |   |              |              |              |
| 6                                         | -2.480663000 | 2.795916000  | -0.478027000 |   |              |              |              |
| 6                                         | -2.353249000 | 4.149970000  | -0.035041000 |   |              |              |              |
| 6                                         | -1.154240000 | 4.626837000  | -0.528145000 |   |              |              |              |
| 6                                         | -0.530433000 | 3.553206000  | -1.238615000 |   |              |              |              |
| 6                                         | -3.617682000 | 1.987042000  | -0.281453000 |   |              |              |              |
| 6                                         | -4.732544000 | 2.478896000  | 0.581598000  |   |              |              |              |

|                      |              |              |              |   |              |              |              |
|----------------------|--------------|--------------|--------------|---|--------------|--------------|--------------|
| 1                    | -5.624540000 | -0.417885000 | 2.921341000  | 6 | -5.036082000 | 1.827727000  | -0.705764000 |
| 7                    | -2.436830000 | -1.430635000 | 2.648052000  | 6 | -4.481407000 | 3.076899000  | -0.347564000 |
| 19                   | 1.827126000  | -0.109369000 | 0.441757000  | 6 | -5.274402000 | 4.222767000  | -0.232298000 |
| 8                    | 0.242972000  | 0.989440000  | 2.600343000  | 6 | -6.653491000 | 4.136334000  | -0.447897000 |
| 8                    | 0.406373000  | -2.934040000 | 3.145550000  | 6 | -7.230132000 | 2.913546000  | -0.792705000 |
| 8                    | 3.008525000  | 1.613682000  | 2.547544000  | 6 | -6.421261000 | 1.780185000  | -0.930892000 |
| 8                    | 3.035380000  | -2.129558000 | 4.132132000  | 6 | 1.129903000  | -3.807547000 | -0.826882000 |
| 6                    | -0.915682000 | -3.427353000 | 2.988214000  | 6 | 2.424007000  | -4.547736000 | -0.667332000 |
| 1                    | -1.432455000 | -3.490111000 | 3.965488000  | 6 | 2.523770000  | -5.923647000 | -0.905685000 |
| 6                    | -1.715732000 | -2.545744000 | 2.032261000  | 6 | 3.717020000  | -6.625152000 | -0.693024000 |
| 1                    | -0.872295000 | -4.454631000 | 2.575892000  | 6 | 4.831873000  | -5.938085000 | -0.213111000 |
| 1                    | -2.469794000 | -3.166778000 | 1.537044000  | 6 | 4.765882000  | -4.561847000 | 0.036984000  |
| 1                    | -1.035570000 | -2.161596000 | 1.252978000  | 6 | 3.575972000  | -3.859497000 | -0.206722000 |
| 6                    | 1.157222000  | -3.657962000 | 4.100323000  | 8 | 3.424807000  | -2.514542000 | -0.023082000 |
| 1                    | 0.880805000  | -3.347762000 | 5.127226000  | 6 | 4.479529000  | -1.707333000 | 0.431447000  |
| 1                    | 0.950083000  | -4.742294000 | 4.012827000  | 6 | 4.386298000  | -0.331341000 | -0.255391000 |
| 6                    | 2.644950000  | -3.474518000 | 3.886363000  | 7 | 5.344670000  | 0.598402000  | 0.065950000  |
| 1                    | 3.175710000  | -4.152758000 | 4.578690000  | 8 | -3.101226000 | 3.145945000  | -0.164954000 |
| 1                    | 2.901625000  | -3.775977000 | 2.854202000  | 6 | -2.531517000 | 3.961708000  | 0.857880000  |
| 6                    | 4.387365000  | -1.912523000 | 4.500885000  | 6 | -1.735972000 | 3.081319000  | 1.841187000  |
| 1                    | 4.397568000  | -0.999654000 | 5.114004000  | 8 | -2.136402000 | 1.950189000  | 2.059938000  |
| 1                    | 4.750753000  | -2.737089000 | 5.140851000  | 7 | -0.982022000 | -3.220393000 | 0.371568000  |
| 6                    | 5.355110000  | -1.766090000 | 3.322052000  | 6 | 0.210926000  | -3.902380000 | 0.266857000  |
| 1                    | 6.362273000  | -1.600237000 | 3.742854000  | 6 | 0.397678000  | -4.719930000 | 1.426535000  |
| 1                    | 5.416532000  | -2.709576000 | 2.767385000  | 6 | -0.702926000 | -4.518120000 | 2.241486000  |
| 6                    | -1.639718000 | -0.363889000 | 3.251506000  | 6 | -1.542687000 | -3.565213000 | 1.579789000  |
| 6                    | -1.126861000 | 0.713151000  | 2.277783000  | 6 | -2.723714000 | -2.979975000 | 2.147353000  |
| 1                    | -2.208061000 | 0.101963000  | 4.066177000  | 6 | -3.199204000 | -3.552165000 | 3.448151000  |
| 1                    | -0.765424000 | -0.834693000 | 3.720521000  | 6 | -3.142775000 | -2.810127000 | 4.642933000  |
| 1                    | -1.721234000 | 1.633835000  | 2.359691000  | 6 | -3.588964000 | -3.353159000 | 5.852665000  |
| 1                    | -1.212351000 | 0.372282000  | 1.231850000  | 6 | -4.098469000 | -4.654954000 | 5.894628000  |
| 6                    | 0.701748000  | 2.311590000  | 2.339397000  | 6 | -4.156348000 | -5.408788000 | 4.716765000  |
| 1                    | -0.018639000 | 3.052474000  | 2.730739000  | 6 | -3.709513000 | -4.863243000 | 3.509686000  |
| 6                    | 2.027494000  | 2.516233000  | 3.042305000  | 7 | -3.130962000 | -1.247868000 | 0.417821000  |
| 1                    | 0.789632000  | 2.494478000  | 1.251256000  | 6 | -3.421319000 | -1.895695000 | 1.603930000  |
| 1                    | 2.354702000  | 3.563470000  | 2.894212000  | 6 | -4.587059000 | -1.263069000 | 2.213872000  |
| 1                    | 1.882797000  | 2.357173000  | 4.125474000  | 6 | -4.949589000 | -0.224491000 | 1.415215000  |
| 6                    | 5.270877000  | 0.707270000  | 2.848293000  | 6 | -4.052075000 | -0.234299000 | 0.266580000  |
| 1                    | 6.069835000  | 0.692083000  | 3.605966000  | 8 | 3.537665000  | -0.121424000 | -1.113562000 |
| 1                    | 5.632813000  | 1.284237000  | 1.987163000  | 1 | -2.737576000 | -1.795386000 | 4.621484000  |
| 6                    | 4.078128000  | 1.433977000  | 3.466054000  | 1 | 1.247289000  | -5.372043000 | 1.615614000  |
| 1                    | 4.454785000  | 2.418565000  | 3.804700000  | 1 | -0.893865000 | -4.968493000 | 3.212862000  |
| 1                    | 3.694423000  | 0.905326000  | 4.356080000  | 1 | 2.673456000  | -3.757192000 | -3.264229000 |
| 8                    | 1.300320000  | -0.118337000 | 5.081780000  | 1 | 1.589291000  | -2.160273000 | -5.128742000 |
| 1                    | 0.950358000  | 0.270995000  | 4.260657000  | 1 | -2.560979000 | 1.294474000  | -5.172710000 |
| 1                    | 1.848770000  | -0.857659000 | 4.756100000  | 1 | -4.420160000 | 2.050922000  | -3.347404000 |
|                      |              |              |              | 1 | -5.777391000 | 0.466044000  | 1.561513000  |
|                      |              |              |              | 1 | -5.064563000 | -1.580463000 | 3.137856000  |
|                      |              |              |              | 1 | 1.636550000  | -6.453740000 | -1.261772000 |
|                      |              |              |              | 1 | 3.767762000  | -7.698381000 | -0.890749000 |
|                      |              |              |              | 1 | 5.768529000  | -6.468318000 | -0.022384000 |
|                      |              |              |              | 1 | 5.648456000  | -4.055267000 | 0.427457000  |
|                      |              |              |              | 1 | -2.196992000 | -1.287247000 | -6.446501000 |
|                      |              |              |              | 1 | -1.643487000 | -0.619423000 | -8.771579000 |
|                      |              |              |              | 1 | 0.437212000  | 0.681314000  | -9.242752000 |
|                      |              |              |              | 1 | 1.952579000  | 1.305129000  | -7.356983000 |
|                      |              |              |              | 1 | 1.390064000  | 0.638280000  | -5.032593000 |
|                      |              |              |              | 1 | -6.867409000 | 0.822527000  | -1.210108000 |
|                      |              |              |              | 1 | -8.306133000 | 2.840806000  | -0.971813000 |
|                      |              |              |              | 1 | -7.269720000 | 5.033517000  | -0.352722000 |
|                      |              |              |              | 1 | -4.821337000 | 5.184718000  | 0.014229000  |
|                      |              |              |              | 1 | -3.532904000 | -2.756759000 | 6.767367000  |
|                      |              |              |              | 1 | -4.447118000 | -5.080548000 | 6.839186000  |
|                      |              |              |              | 1 | -4.555440000 | -6.426557000 | 4.736759000  |
|                      |              |              |              | 1 | -3.761407000 | -5.457721000 | 2.594004000  |
|                      |              |              |              | 1 | 4.443142000  | -1.630161000 | 1.530772000  |
|                      |              |              |              | 1 | 5.466307000  | -2.118712000 | 0.163488000  |
| <b>5RC1 H3O+,K+:</b> |              |              |              |   |              |              |              |
| 6                    | 0.725570000  | 0.355787000  | -5.853101000 |   |              |              |              |
| 6                    | -0.440608000 | -0.379998000 | -5.568441000 |   |              |              |              |
| 6                    | -1.286285000 | -0.715871000 | -6.643610000 |   |              |              |              |
| 6                    | -0.974355000 | -0.339603000 | -7.953345000 |   |              |              |              |
| 6                    | 0.192351000  | 0.386729000  | -8.218975000 |   |              |              |              |
| 6                    | 1.041121000  | 0.733207000  | -7.162772000 |   |              |              |              |
| 6                    | -0.780956000 | -0.786190000 | -4.167802000 |   |              |              |              |
| 6                    | 0.056411000  | -1.700076000 | -3.517420000 |   |              |              |              |
| 7                    | -0.096963000 | -2.177288000 | -2.232282000 |   |              |              |              |
| 6                    | 0.938738000  | -3.057462000 | -1.988162000 |   |              |              |              |
| 6                    | 1.789223000  | -3.130065000 | -3.167459000 |   |              |              |              |
| 6                    | 1.237940000  | -2.321592000 | -4.112348000 |   |              |              |              |
| 26                   | -1.459053000 | -1.539126000 | -0.801993000 |   |              |              |              |
| 7                    | -2.416216000 | -0.405187000 | -2.307722000 |   |              |              |              |
| 6                    | -3.449582000 | 0.476681000  | -2.072855000 |   |              |              |              |
| 6                    | -3.657873000 | 1.283322000  | -3.229691000 |   |              |              |              |
| 6                    | -2.694026000 | 0.896458000  | -4.169623000 |   |              |              |              |
| 6                    | -1.933640000 | -0.157731000 | -3.575049000 |   |              |              |              |
| 6                    | -4.160494000 | 0.618630000  | -0.832848000 |   |              |              |              |

|                      |              |              |              |    |              |              |              |
|----------------------|--------------|--------------|--------------|----|--------------|--------------|--------------|
| 1                    | -1.955512000 | 4.761249000  | 0.381419000  | 6  | 0.710266000  | 2.835265000  | 3.898981000  |
| 1                    | -3.325448000 | 4.436112000  | 1.456166000  | 26 | -1.485581000 | 1.430271000  | 0.381201000  |
| 7                    | -0.676773000 | 3.645165000  | 2.523504000  | 7  | -2.674520000 | 0.631867000  | 1.930006000  |
| 19                   | 2.094793000  | 1.840071000  | 0.812784000  | 6  | -3.686682000 | -0.265478000 | 1.707836000  |
| 8                    | 1.808290000  | 4.779533000  | 0.983058000  | 6  | -4.091551000 | -0.850670000 | 2.967502000  |
| 8                    | 1.772979000  | 1.939614000  | 3.654803000  | 6  | -3.304151000 | -0.287395000 | 3.939749000  |
| 8                    | 4.125926000  | 3.419788000  | -0.356387000 | 6  | -2.400961000 | 0.629590000  | 3.273263000  |
| 8                    | 4.410387000  | 1.582528000  | 2.630505000  | 6  | -4.283448000 | -0.562448000 | 0.456030000  |
| 6                    | 1.030289000  | 2.949720000  | 4.329923000  | 6  | -5.216881000 | -1.736793000 | 0.405005000  |
| 1                    | 1.578237000  | 3.906085000  | 4.260907000  | 6  | -4.700431000 | -3.048065000 | 0.279350000  |
| 6                    | -0.405326000 | 3.054099000  | 3.850520000  | 6  | -5.561615000 | -4.151080000 | 0.212104000  |
| 1                    | 0.960040000  | 2.697380000  | 5.403616000  | 6  | -6.946094000 | -3.962652000 | 0.250188000  |
| 1                    | -0.941485000 | 3.657384000  | 4.607043000  | 6  | -7.475785000 | -2.676221000 | 0.374962000  |
| 1                    | -0.853935000 | 2.054889000  | 3.849092000  | 6  | -6.610513000 | -1.580682000 | 0.456056000  |
| 6                    | 2.850838000  | 1.459994000  | 4.449616000  | 6  | 1.083532000  | 3.748221000  | 0.409407000  |
| 1                    | 3.369605000  | 2.305839000  | 4.934974000  | 6  | 2.405358000  | 4.457336000  | 0.332277000  |
| 1                    | 2.471157000  | 0.791951000  | 5.246456000  | 6  | 2.568262000  | 5.757678000  | 0.828463000  |
| 6                    | 3.847613000  | 0.699564000  | 3.602495000  | 6  | 3.815811000  | 6.391432000  | 0.836217000  |
| 1                    | 4.634384000  | 0.300199000  | 4.264310000  | 6  | 4.928788000  | 5.708084000  | 0.344511000  |
| 1                    | 3.357711000  | -0.157070000 | 3.105204000  | 6  | 4.796745000  | 4.413231000  | -0.168759000 |
| 6                    | 5.806180000  | 1.499996000  | 2.367412000  | 6  | 3.540931000  | 3.790395000  | -0.192925000 |
| 1                    | 6.113283000  | 2.516295000  | 2.088916000  | 8  | 3.307073000  | 2.564189000  | -0.748052000 |
| 1                    | 6.358580000  | 1.231603000  | 3.284810000  | 6  | 4.333251000  | 1.653003000  | -1.046670000 |
| 6                    | 6.183899000  | 0.501228000  | 1.256423000  | 6  | 4.589603000  | 0.718407000  | 0.156584000  |
| 1                    | 7.236582000  | 0.686347000  | 0.982514000  | 7  | 5.453302000  | -0.343020000 | -0.008024000 |
| 6                    | 6.151569000  | -0.519428000 | 1.653345000  | 8  | -3.331891000 | -3.202062000 | 0.301287000  |
| 6                    | -0.252890000 | 5.038528000  | 2.318960000  | 6  | -2.673341000 | -4.163457000 | -0.520827000 |
| 6                    | 0.507907000  | 5.359477000  | 1.036671000  | 6  | -1.849330000 | -3.405733000 | -1.576974000 |
| 1                    | -1.115820000 | 5.724873000  | 2.362942000  | 8  | -2.408536000 | -2.493830000 | -2.177371000 |
| 1                    | 0.381839000  | 5.317241000  | 3.170393000  | 7  | -0.891541000 | 3.003079000  | -0.907385000 |
| 1                    | 0.600391000  | 6.460571000  | 0.987371000  | 6  | 0.293308000  | 3.678644000  | -0.763304000 |
| 1                    | -0.052297000 | 5.045912000  | 0.139377000  | 6  | 0.611594000  | 4.359831000  | -2.001176000 |
| 6                    | 2.496758000  | 5.207193000  | -0.196891000 | 6  | -0.398921000 | 4.081390000  | -2.879341000 |
| 1                    | 2.442496000  | 6.308467000  | -0.269975000 | 6  | -1.332026000 | 3.209928000  | -2.188646000 |
| 6                    | 3.955654000  | 4.820161000  | -0.184825000 | 6  | -2.469634000 | 2.611519000  | -2.792999000 |
| 1                    | 1.999536000  | 4.785728000  | -1.090637000 | 6  | -2.804861000 | 3.033707000  | -4.192358000 |
| 1                    | 4.439838000  | 5.359141000  | -1.020989000 | 6  | -2.672288000 | 2.143022000  | -5.273506000 |
| 1                    | 4.433864000  | 5.148524000  | 0.755254000  | 6  | -2.985248000 | 2.543182000  | -6.576356000 |
| 6                    | 5.665879000  | 1.617278000  | -0.942288000 | 6  | -3.439489000 | 3.843009000  | -6.823659000 |
| 1                    | 6.728601000  | 1.492714000  | -1.215928000 | 6  | -3.575999000 | 4.739680000  | -5.758579000 |
| 1                    | 5.059371000  | 1.389387000  | -1.827065000 | 6  | -3.260089000 | 4.338707000  | -4.456798000 |
| 6                    | 5.483056000  | 3.085608000  | -0.591370000 | 7  | -3.112102000 | 1.112233000  | -0.935262000 |
| 1                    | 5.861752000  | 3.661682000  | -1.458102000 | 6  | -3.286892000 | 1.626731000  | -2.191248000 |
| 1                    | 6.105331000  | 3.383367000  | 0.271505000  | 6  | -4.429564000 | 0.976642000  | -2.820323000 |
| 8                    | 3.818067000  | 4.447516000  | 3.103248000  | 6  | -4.892697000 | 0.046171000  | -1.937468000 |
| 1                    | 3.085710000  | 4.645083000  | 2.493220000  | 6  | -4.073774000 | 0.157371000  | -0.740082000 |
| 1                    | 3.996386000  | 3.502143000  | 2.951566000  | 8  | 4.014236000  | 0.935514000  | 1.214079000  |
| 6                    | -0.175570000 | -0.099550000 | -0.080396000 | 1  | -2.311639000 | 1.128085000  | -5.089392000 |
| 8                    | 0.368188000  | -0.450163000 | 0.963455000  | 1  | 1.488084000  | 4.981099000  | -2.173007000 |
| 8                    | 0.007288000  | 0.950006000  | -0.756555000 | 1  | -0.493261000 | 4.424278000  | -3.906851000 |
| 8                    | -1.350251000 | 2.578121000  | -2.001102000 | 1  | 2.301338000  | 4.088545000  | 3.038129000  |
| 1                    | -2.071509000 | 2.817362000  | -1.324602000 | 1  | 0.916545000  | 2.837368000  | 4.966578000  |
| 1                    | -0.826280000 | 1.862041000  | -1.585069000 | 1  | -3.336269000 | -0.484099000 | 5.008755000  |
| 1                    | -1.842334000 | 2.195820000  | -2.787043000 | 1  | -4.883264000 | -1.584850000 | 3.101192000  |
|                      |              |              |              | 1  | -5.732547000 | -0.631680000 | -2.069833000 |
|                      |              |              |              | 1  | -4.824049000 | 1.201500000  | -3.808321000 |
|                      |              |              |              | 1  | 1.692618000  | 6.275815000  | 1.227665000  |
|                      |              |              |              | 1  | 3.915132000  | 7.405131000  | 1.230831000  |
|                      |              |              |              | 1  | 5.914673000  | 6.179876000  | 0.351908000  |
|                      |              |              |              | 1  | 5.681641000  | 3.904022000  | -0.551081000 |
|                      |              |              |              | 1  | -2.999249000 | 2.337596000  | 5.834489000  |
|                      |              |              |              | 1  | -2.803114000 | 2.091589000  | 8.297754000  |
|                      |              |              |              | 1  | -0.908422000 | 0.795423000  | 9.281581000  |
|                      |              |              |              | 1  | 0.784847000  | -0.251315000 | 7.773257000  |
|                      |              |              |              | 1  | 0.583379000  | -0.003095000 | 5.310478000  |
|                      |              |              |              | 1  | -7.018153000 | -0.571566000 | 0.554687000  |
|                      |              |              |              | 1  | -8.556809000 | -2.523901000 | 0.413199000  |
| <b>5IM1 H3O+,K+:</b> |              |              |              |    |              |              |              |
| 6                    | -0.158487000 | 0.460719000  | 5.965355000  |    |              |              |              |
| 6                    | -1.220942000 | 1.186534000  | 5.396666000  |    |              |              |              |
| 6                    | -2.169254000 | 1.766859000  | 6.258542000  |    |              |              |              |
| 6                    | -2.057790000 | 1.628616000  | 7.645704000  |    |              |              |              |
| 6                    | -0.995721000 | 0.904429000  | 8.197552000  |    |              |              |              |
| 6                    | -0.046491000 | 0.320210000  | 7.352214000  |    |              |              |              |
| 6                    | -1.345340000 | 1.335231000  | 3.908929000  |    |              |              |              |
| 6                    | -0.391645000 | 2.140879000  | 3.247466000  |    |              |              |              |
| 7                    | -0.347579000 | 2.388731000  | 1.899634000  |    |              |              |              |
| 6                    | 0.725528000  | 3.205351000  | 1.664539000  |    |              |              |              |
| 6                    | 1.414983000  | 3.470423000  | 2.919204000  |    |              |              |              |

|                                 |              |              |              |    |              |              |              |
|---------------------------------|--------------|--------------|--------------|----|--------------|--------------|--------------|
| 1                               | -7.607686000 | -4.830710000 | 0.196115000  | 6  | -0.656167000 | 7.904188000  | -1.651212000 |
| 1                               | -5.153048000 | -5.161160000 | 0.145445000  | 6  | 0.491166000  | 8.289580000  | -0.949862000 |
| 1                               | -2.870013000 | 1.836246000  | -7.402197000 | 6  | 1.329984000  | 7.310382000  | -0.406930000 |
| 1                               | -3.685254000 | 4.155886000  | -7.841672000 | 6  | -0.460835000 | 4.103905000  | -1.438318000 |
| 1                               | -3.933270000 | 5.756739000  | -5.940270000 | 6  | 0.450497000  | 3.295026000  | -2.157909000 |
| 1                               | -3.373419000 | 5.043334000  | -3.629142000 | 7  | 0.347978000  | 1.930839000  | -2.313028000 |
| 1                               | 3.984304000  | 1.080190000  | -1.918859000 | 6  | 1.473505000  | 1.495492000  | -2.961744000 |
| 1                               | 5.269927000  | 2.146168000  | -1.349414000 | 6  | 2.322446000  | 2.634841000  | -3.257932000 |
| 1                               | -2.102815000 | -4.835774000 | 0.129661000  | 6  | 1.682580000  | 3.745750000  | -2.781971000 |
| 1                               | -3.401494000 | -4.774185000 | -1.076325000 | 26 | -1.178276000 | 0.651415000  | -1.614223000 |
| 7                               | -0.567730000 | -3.781503000 | -1.867494000 | 7  | -2.179556000 | 2.374530000  | -0.930561000 |
| 19                              | 2.572455000  | -1.727137000 | -0.685811000 | 6  | -3.277828000 | 2.290809000  | -0.118154000 |
| 8                               | 1.828335000  | -4.199306000 | 0.424971000  | 6  | -3.462189000 | 3.564624000  | 0.558734000  |
| 8                               | 2.419023000  | -3.145577000 | -3.041353000 | 6  | -2.461214000 | 4.398487000  | 0.108571000  |
| 8                               | 4.062163000  | -2.565191000 | 1.482622000  | 6  | -1.655772000 | 3.635779000  | -0.819089000 |
| 8                               | 5.102139000  | -2.585979000 | -2.041297000 | 6  | -4.116324000 | 1.157160000  | 0.040927000  |
| 6                               | 1.239766000  | -3.595594000 | -3.695390000 | 6  | -5.195832000 | 1.222144000  | 1.084182000  |
| 1                               | 1.226759000  | -4.698958000 | -3.772632000 | 6  | -4.967501000 | 0.784247000  | 2.405406000  |
| 6                               | -0.005745000 | -3.049566000 | -3.026243000 | 6  | -5.972300000 | 0.822756000  | 3.375084000  |
| 1                               | 1.239829000  | -3.208420000 | -4.731045000 | 6  | -7.247352000 | 1.277796000  | 3.031052000  |
| 1                               | -0.797740000 | -3.015745000 | -3.788476000 | 6  | -7.503886000 | 1.717064000  | 1.729883000  |
| 1                               | 0.172980000  | -1.999854000 | -2.738228000 | 6  | -6.483463000 | 1.692974000  | 0.776097000  |
| 6                               | 3.614368000  | -3.494011000 | -3.726266000 | 6  | 1.755594000  | 0.155383000  | -3.327769000 |
| 1                               | 3.921672000  | -4.519299000 | -3.454841000 | 6  | 3.133568000  | -0.157409000 | -3.832540000 |
| 1                               | 3.447735000  | -3.460952000 | -4.818461000 | 6  | 3.362801000  | -0.345558000 | -5.207954000 |
| 6                               | 4.722093000  | -2.509588000 | -3.417336000 | 6  | 4.623454000  | -0.681898000 | -5.703879000 |
| 1                               | 5.588299000  | -2.760212000 | -4.055200000 | 6  | 5.689425000  | -0.855498000 | -4.815872000 |
| 1                               | 4.394456000  | -1.485243000 | -3.671817000 | 6  | 5.488655000  | -0.677883000 | -3.446425000 |
| 6                               | 6.351401000  | -1.978704000 | -1.717730000 | 6  | 4.225303000  | -0.320401000 | -2.953756000 |
| 1                               | 6.828904000  | -2.612479000 | -0.958292000 | 8  | 4.036625000  | -0.163279000 | -1.588065000 |
| 1                               | 7.015395000  | -1.986153000 | -2.598550000 | 6  | 4.811948000  | 0.886840000  | -1.013874000 |
| 6                               | 6.247761000  | -0.531993000 | -1.227539000 | 6  | 4.703692000  | 1.046958000  | 0.511830000  |
| 1                               | 7.280796000  | -0.174740000 | -1.058305000 | 7  | 5.197647000  | 0.072393000  | 1.357820000  |
| 1                               | 5.831439000  | 0.082605000  | -2.033182000 | 8  | -3.663453000 | 0.397772000  | 2.759510000  |
| 6                               | 0.117693000  | -4.900003000 | -1.206088000 | 6  | -3.418423000 | -0.751726000 | 3.611091000  |
| 6                               | 0.508641000  | -4.722866000 | 0.266368000  | 6  | -2.778389000 | -1.862902000 | 2.762409000  |
| 1                               | -0.507121000 | -5.803706000 | -1.279484000 | 8  | -3.401203000 | -2.230223000 | 1.771110000  |
| 1                               | 1.029444000  | -5.131679000 | -1.769712000 | 7  | -0.476456000 | -0.843965000 | -2.900554000 |
| 1                               | 0.471595000  | -5.718001000 | 0.747980000  | 6  | 0.827237000  | -0.913125000 | -3.322533000 |
| 1                               | -0.198282000 | -4.068144000 | 0.798512000  | 6  | 1.089622000  | -2.246801000 | -3.837760000 |
| 6                               | 2.148483000  | -4.013380000 | 1.807799000  | 6  | -0.081517000 | -2.943809000 | -2.748624000 |
| 1                               | 1.853383000  | -4.913034000 | 2.378142000  | 6  | -1.061709000 | -2.055812000 | -3.147576000 |
| 6                               | 3.632671000  | -3.813498000 | 2.010601000  | 6  | -2.390309000 | -2.422925000 | -2.808066000 |
| 1                               | 1.574652000  | -3.158481000 | 2.208305000  | 6  | -2.864264000 | -3.774149000 | -3.248480000 |
| 1                               | 3.837786000  | -3.853348000 | 3.097545000  | 6  | -3.165038000 | -4.778447000 | -2.309344000 |
| 1                               | 4.185512000  | -4.637972000 | 1.527052000  | 6  | -3.600775000 | -6.040465000 | -2.723999000 |
| 6                               | 5.920354000  | -1.004857000 | 1.221639000  | 6  | -3.747004000 | -6.322087000 | -4.086556000 |
| 1                               | 7.023731000  | -0.999529000 | 1.220448000  | 6  | -3.451700000 | -5.333364000 | -5.031027000 |
| 1                               | 5.580930000  | -0.383797000 | 2.059174000  | 6  | -3.012390000 | -4.072647000 | -4.615685000 |
| 6                               | 5.474472000  | -2.442335000 | 1.477744000  | 7  | -2.976322000 | -0.409560000 | -1.496273000 |
| 1                               | 5.883837000  | -2.723104000 | 2.467346000  | 6  | -3.276396000 | -1.629715000 | -2.041025000 |
| 1                               | 5.900134000  | -3.151940000 | 0.747379000  | 6  | -4.618615000 | -2.016244000 | -1.631180000 |
| 8                               | 4.241900000  | -5.175037000 | -0.953468000 | 6  | -5.068065000 | -1.052392000 | -0.778363000 |
| 1                               | 3.378221000  | -4.927358000 | -0.578029000 | 6  | -4.030868000 | -0.037534000 | -0.706704000 |
| 1                               | 4.611078000  | -4.332117000 | -1.272071000 | 8  | 4.303022000  | 2.123903000  | 0.937239000  |
| 6                               | -0.115884000 | -0.083818000 | -0.232395000 | 1  | -3.046494000 | -4.566874000 | -1.243928000 |
| 8                               | 0.592766000  | 0.056073000  | -1.238502000 | 1  | 2.038184000  | -2.601470000 | -4.232590000 |
| 8                               | 0.182855000  | -1.243464000 | 0.466678000  | 1  | -0.257778000 | -3.974683000 | -4.045941000 |
| 8                               | -1.424397000 | -2.468665000 | 2.275946000  | 1  | 3.267353000  | 2.596399000  | -3.795804000 |
| 1                               | -2.184569000 | -2.666595000 | 1.692302000  | 1  | 2.017094000  | 4.777703000  | -2.853605000 |
| 1                               | -0.449402000 | -1.429720000 | 1.199231000  | 1  | -2.298275000 | 5.435206000  | 0.393223000  |
| 1                               | -1.832439000 | -2.026310000 | 3.037170000  | 1  | -4.292473000 | 3.829912000  | 1.211912000  |
|                                 |              |              |              | 1  | -6.024822000 | -1.016840000 | -0.263121000 |
|                                 |              |              |              | 1  | -5.142653000 | -2.916489000 | -1.942227000 |
|                                 |              |              |              | 1  | 2.523919000  | -0.219812000 | -5.896676000 |
|                                 |              |              |              | 1  | 4.770803000  | -0.814294000 | -6.778178000 |
|                                 |              |              |              | 1  | 6.679028000  | -1.134629000 | -5.185638000 |
| <b><sup>5</sup>RC2 H3O+,K+:</b> |              |              |              |    |              |              |              |
| 6                               | 1.025423000  | 5.955486000  | -0.566957000 |    |              |              |              |
| 6                               | -0.125899000 | 5.553211000  | -1.270070000 |    |              |              |              |
| 6                               | -0.963014000 | 6.549231000  | -1.807199000 |    |              |              |              |





|    |              |              |              |                      |              |              |              |
|----|--------------|--------------|--------------|----------------------|--------------|--------------|--------------|
| 1  | 3.711677000  | 1.970695000  | -3.755308000 | 1                    | 5.513901000  | -0.138199000 | 5.000413000  |
| 1  | 2.666869000  | 4.364829000  | -3.133951000 | 1                    | 4.910231000  | -1.684585000 | 4.376070000  |
| 1  | -1.723047000 | 5.854771000  | -0.309798000 | 8                    | 2.586065000  | -3.130238000 | 5.059882000  |
| 1  | -3.857698000 | 4.543286000  | 0.666252000  | 1                    | 1.952153000  | -2.397849000 | 4.971621000  |
| 1  | -6.083744000 | -0.185365000 | -0.418959000 | 1                    | 3.032600000  | -3.175893000 | 4.196644000  |
| 1  | -5.369729000 | -2.337105000 | -1.862376000 | 6                    | -0.282593000 | 0.582154000  | 0.296175000  |
| 1  | 2.728931000  | -0.728641000 | -5.712458000 | 8                    | -0.349270000 | -0.291403000 | 1.126228000  |
| 1  | 4.909169000  | -1.658724000 | -6.462374000 | 8                    | 0.261192000  | 1.851586000  | 0.946235000  |
| 1  | 6.657831000  | -2.239973000 | -4.765572000 | 8                    | -1.536152000 | 2.782207000  | 2.370703000  |
| 1  | 6.209291000  | -1.851120000 | -2.350462000 | 1                    | -2.297306000 | 2.114701000  | 2.446603000  |
| 1  | -1.049825000 | 6.265042000  | -3.172176000 | 1                    | 0.450879000  | 2.498480000  | 0.242882000  |
| 1  | -0.272326000 | 8.622413000  | -3.147623000 | 1                    | -0.709135000 | 2.366101000  | 1.791683000  |
| 1  | 1.739403000  | 9.265526000  | -1.814651000 | 1                    | -1.888145000 | 3.538285000  | 1.846460000  |
| 1  | 2.960125000  | 7.524533000  | -0.504760000 |                      |              |              |              |
| 1  | 2.178850000  | 5.169226000  | -0.530005000 |                      |              |              |              |
| 1  | -6.372702000 | 2.945414000  | -0.536973000 | <b>5IM2 H3O+,K+:</b> |              |              |              |
| 1  | -8.145037000 | 3.332202000  | 1.167093000  | 6                    | 0.149903000  | 6.778454000  | -0.571967000 |
| 1  | -7.751263000 | 2.638935000  | 3.540374000  | 6                    | -0.146609000 | 6.118700000  | -1.778290000 |
| 1  | -5.597473000 | 1.595792000  | 4.183719000  | 6                    | -0.260543000 | 6.885957000  | -2.951721000 |
| 1  | -4.537782000 | -6.339075000 | -1.395367000 | 6                    | -0.088262000 | 8.273144000  | -2.919402000 |
| 1  | -4.734725000 | -7.076207000 | -3.773578000 | 6                    | 0.205567000  | 8.917387000  | -1.713032000 |
| 1  | -3.912824000 | -5.584383000 | -5.600020000 | 6                    | 0.325561000  | 8.165239000  | -0.539656000 |
| 1  | -2.905432000 | -3.382656000 | -5.053044000 | 6                    | -0.330410000 | 4.630607000  | -1.824986000 |
| 1  | 5.846340000  | 0.075899000  | -1.031077000 | 6                    | 0.678364000  | 3.881288000  | -2.483759000 |
| 1  | 4.435197000  | 1.165463000  | -1.141136000 | 7                    | 0.686529000  | 2.520635000  | -2.690396000 |
| 1  | -2.831748000 | 0.306678000  | 4.290177000  | 6                    | 1.924732000  | 2.179555000  | -3.188788000 |
| 1  | -4.462462000 | -0.239612000 | 3.857882000  | 6                    | 2.721079000  | 3.379620000  | -3.327745000 |
| 7  | -1.940772000 | -1.993681000 | 3.115479000  | 6                    | 1.945310000  | 4.429469000  | -2.917988000 |
| 19 | 1.996733000  | -1.046652000 | 2.053461000  | 26                   | -0.597128000 | 1.150120000  | -1.750415000 |
| 8  | 0.901164000  | -0.703207000 | 4.754040000  | 7                    | -1.786425000 | 2.760244000  | -1.095928000 |
| 8  | 0.773310000  | -3.615313000 | 2.277805000  | 6                    | -2.928345000 | 2.645918000  | -0.347008000 |
| 8  | 3.635018000  | -0.081855000 | 4.114280000  | 6                    | -3.346546000 | 3.965834000  | 0.090190000  |
| 8  | 3.734358000  | -3.266392000 | 2.309099000  | 6                    | -2.455302000 | 4.859631000  | -0.434837000 |
| 6  | -0.530222000 | -0.099808000 | 2.590771000  | 6                    | -1.462119000 | 4.090096000  | -1.167591000 |
| 1  | -0.582694000 | -4.418980000 | 3.648681000  | 6                    | -3.639357000 | 1.449098000  | -0.105225000 |
| 6  | -1.630206000 | -3.126161000 | 2.215430000  | 6                    | -4.845907000 | 1.498144000  | 0.790783000  |
| 1  | -0.719218000 | -5.005670000 | 1.986446000  | 6                    | -4.737218000 | 1.239221000  | 2.176280000  |
| 1  | -2.551780000 | -3.717963000 | 2.097394000  | 6                    | -5.876369000 | 1.227406000  | 2.990002000  |
| 1  | -1.402623000 | -2.713141000 | 1.221261000  | 6                    | -7.136166000 | 1.468316000  | 2.435140000  |
| 6  | 1.739390000  | -4.659814000 | 2.262704000  | 6                    | -7.263431000 | 1.739412000  | 1.070930000  |
| 1  | 1.965229000  | -4.986809000 | 3.293474000  | 6                    | -6.121598000 | 1.754972000  | 0.264959000  |
| 1  | 1.334999000  | -5.529314000 | 1.711371000  | 6                    | 2.366279000  | 0.864446000  | -3.490328000 |
| 6  | 3.009333000  | -4.241143000 | 1.552297000  | 6                    | 3.793297000  | 0.672481000  | -3.909803000 |
| 1  | 3.631294000  | -5.142254000 | 1.414909000  | 6                    | 4.240022000  | 1.197880000  | -5.138698000 |
| 1  | 2.766983000  | -3.847893000 | 0.547641000  | 6                    | 5.542752000  | 1.010280000  | -5.600181000 |
| 6  | 5.133252000  | -3.167933000 | 2.026407000  | 6                    | 6.446801000  | 0.278443000  | -4.822982000 |
| 1  | 5.649120000  | -3.074780000 | 2.992537000  | 6                    | 6.038611000  | -0.246638000 | -3.598635000 |
| 1  | 5.489714000  | -4.103948000 | 1.566033000  | 6                    | 4.726983000  | -0.060914000 | -3.133308000 |
| 6  | 5.515839000  | -2.016549000 | 1.092829000  | 8                    | 4.447750000  | -0.688884000 | -1.943933000 |
| 1  | 6.609417000  | -2.083892000 | 0.936671000  | 6                    | 3.633538000  | -0.080145000 | -0.947840000 |
| 1  | 5.029048000  | -2.159805000 | 0.121952000  | 6                    | 4.254834000  | -0.202043000 | 0.452504000  |
| 6  | -1.251849000 | -1.783320000 | 4.391672000  | 7                    | 4.497713000  | -1.445164000 | 0.993075000  |
| 6  | -0.486720000 | -0.454148000 | 4.539188000  | 8                    | -3.465175000 | 1.104466000  | 2.694871000  |
| 1  | -1.960129000 | -1.903508000 | 5.226459000  | 6                    | -3.161525000 | 0.222343000  | 3.764597000  |
| 1  | -0.517382000 | -2.587354000 | 4.509485000  | 6                    | -2.771229000 | -1.162682000 | 3.220534000  |
| 1  | -0.878005000 | 0.120903000  | 5.396706000  | 8                    | -3.163424000 | -1.476464000 | 2.104247000  |
| 1  | -0.602301000 | 0.156950000  | 3.629750000  | 7                    | 0.309530000  | -0.365305000 | -2.872660000 |
| 6  | 1.591937000  | 0.449406000  | 5.233357000  | 6                    | 1.564102000  | -0.296751000 | -3.416585000 |
| 1  | 1.177328000  | 0.756249000  | 6.211104000  | 6                    | 1.939231000  | -1.601288000 | -3.929534000 |
| 6  | 3.059052000  | 0.136769000  | 5.392607000  | 6                    | 0.885498000  | -2.436703000 | -3.695382000 |
| 1  | 1.458919000  | 1.292101000  | 4.529145000  | 6                    | -0.138462000 | -1.651646000 | -3.025523000 |
| 1  | 3.552022000  | 0.989888000  | 5.895964000  | 6                    | -1.382504000 | -2.152960000 | -2.575293000 |
| 1  | 3.184640000  | -0.756628000 | 6.029501000  | 6                    | -1.704289000 | -3.584576000 | -2.882252000 |
| 6  | 5.723524000  | -0.271559000 | 2.895627000  | 6                    | -1.819063000 | -4.532585000 | -1.848659000 |
| 1  | 6.724856000  | -0.726145000 | 2.986641000  | 6                    | -2.113706000 | -5.869557000 | -2.132058000 |
| 1  | 5.848631000  | 0.817022000  | 2.850238000  | 6                    | -2.303522000 | -6.282697000 | -3.455072000 |
| 6  | 4.952110000  | -0.601980000 | 4.168303000  | 6                    | -2.196257000 | -5.349695000 | -4.491792000 |
|    |              |              |              | 6                    | -1.897935000 | -4.013437000 | -4.207886000 |

|    |              |              |              |   |              |              |              |
|----|--------------|--------------|--------------|---|--------------|--------------|--------------|
| 7  | -2.204831000 | -0.119437000 | -1.395630000 | 1 | 1.862736000  | -0.231687000 | 6.565704000  |
| 6  | -2.342226000 | -1.413136000 | -1.843287000 | 6 | 3.274812000  | -1.063468000 | 5.210477000  |
| 6  | -3.638933000 | -1.917451000 | -1.439913000 | 1 | 1.842915000  | 0.530366000  | 4.953828000  |
| 6  | -4.245814000 | -0.932995000 | -0.714887000 | 1 | 4.040873000  | -0.436439000 | 5.704933000  |
| 6  | -3.346947000 | 0.199257000  | -0.700856000 | 1 | 3.320805000  | -2.069441000 | 5.662350000  |
| 8  | 4.486639000  | 0.834352000  | 1.066254000  | 6 | 5.344609000  | -1.470048000 | 2.194150000  |
| 1  | -1.671389000 | -4.215822000 | -0.813395000 | 1 | 6.195574000  | -2.149247000 | 2.012739000  |
| 1  | 2.875823000  | -1.840566000 | -4.427537000 | 1 | 5.742505000  | -0.455419000 | 2.312107000  |
| 1  | 0.809099000  | -3.489958000 | -3.952491000 | 6 | 4.704241000  | -1.889916000 | 3.516759000  |
| 1  | 3.745486000  | 3.423704000  | -3.687790000 | 1 | 5.471748000  | -1.720113000 | 4.294185000  |
| 1  | 2.226040000  | 5.478965000  | -2.882876000 | 1 | 4.455323000  | -2.962960000 | 3.547762000  |
| 1  | -2.477481000 | 5.942472000  | -0.343278000 | 8 | 2.212576000  | -4.072346000 | 4.569266000  |
| 1  | -4.227889000 | 4.183323000  | 0.689740000  | 1 | 1.681988000  | -3.290433000 | 4.793350000  |
| 1  | -5.224118000 | -0.964884000 | -0.243733000 | 1 | 2.357488000  | -4.009155000 | 3.608862000  |
| 1  | -4.036872000 | -2.900235000 | -1.678158000 | 6 | 0.757554000  | 1.539050000  | -0.104242000 |
| 1  | 3.524688000  | 1.750601000  | -5.752200000 | 8 | 1.451979000  | 2.140393000  | 0.562632000  |
| 1  | 5.846708000  | 1.425877000  | -6.563494000 | 8 | -0.663867000 | 0.409040000  | 1.844065000  |
| 1  | 7.472217000  | 0.119905000  | -5.165810000 | 8 | -1.351378000 | 2.935663000  | 2.628986000  |
| 1  | 6.726844000  | -0.814056000 | -2.968792000 | 1 | -2.270595000 | 2.616026000  | 2.700698000  |
| 1  | -0.492728000 | 6.388847000  | -3.896859000 | 1 | -1.495773000 | 0.130837000  | 1.428672000  |
| 1  | -0.186068000 | 8.852439000  | -3.841143000 | 1 | -0.822407000 | 1.349057000  | 2.105304000  |
| 1  | 0.342075000  | 10.001440000 | -1.687561000 | 1 | -1.394096000 | 3.622658000  | 1.945769000  |
| 1  | 0.561144000  | 8.658984000  | 0.406630000  |   |              |              |              |
| 1  | 0.253757000  | 6.196277000  | 0.346937000  |   |              |              |              |
| 1  | -6.213215000 | 1.956499000  | -0.805169000 |   |              |              |              |
| 1  | -8.244914000 | 1.936380000  | 0.634007000  |   |              |              |              |
| 1  | -8.017336000 | 1.455875000  | 3.081139000  |   |              |              |              |
| 1  | -5.786577000 | 1.047284000  | 4.062347000  |   |              |              |              |
| 1  | -2.193195000 | -6.591055000 | -1.314806000 |   |              |              |              |
| 1  | -2.535250000 | -7.327404000 | -3.677177000 |   |              |              |              |
| 1  | -2.348783000 | -5.661614000 | -5.528221000 |   |              |              |              |
| 1  | -1.821685000 | -3.289275000 | -5.022614000 |   |              |              |              |
| 1  | 3.549088000  | 0.998098000  | -1.120368000 |   |              |              |              |
| 1  | 2.622175000  | -0.519086000 | -0.966113000 |   |              |              |              |
| 1  | -2.363058000 | 0.700423000  | 4.340880000  |   |              |              |              |
| 1  | -4.015806000 | 0.086278000  | 4.447634000  |   |              |              |              |
| 7  | -2.065993000 | -2.024827000 | 4.024789000  |   |              |              |              |
| 19 | 1.209754000  | -1.413804000 | 2.264747000  |   |              |              |              |
| 8  | 0.845560000  | -1.296669000 | 5.099514000  |   |              |              |              |
| 8  | -0.172072000 | -3.872597000 | 2.411444000  |   |              |              |              |
| 8  | 3.536264000  | -1.135083000 | 3.814835000  |   |              |              |              |
| 8  | 2.609906000  | -3.819435000 | 1.566798000  |   |              |              |              |
| 6  | -0.940662000 | -4.278571000 | 3.542090000  |   |              |              |              |
| 1  | -0.301728000 | -4.261298000 | 4.441503000  |   |              |              |              |
| 6  | -2.204867000 | -3.457117000 | 3.709965000  |   |              |              |              |
| 1  | -1.275948000 | -5.322422000 | 3.410352000  |   |              |              |              |
| 1  | -2.789313000 | -3.932472000 | 4.518565000  |   |              |              |              |
| 1  | -2.793002000 | -3.520746000 | 2.788136000  |   |              |              |              |
| 6  | 0.496587000  | -4.958399000 | 1.780323000  |   |              |              |              |
| 1  | 0.968911000  | -5.609267000 | 2.537197000  |   |              |              |              |
| 1  | -0.226347000 | -5.570984000 | 1.209185000  |   |              |              |              |
| 6  | 1.562482000  | -4.460120000 | 0.830866000  |   |              |              |              |
| 1  | 1.964121000  | -5.331554000 | 0.286857000  |   |              |              |              |
| 1  | 1.132987000  | -3.769219000 | 0.082310000  |   |              |              |              |
| 6  | 3.921384000  | -3.909751000 | 1.007447000  |   |              |              |              |
| 1  | 4.613032000  | -4.115440000 | 1.836420000  |   |              |              |              |
| 1  | 3.977589000  | -4.777202000 | 0.329449000  |   |              |              |              |
| 6  | 4.369454000  | -2.683497000 | 0.214824000  |   |              |              |              |
| 1  | 5.344959000  | -2.941657000 | -0.238105000 |   |              |              |              |
| 1  | 3.675348000  | -2.517092000 | -0.616564000 |   |              |              |              |
| 6  | -1.595385000 | -1.675376000 | 5.373439000  |   |              |              |              |
| 6  | -0.401949000 | -0.730735000 | 5.502867000  |   |              |              |              |
| 1  | -2.413848000 | -1.226739000 | 5.961986000  |   |              |              |              |
| 1  | -1.344716000 | -2.615085000 | 5.884826000  |   |              |              |              |
| 1  | -0.339936000 | -0.457414000 | 6.572221000  |   |              |              |              |
| 1  | -0.561351000 | 0.205888000  | 4.941293000  |   |              |              |              |
| 6  | 1.927298000  | -0.438293000 | 5.482023000  |   |              |              |              |

## UPBE0 data:

<sup>3</sup>CAT<sub>H3O+,K+</sub>:

|    |              |              |              |    |              |              |              |
|----|--------------|--------------|--------------|----|--------------|--------------|--------------|
| 6  | 3.471829000  | 3.882265000  | -2.302857000 | 1  | -2.140902000 | 5.048131000  | -0.396249000 |
| 6  | 2.183122000  | 3.774305000  | -2.857327000 | 1  | -5.903070000 | 1.340240000  | -0.773314000 |
| 6  | 1.792630000  | 4.753224000  | -3.788069000 | 1  | -5.922951000 | -1.312463000 | -1.365701000 |
| 6  | 2.649106000  | 5.792643000  | -4.150731000 | 1  | 1.820162000  | -4.266194000 | -3.593493000 |
| 6  | 3.924601000  | 5.880769000  | -3.591316000 | 1  | 3.625717000  | -5.837258000 | -2.191250000 |
| 6  | 4.330945000  | 4.919226000  | -2.663818000 | 1  | 5.778880000  | -5.837258000 | -2.191250000 |
| 6  | 1.260922000  | 2.679399000  | -2.463442000 | 1  | 5.700460000  | -4.034964000 | -0.522197000 |
| 6  | 1.684958000  | 1.338330000  | -2.625018000 | 1  | 0.797859000  | 4.688008000  | -4.236559000 |
| 7  | 1.015948000  | 0.227588000  | -2.121343000 | 1  | 2.319487000  | 6.536091000  | -4.881814000 |
| 6  | 1.859692000  | -0.850520000 | -2.337365000 | 1  | 4.597712000  | 6.693887000  | -3.875179000 |
| 6  | 3.023347000  | -0.430026000 | -3.025031000 | 1  | 5.324143000  | 4.981944000  | -2.210431000 |
| 6  | 2.905123000  | 0.934269000  | -3.227145000 | 1  | 3.795285000  | 3.140318000  | -1.568061000 |
| 26 | -0.919427000 | 0.133126000  | -1.638503000 | 1  | -4.611493000 | 4.679791000  | -1.437483000 |
| 7  | -0.988368000 | 2.129884000  | -1.564727000 | 1  | -6.249602000 | 6.012486000  | -0.120046000 |
| 6  | -1.987317000 | 2.888376000  | -0.975478000 | 1  | -6.806451000 | 5.326976000  | 2.215871000  |
| 6  | -1.558546000 | 4.245791000  | -0.846396000 | 1  | -5.685837000 | 3.360582000  | 3.232990000  |
| 6  | -0.315641000 | 4.331700000  | -1.426984000 | 1  | -6.725378000 | -4.805434000 | 0.558770000  |
| 6  | 0.033929000  | 3.016373000  | -1.867762000 | 1  | -6.848869000 | -6.437963000 | -1.323743000 |
| 6  | -3.261286000 | 2.415883000  | -0.636779000 | 1  | -5.300895000 | -6.191137000 | -3.265877000 |
| 6  | -4.208134000 | 3.268638000  | 0.126910000  | 1  | -3.661747000 | -4.330334000 | -3.321989000 |
| 6  | -4.526653000 | 2.914315000  | 1.462583000  | 1  | 5.110385000  | -2.592026000 | 1.341044000  |
| 6  | -5.458085000 | 3.644347000  | 2.203129000  | 1  | 5.937129000  | -1.977766000 | -0.109873000 |
| 6  | -6.079454000 | 4.757745000  | 1.630884000  | 1  | -4.095240000 | 1.468290000  | 4.006615000  |
| 6  | -5.766158000 | 5.141880000  | 0.329836000  | 1  | -5.454786000 | 0.989891000  | 2.949771000  |
| 6  | -4.840282000 | 4.396763000  | -0.406582000 | 7  | -2.471000000 | -0.489820000 | 2.675061000  |
| 6  | 1.605633000  | -2.180059000 | -1.914891000 | 19 | 1.899549000  | -0.220486000 | 0.741963000  |
| 6  | 2.713054000  | -3.168400000 | -1.986623000 | 8  | 0.425400000  | 1.650329000  | 2.323218000  |
| 6  | 2.677771000  | -4.215296000 | -2.918029000 | 8  | 0.337909000  | -2.191440000 | 2.717083000  |
| 6  | 3.689394000  | -5.171849000 | -3.010165000 | 8  | 3.219470000  | 2.106989000  | 2.170075000  |
| 6  | 4.776823000  | -5.095266000 | -2.145984000 | 8  | 3.070818000  | -1.476724000 | 3.213612000  |
| 6  | 4.851396000  | -3.065964000 | -1.205666000 | 6  | -1.017461000 | -2.542373000 | 2.920182000  |
| 6  | 3.838642000  | -4.104069000 | -1.131540000 | 1  | -1.284411000 | -2.449060000 | 3.990968000  |
| 8  | 3.866482000  | -2.085511000 | -0.225255000 | 6  | -1.956896000 | -1.708810000 | 2.069149000  |
| 6  | 5.037360000  | -1.866126000 | 0.520722000  | 1  | -1.149792000 | -3.606410000 | 2.646297000  |
| 6  | 5.028522000  | -0.398888000 | 0.943220000  | 1  | -2.835611000 | -2.318520000 | 1.831478000  |
| 7  | 5.342097000  | -0.054226000 | 2.217031000  | 1  | -1.468431000 | -1.471429000 | 1.106901000  |
| 8  | -3.839306000 | 1.864860000  | 1.974941000  | 6  | 1.201478000  | -2.985716000 | 3.493193000  |
| 6  | -4.359103000 | 1.068107000  | 3.010531000  | 1  | 1.104424000  | -2.727542000 | 4.565926000  |
| 6  | -3.820407000 | -0.343657000 | 2.779351000  | 1  | 0.940259000  | -4.056779000 | 3.387064000  |
| 8  | -4.609140000 | -1.267031000 | 2.621081000  | 6  | 2.630596000  | -2.814723000 | 3.043125000  |
| 7  | -0.834347000 | -1.857182000 | -1.626114000 | 1  | 3.267101000  | -3.509152000 | 3.615193000  |
| 6  | 0.316115000  | -2.629906000 | -1.583747000 | 1  | 2.716003000  | -3.082433000 | 1.975855000  |
| 6  | -0.020566000 | -3.987706000 | -1.285439000 | 6  | 4.169213000  | -1.228556000 | 4.072173000  |
| 6  | -1.392351000 | -4.060524000 | -1.235480000 | 1  | 3.910033000  | -0.335997000 | 4.659368000  |
| 6  | -1.891667000 | -2.740157000 | -1.456800000 | 1  | 4.305869000  | -2.059944000 | 4.783768000  |
| 6  | -3.253993000 | -2.400832000 | -1.458597000 | 6  | 5.472108000  | -0.999825000 | 3.310696000  |
| 6  | -4.253672000 | -3.499659000 | -1.421056000 | 1  | 6.220436000  | -0.613414000 | 4.019520000  |
| 6  | -5.134543000 | -3.656322000 | -0.335175000 | 1  | 5.877015000  | -1.949387000 | 2.941044000  |
| 6  | -6.057356000 | -4.701654000 | -0.300898000 | 6  | -1.512459000 | 0.511336000  | 3.099009000  |
| 6  | -6.125007000 | -5.619296000 | -1.351143000 | 6  | -0.930904000 | 1.388832000  | 1.991819000  |
| 6  | -5.256822000 | -5.481542000 | -2.434987000 | 1  | -1.956711000 | 1.135554000  | 3.885285000  |
| 6  | -4.335225000 | -4.434913000 | -2.467212000 | 1  | -0.673997000 | -0.016382000 | 3.577476000  |
| 7  | -2.867359000 | 0.039392000  | -1.251069000 | 1  | -1.482894000 | 2.334144000  | 1.899224000  |
| 6  | -3.700198000 | -1.061012000 | -1.385640000 | 1  | -0.998930000 | 0.890502000  | 1.007706000  |
| 6  | -5.058401000 | -0.658818000 | -1.268378000 | 6  | 0.968523000  | 2.844320000  | 1.800532000  |
| 6  | -5.048617000 | 0.690405000  | -0.959144000 | 1  | 0.288774000  | 3.692339000  | 1.998132000  |
| 6  | -3.691860000 | 1.100824000  | -0.945737000 | 6  | 2.283458000  | 3.112391000  | 2.481336000  |
| 8  | 4.779889000  | 0.435550000  | 0.083044000  | 1  | 1.089206000  | 2.778478000  | 0.702250000  |
| 1  | -5.081772000 | -2.950032000 | 0.497992000  | 1  | 2.658631000  | 4.103990000  | 2.162912000  |
| 1  | 0.692315000  | -4.800481000 | -1.159508000 | 1  | 2.116726000  | 3.156539000  | 3.574274000  |
| 1  | -2.004957000 | -1.940577000 | -1.048783000 | 6  | 5.512025000  | 1.366781000  | 2.491473000  |
| 1  | 3.840975000  | -1.081882000 | -3.329973000 | 1  | 6.336310000  | 1.475788000  | 3.213264000  |
| 1  | 3.613544000  | 1.595024000  | -3.722942000 | 1  | 5.815430000  | 1.842432000  | 1.549711000  |
| 1  | 0.313651000  | 5.214502000  | -1.523430000 | 6  | 4.318151000  | 2.119840000  | 3.050208000  |
|    |              |              |              | 1  | 4.661245000  | 3.158784000  | 3.217660000  |
|    |              |              |              | 1  | 4.005840000  | 1.723723000  | 4.034097000  |
|    |              |              |              | 8  | 1.506137000  | 0.455130000  | 4.636033000  |

|                                           |              |              |              |    |              |              |              |
|-------------------------------------------|--------------|--------------|--------------|----|--------------|--------------|--------------|
| 1                                         | 1.122231000  | 1.006341000  | 3.932973000  | 1  | -1.606261000 | 4.683694000  | -2.950895000 |
| 1                                         | 1.867676000  | -0.288872000 | 4.128270000  | 1  | -3.749988000 | 4.253531000  | -1.317036000 |
| <b><sup>3</sup>RC1<sub>H3O+, K+</sub></b> |              |              |              |    |              |              |              |
| 6                                         | 1.679553000  | 4.062450000  | -3.779712000 | 1  | -5.683705000 | -2.667117000 | 0.248349000  |
| 6                                         | 0.461352000  | 3.472331000  | -4.151844000 | 1  | 1.797538000  | -4.317930000 | -4.128426000 |
| 6                                         | -0.237613000 | 4.022513000  | -5.238078000 | 1  | 3.842838000  | -5.687072000 | -4.440141000 |
| 6                                         | 0.268700000  | 5.118205000  | -5.935475000 | 1  | 5.897085000  | -5.158790000 | -3.108029000 |
| 6                                         | 1.484024000  | 5.691247000  | -5.556970000 | 1  | 5.876257000  | -3.253348000 | -1.526116000 |
| 6                                         | 2.187244000  | 5.159402000  | -4.476029000 | 1  | -1.187757000 | 3.575591000  | -5.541929000 |
| 6                                         | -0.083911000 | 2.303413000  | -3.409450000 | 1  | -0.287912000 | 5.524771000  | -6.783903000 |
| 6                                         | 0.629489000  | 1.116053000  | -3.398954000 | 1  | 1.881006000  | 6.550765000  | -6.102931000 |
| 7                                         | 0.288877000  | -0.039887000 | -2.727358000 | 1  | 3.137126000  | 5.603962000  | -4.167735000 |
| 6                                         | 1.322832000  | -0.917964000 | -2.938974000 | 1  | 2.231865000  | 3.653256000  | -2.929511000 |
| 6                                         | 2.319693000  | -0.319296000 | -3.799915000 | 1  | -6.392988000 | 2.483806000  | -1.165463000 |
| 6                                         | 1.881776000  | 0.925949000  | -4.104114000 | 1  | -7.934323000 | 3.874316000  | 0.206131000  |
| 26                                        | -1.357753000 | -0.371961000 | -1.641032000 | 1  | -7.246544000 | 4.581488000  | 2.502241000  |
| 7                                         | -1.962308000 | 1.513337000  | -1.974360000 | 1  | -5.029477000 | 3.914975000  | 3.389279000  |
| 6                                         | -3.003343000 | 2.142211000  | -1.342301000 | 1  | -5.116389000 | -6.177362000 | 2.215139000  |
| 6                                         | -3.00052000  | 3.533522000  | -1.642276000 | 1  | -5.718510000 | -7.792098000 | 0.412946000  |
| 6                                         | -1.924563000 | 3.743843000  | -2.506116000 | 1  | -5.092272000 | -7.291717000 | -1.948879000 |
| 6                                         | -1.292713000 | 2.492325000  | -2.681726000 | 1  | -3.880122000 | -5.197490000 | -2.498300000 |
| 6                                         | -3.937409000 | 1.519160000  | -0.473393000 | 1  | 5.830543000  | -1.085228000 | -1.392217000 |
| 6                                         | -4.853043000 | 2.380406000  | 0.325565000  | 1  | 4.599522000  | -0.215089000 | -2.351572000 |
| 6                                         | -4.491426000 | 2.793879000  | 1.622315000  | 1  | -2.388977000 | 2.694173000  | 3.951075000  |
| 6                                         | -5.341625000 | 3.584462000  | 2.396356000  | 1  | -4.024946000 | 2.003423000  | 3.951566000  |
| 6                                         | -6.583294000 | 3.964889000  | 1.891127000  | 7  | -1.372978000 | 0.189250000  | 3.833377000  |
| 6                                         | -6.964300000 | 3.574052000  | 0.608736000  | 19 | 2.247643000  | 0.372537000  | 1.673417000  |
| 6                                         | -6.099292000 | 2.797037000  | -0.160414000 | 8  | 1.471743000  | 2.328793000  | 3.683615000  |
| 6                                         | 1.398070000  | -2.227538000 | -2.485250000 | 8  | 1.346321000  | -1.526683000 | 3.756557000  |
| 6                                         | 2.658455000  | -2.996509000 | -2.670072000 | 8  | 3.982075000  | 2.530436000  | 2.397847000  |
| 6                                         | 2.699845000  | -4.084825000 | -3.558020000 | 8  | 4.222617000  | -1.092404000 | 3.230274000  |
| 6                                         | 3.845689000  | -4.854608000 | -3.732726000 | 6  | 0.120747000  | -1.791870000 | 4.408985000  |
| 6                                         | 4.992424000  | -4.556290000 | -2.996760000 | 1  | 0.148718000  | -1.439731000 | 5.458602000  |
| 6                                         | 4.983122000  | -3.482917000 | -2.111642000 | 6  | -1.060667000 | -1.234677000 | 3.655619000  |
| 6                                         | 3.834731000  | -2.699429000 | -1.954838000 | 1  | -0.026520000 | -2.886847000 | 4.452981000  |
| 8                                         | 3.846977000  | -1.645953000 | -1.066378000 | 1  | -1.950799000 | -1.799649000 | 3.968177000  |
| 6                                         | 4.812946000  | -0.657886000 | -1.368436000 | 1  | -0.916281000 | -1.437797000 | 2.581467000  |
| 6                                         | 4.810987000  | 0.523076000  | -0.399768000 | 6  | 2.407932000  | -2.269000000 | 4.310365000  |
| 7                                         | 5.360217000  | 0.365826000  | 0.846411000  | 1  | 2.723307000  | -1.834100000 | 5.276731000  |
| 8                                         | -3.234010000 | 2.455942000  | 2.085933000  | 1  | 2.078388000  | -3.307501000 | 4.501975000  |
| 6                                         | -3.058999000 | 2.001350000  | 3.428763000  | 6  | 3.582495000  | -2.351547000 | 3.507079000  |
| 6                                         | -2.600877000 | 0.542853000  | 3.374947000  | 1  | 4.294082000  | -3.081166000 | 3.794083000  |
| 8                                         | -3.373956000 | -0.271454000 | 2.890553000  | 1  | 3.253306000  | -2.733857000 | 2.387233000  |
| 7                                         | -0.954391000 | -2.343439000 | -1.724178000 | 6  | 5.579256000  | -1.144538000 | 2.823522000  |
| 6                                         | 0.283560000  | -2.902950000 | -1.930605000 | 1  | 6.123629000  | -0.386183000 | 3.404305000  |
| 6                                         | 0.274351000  | -4.281371000 | -1.576917000 | 1  | 6.016431000  | -2.119744000 | 3.094443000  |
| 6                                         | -1.010564000 | -4.575011000 | -1.176481000 | 6  | 5.796105000  | -0.936281000 | 1.332543000  |
| 6                                         | -1.749256000 | -3.363147000 | -1.258359000 | 1  | 6.876244000  | -1.078680000 | 1.139312000  |
| 6                                         | -3.087350000 | -3.236500000 | -0.805418000 | 1  | 5.251125000  | -1.714627000 | 0.783337000  |
| 6                                         | -3.818056000 | -4.487835000 | -0.460687000 | 6  | -0.442193000 | 1.108513000  | 4.469880000  |
| 6                                         | -4.172797000 | -4.785934000 | 0.863789000  | 6  | 0.069036000  | 2.230057000  | 3.563574000  |
| 6                                         | -4.851849000 | -5.963887000 | 1.176202000  | 1  | -0.873712000 | 1.517710000  | 5.396649000  |
| 6                                         | -5.186329000 | -6.869184000 | 0.169024000  | 1  | 0.436167000  | 0.529020000  | 4.777464000  |
| 6                                         | -4.833446000 | -6.589415000 | -1.152180000 | 1  | -0.381173000 | 3.202983000  | 3.826947000  |
| 6                                         | -4.153297000 | -5.412486000 | -1.461935000 | 1  | -0.192690000 | 1.999042000  | 2.516083000  |
| 7                                         | -3.132550000 | -0.771796000 | -0.835703000 | 6  | 1.994919000  | 3.550989000  | 3.199918000  |
| 6                                         | -3.695004000 | -2.011935000 | -0.592818000 | 1  | 1.615068000  | 4.394555000  | 3.804346000  |
| 6                                         | -5.006612000 | -1.852922000 | -0.000151000 | 6  | 3.492537000  | 3.503688000  | 3.290163000  |
| 6                                         | -5.194064000 | -0.526551000 | 0.195048000  | 1  | 1.680855000  | 3.716332000  | 2.152415000  |
| 6                                         | -4.037468000 | 0.142666000  | -0.359311000 | 1  | 3.904047000  | 4.500629000  | 3.044944000  |
| 8                                         | 4.421013000  | 1.609932000  | -0.800339000 | 1  | 3.788193000  | 3.260476000  | 4.326861000  |
| 1                                         | -3.903975000 | -4.084464000 | -1.657906000 | 6  | 5.965366000  | 1.557627000  | 1.439725000  |
| 1                                         | 1.124595000  | -4.957123000 | -1.628803000 | 1  | 7.008745000  | 1.312060000  | 1.701971000  |
| 1                                         | -1.400839000 | -5.529968000 | -0.831306000 | 1  | 5.987706000  | 2.321625000  | 0.651752000  |
| 1                                         | 3.210165000  | -0.825219000 | -4.168682000 | 6  | 5.316084000  | 2.173278000  | 2.661894000  |
| 1                                         | 2.349221000  | 1.657076000  | -4.759625000 | 1  | 5.914471000  | 3.070344000  | 2.908376000  |
|                                           |              |              |              | 1  | 5.350576000  | 1.514932000  | 3.547490000  |





|                                 |              |              |              |    |              |              |              |
|---------------------------------|--------------|--------------|--------------|----|--------------|--------------|--------------|
| 1                               | -1.069329000 | -3.528368000 | 4.529278000  | 6  | -2.966712000 | -1.564270000 | 2.480761000  |
| 1                               | 0.364577000  | -3.542996000 | 3.525325000  | 8  | -3.607219000 | -1.868374000 | 1.483877000  |
| 1                               | -0.648867000 | -1.320176000 | 5.105488000  | 7  | -0.599407000 | -0.946496000 | -2.667455000 |
| 1                               | -0.492313000 | -0.852850000 | 3.379967000  | 6  | 0.699178000  | -1.313684000 | -2.899292000 |
| 6                               | 1.646266000  | -0.364699000 | 5.027968000  | 6  | 0.773708000  | -2.722403000 | -3.185837000 |
| 1                               | 1.214220000  | -0.382360000 | 6.044962000  | 6  | -0.507533000 | -3.188195000 | -3.174458000 |
| 6                               | 3.145213000  | -0.358535000 | 5.128274000  | 6  | -1.352092000 | -2.071877000 | -2.838318000 |
| 1                               | 1.291845000  | 0.555776000  | 4.526995000  | 6  | -2.742374000 | -2.169888000 | -2.639206000 |
| 1                               | 3.457167000  | 0.448848000  | 5.816675000  | 6  | -3.410823000 | -3.449668000 | -3.000852000 |
| 1                               | 3.487596000  | -1.318903000 | 5.554571000  | 6  | -3.992276000 | -4.262770000 | -2.015561000 |
| 6                               | 5.743502000  | 0.243224000  | 2.629337000  | 6  | -4.600951000 | -5.469548000 | -2.356959000 |
| 1                               | 6.811556000  | -0.033504000 | 2.636475000  | 6  | -4.640020000 | -5.883730000 | -3.688889000 |
| 1                               | 5.674606000  | 1.325240000  | 2.797477000  | 6  | -4.062529000 | -5.085713000 | -4.676910000 |
| 6                               | 5.079192000  | -0.453619000 | 3.800717000  | 6  | -3.449942000 | -3.880709000 | -4.335303000 |
| 1                               | 5.585108000  | -0.079258000 | 4.710078000  | 7  | -2.973825000 | 0.011384000  | -1.526651000 |
| 1                               | 5.220107000  | -1.548603000 | 3.787366000  | 6  | -3.486367000 | -1.159847000 | -2.021586000 |
| 8                               | 3.288209000  | -3.567235000 | 4.094136000  | 6  | -4.883019000 | -1.281467000 | -1.663982000 |
| 1                               | 2.558692000  | -2.935704000 | 4.194339000  | 6  | -5.168386000 | -0.238186000 | -0.845587000 |
| 1                               | 3.690092000  | -3.348765000 | 3.238217000  | 6  | -3.973115000 | 0.566410000  | -0.777584000 |
| 6                               | -0.237726000 | 0.259372000  | 0.227433000  | 8  | 4.456850000  | 1.759942000  | 1.220319000  |
| 8                               | -0.433558000 | -0.688796000 | 0.970413000  | 1  | -3.953006000 | -3.944751000 | -0.970760000 |
| 8                               | 0.844173000  | 1.032722000  | 0.566372000  | 1  | 1.684890000  | -3.280734000 | -3.387262000 |
| 8                               | -1.803456000 | 1.518318000  | 3.177359000  | 1  | -0.849170000 | -4.205476000 | -3.352117000 |
| 1                               | -2.451220000 | 0.694127000  | 3.100608000  | 1  | 3.644258000  | 1.645119000  | -3.629908000 |
| 1                               | 0.916821000  | 1.705283000  | -0.132427000 | 1  | 2.651259000  | 4.100515000  | -3.120563000 |
| 1                               | -2.160103000 | 2.239919000  | 2.557269000  | 1  | -1.495544000 | 5.731451000  | -0.180155000 |
| 1                               | -1.809636000 | 1.860975000  | 4.088336000  | 1  | -3.654824000 | 4.487504000  | 0.868082000  |
|                                 |              |              |              | 1  | -6.110694000 | -0.001455000 | -0.356114000 |
|                                 |              |              |              | 1  | -5.546213000 | -2.082975000 | -1.980548000 |
|                                 |              |              |              | 1  | 2.575341000  | -1.385780000 | -5.349411000 |
|                                 |              |              |              | 1  | 4.754555000  | -2.398429000 | -5.976068000 |
|                                 |              |              |              | 1  | 6.552883000  | -2.622783000 | -4.249969000 |
|                                 |              |              |              | 1  | 6.154580000  | -1.812556000 | -1.945704000 |
|                                 |              |              |              | 1  | -0.970007000 | 6.150084000  | -3.052394000 |
|                                 |              |              |              | 1  | -0.101146000 | 8.474212000  | -3.037940000 |
|                                 |              |              |              | 1  | 1.986311000  | 9.021120000  | -1.789480000 |
|                                 |              |              |              | 1  | 3.191926000  | 7.223008000  | -0.553193000 |
|                                 |              |              |              | 1  | 2.319864000  | 4.900947000  | -0.568862000 |
|                                 |              |              |              | 1  | -6.202930000 | 3.223882000  | -0.187919000 |
|                                 |              |              |              | 1  | -7.870969000 | 3.568816000  | 1.626234000  |
|                                 |              |              |              | 1  | -7.476305000 | 2.554781000  | 3.874868000  |
|                                 |              |              |              | 1  | -5.420862000 | 1.242055000  | 4.299899000  |
|                                 |              |              |              | 1  | -5.043170000 | -6.092734000 | -1.575600000 |
|                                 |              |              |              | 1  | -5.118373000 | -6.829185000 | -3.956344000 |
|                                 |              |              |              | 1  | -4.090455000 | -5.401669000 | -5.722762000 |
|                                 |              |              |              | 1  | -3.001623000 | -3.256909000 | -5.112789000 |
|                                 |              |              |              | 1  | 5.808502000  | 0.220230000  | -0.992585000 |
|                                 |              |              |              | 1  | 4.401383000  | 1.313230000  | -1.116173000 |
|                                 |              |              |              | 1  | -2.969208000 | -0.194971000 | 4.256083000  |
|                                 |              |              |              | 1  | -4.538015000 | -0.666803000 | 3.572656000  |
|                                 |              |              |              | 7  | -1.838429000 | -2.225717000 | 2.840214000  |
|                                 |              |              |              | 19 | 2.079671000  | -0.781864000 | 1.829745000  |
|                                 |              |              |              | 8  | 0.838128000  | -0.577520000 | 4.440171000  |
|                                 |              |              |              | 8  | 0.964799000  | -3.501325000 | 1.867664000  |
|                                 |              |              |              | 8  | 3.504574000  | 0.290571000  | 4.027539000  |
|                                 |              |              |              | 8  | 3.849014000  | -2.927630000 | 2.212477000  |
|                                 |              |              |              | 6  | -0.259560000 | -4.134817000 | 2.187415000  |
|                                 |              |              |              | 1  | -0.244502000 | -4.503272000 | 3.231142000  |
|                                 |              |              |              | 6  | -1.468833000 | -3.282518000 | 1.893258000  |
|                                 |              |              |              | 1  | -0.367264000 | -5.030663000 | 1.548524000  |
|                                 |              |              |              | 1  | -2.326962000 | -3.967394000 | 1.802121000  |
|                                 |              |              |              | 1  | -1.336074000 | -2.817614000 | 0.905017000  |
|                                 |              |              |              | 6  | 2.014109000  | -4.441122000 | 1.808632000  |
|                                 |              |              |              | 1  | 2.197521000  | -4.879085000 | 2.807722000  |
|                                 |              |              |              | 1  | 1.735973000  | -5.268689000 | 1.128595000  |
|                                 |              |              |              | 6  | 3.289074000  | -3.839268000 | 1.278779000  |
|                                 |              |              |              | 1  | 3.996235000  | -4.666901000 | 1.099942000  |
| <b><sup>3</sup>TS2 H3O+, K+</b> |              |              |              |    |              |              |              |
| 6                               | 1.792850000  | 5.684287000  | -1.119747000 |    |              |              |              |
| 6                               | 0.619494000  | 5.363474000  | -1.819293000 |    |              |              |              |
| 6                               | -0.055721000 | 6.386461000  | -2.502086000 |    |              |              |              |
| 6                               | 0.433967000  | 7.691794000  | -2.494069000 |    |              |              |              |
| 6                               | 1.603421000  | 7.997659000  | -1.797554000 |    |              |              |              |
| 6                               | 2.280011000  | 6.990349000  | -1.108705000 |    |              |              |              |
| 6                               | 0.081076000  | 3.975439000  | -1.827014000 |    |              |              |              |
| 6                               | 0.859620000  | 2.946180000  | -2.377439000 |    |              |              |              |
| 7                               | 0.547190000  | 1.608788000  | -2.363251000 |    |              |              |              |
| 6                               | 1.656393000  | 0.953950000  | -2.823838000 |    |              |              |              |
| 6                               | 2.681075000  | 1.900928000  | -3.192476000 |    |              |              |              |
| 6                               | 2.177255000  | 3.138480000  | -2.941114000 |    |              |              |              |
| 26                              | -1.160760000 | 0.757001000  | -1.784458000 |    |              |              |              |
| 7                               | -1.849001000 | 2.569677000  | -1.192796000 |    |              |              |              |
| 6                               | -2.910019000 | 2.738208000  | -0.349480000 |    |              |              |              |
| 6                               | -2.898378000 | 4.067833000  | 0.205619000  |    |              |              |              |
| 6                               | -1.819987000 | 4.707089000  | -0.349881000 |    |              |              |              |
| 6                               | -1.163260000 | 3.752100000  | -1.199763000 |    |              |              |              |
| 6                               | -3.889656000 | 1.771157000  | -0.076705000 |    |              |              |              |
| 6                               | -4.883932000 | 2.020540000  | 1.004995000  |    |              |              |              |
| 6                               | -4.681806000 | 1.457615000  | 2.280577000  |    |              |              |              |
| 6                               | -5.605309000 | 1.656912000  | 3.307070000  |    |              |              |              |
| 6                               | -6.755820000 | 2.405944000  | 3.067386000  |    |              |              |              |
| 6                               | -6.973559000 | 2.975719000  | 1.814558000  |    |              |              |              |
| 6                               | -6.037750000 | 2.785788000  | 0.799406000  |    |              |              |              |
| 6                               | 1.789059000  | -0.433707000 | -2.961803000 |    |              |              |              |
| 6                               | 3.121369000  | -1.006525000 | -3.305269000 |    |              |              |              |
| 6                               | 3.368624000  | -1.478717000 | -4.603672000 |    |              |              |              |
| 6                               | 4.589120000  | -2.047041000 | -4.955280000 |    |              |              |              |
| 6                               | 5.593099000  | -2.167616000 | -3.994917000 |    |              |              |              |
| 6                               | 5.370741000  | -1.711025000 | -2.699580000 |    |              |              |              |
| 6                               | 4.148050000  | -1.127144000 | -2.353379000 |    |              |              |              |
| 8                               | 3.938880000  | -0.700077000 | -1.059019000 |    |              |              |              |
| 6                               | 4.765897000  | 0.379220000  | -0.664049000 |    |              |              |              |
| 6                               | 4.783320000  | 0.644776000  | 0.839659000  |    |              |              |              |
| 7                               | 5.244293000  | -0.310375000 | 1.706230000  |    |              |              |              |
| 8                               | -3.499977000 | 0.777778000  | 2.507121000  |    |              |              |              |
| 6                               | -3.502391000 | -0.401224000 | 3.320647000  |    |              |              |              |







|             |                 |              |              |   |              |              |              |
|-------------|-----------------|--------------|--------------|---|--------------|--------------|--------------|
| 1           | -5.454546000    | 0.956727000  | 2.972450000  | 6 | -5.288288000 | 1.473999000  | 0.375194000  |
| 7           | -2.465608000    | -0.510326000 | 2.687324000  | 6 | -4.865251000 | 2.544948000  | 1.187004000  |
| 19          | 1.912362000     | -0.213695000 | 0.754653000  | 6 | -5.783555000 | 3.383850000  | 1.817723000  |
| 8           | 0.420998000     | 1.642803000  | 2.331536000  | 6 | -7.150831000 | 3.154731000  | 1.672343000  |
| 8           | 0.347681000     | -2.203018000 | 2.726906000  | 6 | -7.596912000 | 2.100053000  | 0.879105000  |
| 8           | 3.211514000     | 2.109119000  | 2.181158000  | 6 | -6.669559000 | 1.282284000  | 0.234719000  |
| 8           | 3.079612000     | -1.480199000 | 3.215229000  | 6 | 1.352442000  | -2.667027000 | -2.477064000 |
| 6           | -1.005976000    | -2.559020000 | 2.931432000  | 6 | 2.704492000  | -3.243197000 | -2.742485000 |
| 1           | -1.272503000    | -2.467230000 | 4.002444000  | 6 | 2.989351000  | -3.919659000 | -3.931440000 |
| 6           | -1.948516000    | -1.727790000 | 2.081199000  | 6 | 4.271574000  | -4.389815000 | -4.221043000 |
| 1           | -1.135088000    | -3.623281000 | 2.656863000  | 6 | 5.294751000  | -4.175398000 | -3.302477000 |
| 1           | -2.825724000    | -2.339632000 | 1.843068000  | 6 | 5.039149000  | -3.514538000 | -2.099932000 |
| 1           | -1.459297000    | -1.489293000 | 1.119692000  | 6 | 3.749132000  | -3.061736000 | -1.807915000 |
| 6           | 1.216403000     | -2.996833000 | 3.497572000  | 8 | 3.401879000  | -2.477869000 | -0.631046000 |
| 1           | 1.122356000     | -2.742499000 | 4.571497000  | 6 | 4.349947000  | -1.924743000 | 0.227958000  |
| 1           | 0.958505000     | -4.068454000 | 3.388958000  | 6 | 4.635544000  | -0.465976000 | -0.156718000 |
| 6           | 2.643185000     | -2.819197000 | 3.042458000  | 7 | 5.429651000  | 0.282283000  | 0.667776000  |
| 1           | 3.284803000     | -3.513326000 | 3.609101000  | 8 | -3.509757000 | 2.796514000  | 1.313219000  |
| 1           | 2.725021000     | -3.082618000 | 1.973868000  | 6 | -2.936664000 | 3.026328000  | 2.595035000  |
| 6           | 4.175249000     | -1.230001000 | 4.076945000  | 6 | -2.165227000 | 1.772544000  | 3.007587000  |
| 1           | 3.910982000     | -0.341160000 | 4.667460000  | 8 | -2.727103000 | 0.697997000  | 2.865539000  |
| 1           | 4.314895000     | -2.063666000 | 4.785224000  | 7 | -0.744417000 | -2.974663000 | -1.177903000 |
| 6           | 5.477924000     | -0.992043000 | 3.317990000  | 6 | 0.486902000  | -3.393098000 | -1.609139000 |
| 1           | 6.223847000     | -0.605382000 | 4.029213000  | 6 | 0.779141000  | -4.676536000 | -1.061255000 |
| 1           | 5.887212000     | -1.938211000 | 2.944586000  | 6 | -0.298666000 | -5.025418000 | -0.272236000 |
| 6           | -1.509835000    | 0.494044000  | 3.110057000  | 6 | -1.229573000 | -3.942320000 | -0.343218000 |
| 6           | -0.934808000    | 1.376210000  | 2.003082000  | 6 | -2.429143000 | -3.842874000 | 0.429097000  |
| 1           | -1.954306000    | 1.115254000  | 3.898590000  | 6 | -2.795439000 | -5.032891000 | 1.249457000  |
| 1           | -0.667941000    | -0.031083000 | 3.585284000  | 6 | -2.764358000 | -4.991813000 | 2.651950000  |
| 1           | -1.490889000    | 2.319359000  | 1.913719000  | 6 | -3.106431000 | -6.110884000 | 3.411691000  |
| 1           | -1.003475000    | 0.879162000  | 1.018409000  | 6 | -3.482532000 | -7.297922000 | 2.782926000  |
| 6           | 0.958733000     | 2.838697000  | 1.807373000  | 6 | -3.512467000 | -7.356643000 | 1.388632000  |
| 1           | 0.275165000     | 3.683865000  | 2.003717000  | 6 | -3.170609000 | -6.236668000 | 0.631894000  |
| 6           | 2.272346000     | 3.112922000  | 2.488408000  | 7 | -3.064171000 | -1.530927000 | -0.175718000 |
| 1           | 1.079414000     | 2.772263000  | 0.709037000  | 6 | -3.240911000 | -2.709091000 | 0.508930000  |
| 1           | 2.644935000     | 4.104628000  | 2.167426000  | 6 | -4.423314000 | -2.595728000 | 1.349280000  |
| 1           | 2.104288000     | 3.159803000  | 3.580992000  | 6 | -4.909382000 | -1.339125000 | 1.192318000  |
| 6           | 5.506527000     | 1.378286000  | 2.508776000  | 6 | -4.070732000 | -0.680294000 | 0.205780000  |
| 1           | 6.327388000     | 1.488651000  | 3.234253000  | 8 | 4.135862000  | -0.005699000 | -1.170101000 |
| 1           | 5.811170000     | 1.859094000  | 1.570051000  | 1 | -2.460147000 | -4.067936000 | 3.150814000  |
| 6           | 4.306867000     | 2.123507000  | 3.065709000  | 1 | 1.684649000  | -5.252575000 | -1.245166000 |
| 1           | 4.644656000     | 3.163290000  | 3.238229000  | 1 | -0.423050000 | -5.933475000 | 0.314444000  |
| 1           | 3.992051000     | 1.722231000  | 4.046630000  | 1 | 2.820406000  | -1.195991000 | -4.475671000 |
| 8           | 1.511172000     | 0.446899000  | 4.640275000  | 1 | 1.527741000  | 1.018750000  | -5.262969000 |
| 1           | 1.124508000     | 0.999102000  | 3.939540000  | 1 | -2.975926000 | 3.501594000  | -3.703411000 |
| 1           | 1.871112000     | -0.296456000 | 4.130387000  | 1 | -4.832260000 | 3.025815000  | -1.776457000 |
|             |                 |              |              | 1 | -5.779647000 | -0.898701000 | 1.674459000  |
|             |                 |              |              | 1 | -4.825086000 | -3.385048000 | 1.981305000  |
|             |                 |              |              | 1 | 2.179235000  | -4.064259000 | -4.651123000 |
|             |                 |              |              | 1 | 4.467959000  | -4.911173000 | -5.160556000 |
|             |                 |              |              | 1 | 6.308675000  | -4.525203000 | -3.512382000 |
|             |                 |              |              | 1 | 5.859201000  | -3.363086000 | -1.396912000 |
|             |                 |              |              | 1 | -2.351383000 | 2.048000000  | -6.046105000 |
|             |                 |              |              | 1 | -1.925491000 | 3.879694000  | -7.662809000 |
|             |                 |              |              | 1 | 0.003740000  | 5.424459000  | -7.326127000 |
|             |                 |              |              | 1 | 1.496824000  | 5.116170000  | -5.352154000 |
|             |                 |              |              | 1 | 1.059761000  | 3.285967000  | -3.734441000 |
|             |                 |              |              | 1 | -7.014122000 | 0.461077000  | -0.398648000 |
|             |                 |              |              | 1 | -8.666580000 | 1.917882000  | 0.752979000  |
|             |                 |              |              | 1 | -7.863887000 | 3.814392000  | 2.172163000  |
|             |                 |              |              | 1 | -5.430486000 | 4.224795000  | 2.418618000  |
|             |                 |              |              | 1 | -3.072959000 | -6.055464000 | 4.502973000  |
|             |                 |              |              | 1 | -3.750082000 | -8.175373000 | 3.377065000  |
|             |                 |              |              | 1 | -3.808602000 | -8.280897000 | 0.885476000  |
|             |                 |              |              | 1 | -3.199830000 | -6.287879000 | -0.459655000 |
|             |                 |              |              | 1 | 3.914978000  | -1.982321000 | 1.237033000  |
|             |                 |              |              | 1 | 5.288915000  | -2.500054000 | 0.263933000  |
| <b>5RC1</b> | <b>НЗО+, К+</b> |              |              |   |              |              |              |
| 6           | 0.406820000     | 3.412322000  | -4.602208000 |   |              |              |              |
| 6           | -0.671718000    | 2.531192000  | -4.778417000 |   |              |              |              |
| 6           | -1.506465000    | 2.724168000  | -5.891036000 |   |              |              |              |
| 6           | -1.266409000    | 3.753975000  | -6.799711000 |   |              |              |              |
| 6           | -0.185316000    | 4.617397000  | -6.613798000 |   |              |              |              |
| 6           | 0.650585000     | 4.442512000  | -5.510897000 |   |              |              |              |
| 6           | -0.932425000    | 1.430613000  | -3.808627000 |   |              |              |              |
| 6           | 0.005745000     | 0.402610000  | -3.700850000 |   |              |              |              |
| 7           | -0.066042000    | -0.682163000 | -2.865077000 |   |              |              |              |
| 6           | 1.053135000     | -1.449589000 | -3.087111000 |   |              |              |              |
| 6           | 1.874947000     | -0.810784000 | -4.099554000 |   |              |              |              |
| 6           | 1.221683000     | 0.310545000  | -4.495799000 |   |              |              |              |
| 26          | -1.435262000    | -1.008398000 | -1.353308000 |   |              |              |              |
| 7           | -2.517961000    | 0.649690000  | -2.052446000 |   |              |              |              |
| 6           | -3.630289000    | 1.167461000  | -1.437128000 |   |              |              |              |
| 6           | -3.985165000    | 2.397393000  | -2.045983000 |   |              |              |              |
| 6           | -3.018302000    | 2.652345000  | -3.024456000 |   |              |              |              |
| 6           | -2.123473000    | 1.541271000  | -3.014349000 |   |              |              |              |
| 6           | -4.297256000    | 0.595235000  | -0.304796000 |   |              |              |              |



|             |                 |              |              |    |              |              |              |
|-------------|-----------------|--------------|--------------|----|--------------|--------------|--------------|
| 1           | -7.571731000    | 4.716058000  | 1.007074000  | 6  | -0.193251000 | 7.604389000  | -2.512296000 |
| 1           | -5.121640000    | 5.054038000  | 0.977630000  | 6  | 0.994322000  | 7.970830000  | -1.878398000 |
| 1           | -2.846089000    | -3.397613000 | 6.819466000  | 6  | 1.778474000  | 6.993663000  | -1.264155000 |
| 1           | -3.560713000    | -5.785761000 | 6.757168000  | 6  | -0.246004000 | 3.852293000  | -1.937653000 |
| 1           | -3.751424000    | -6.958072000 | 4.564461000  | 6  | 0.606090000  | 2.914230000  | -2.558243000 |
| 1           | -3.235265000    | -5.751981000 | 2.459049000  | 7  | 0.423460000  | 1.556722000  | -2.545932000 |
| 1           | 3.913954000     | -1.461209000 | 1.678148000  | 6  | 1.517350000  | 0.985151000  | -3.124054000 |
| 1           | 5.207380000     | -2.408870000 | 0.948871000  | 6  | 2.426267000  | 2.022267000  | -3.558841000 |
| 1           | -2.036191000    | 4.706821000  | 0.740788000  | 6  | 1.853536000  | 3.216006000  | -3.227249000 |
| 1           | -3.312309000    | 4.497303000  | 1.951226000  | 26 | -1.162362000 | 0.469529000  | -1.707191000 |
| 7           | -0.540906000    | 3.309153000  | 2.527927000  | 7  | -2.058008000 | 2.309070000  | -1.245004000 |
| 19          | 2.570801000     | 1.520557000  | 1.024506000  | 6  | -3.148760000 | 2.386246000  | -0.434150000 |
| 8           | 1.852466000     | 4.134242000  | 0.381571000  | 6  | -3.258486000 | 3.733361000  | 0.088224000  |
| 8           | 2.420134000     | 2.502800000  | 3.568749000  | 6  | -2.210841000 | 4.445512000  | -0.447281000 |
| 8           | 4.073099000     | 2.732018000  | -0.914027000 | 6  | -1.461947000 | 3.534034000  | -1.276155000 |
| 8           | 5.091268000     | 2.100352000  | 2.534985000  | 6  | -4.041239000 | 1.330954000  | -0.134677000 |
| 6           | 1.236094000     | 2.778651000  | 4.284487000  | 6  | -5.098943000 | 1.580511000  | 0.891713000  |
| 1           | 1.192803000     | 3.841433000  | 4.589627000  | 6  | -4.874295000 | 1.284255000  | 2.247953000  |
| 6           | 0.016083000     | 2.362073000  | 3.501970000  | 6  | -5.859600000 | 1.489255000  | 3.211421000  |
| 1           | 1.236555000     | 2.184926000  | 5.216928000  | 6  | -7.108354000 | 1.972636000  | 2.827091000  |
| 1           | -0.784744000    | 2.151006000  | 4.225477000  | 6  | -7.358468000 | 2.274558000  | 1.489983000  |
| 1           | 0.220250000     | 1.399097000  | 3.001976000  | 6  | -6.357301000 | 2.084828000  | 0.539793000  |
| 6           | 3.594703000     | 2.706375000  | 4.322096000  | 6  | 1.729083000  | -0.400482000 | -3.303723000 |
| 1           | 3.917223000     | 3.760135000  | 4.249252000  | 6  | 3.087791000  | -0.844635000 | -3.731987000 |
| 1           | 3.408369000     | 2.477500000  | 5.386826000  | 6  | 3.325759000  | -1.250986000 | -5.053243000 |
| 6           | 4.694657000     | 1.786050000  | 3.859756000  | 6  | 4.575414000  | -1.708365000 | -5.462156000 |
| 1           | 5.552385000     | 1.908653000  | 4.544619000  | 6  | 5.617254000  | -1.783310000 | -4.537818000 |
| 1           | 4.353798000     | 0.736439000  | 3.925247000  | 6  | 5.404840000  | -1.389351000 | -3.220017000 |
| 6           | 6.322720000     | 1.534164000  | 2.128948000  | 6  | 4.153506000  | -0.913097000 | -2.817098000 |
| 1           | 6.835987000     | 2.280613000  | 1.506707000  | 8  | 3.952517000  | -0.545283000 | -1.504915000 |
| 1           | 6.968706000     | 1.360760000  | 3.006012000  | 6  | 4.707214000  | 0.584049000  | -1.111230000 |
| 6           | 6.190183000     | 0.214448000  | 1.383289000  | 6  | 4.656601000  | 0.958873000  | 0.370595000  |
| 1           | 7.215063000     | -0.146857000 | 1.177730000  | 7  | 5.125793000  | 0.095452000  | 1.331334000  |
| 1           | 5.727621000     | -0.521931000 | 2.050887000  | 8  | -3.599781000 | 0.866933000  | 2.623544000  |
| 6           | 0.148085000     | 4.520083000  | 2.097603000  | 6  | -3.412528000 | -0.162205000 | 3.609903000  |
| 6           | 0.545008000     | 4.622295000  | 0.628105000  | 6  | -2.819508000 | -1.390775000 | 2.918175000  |
| 1           | -0.470086000    | 5.397913000  | 2.341979000  | 8  | -3.456020000 | -1.860872000 | 1.985822000  |
| 1           | 1.058529000     | 4.634554000  | 2.700008000  | 7  | -0.541367000 | -1.213948000 | -2.767997000 |
| 1           | 0.512819000     | 5.690283000  | 0.341778000  | 6  | 0.750642000  | -1.406620000 | -3.162255000 |
| 1           | -0.163421000    | 4.082895000  | -0.020607000 | 6  | 0.950170000  | -2.804682000 | -3.484462000 |
| 6           | 2.167138000     | 4.195723000  | -1.001217000 | 6  | -0.251759000 | -3.422539000 | -3.308543000 |
| 1           | 1.869372000     | 5.179752000  | -1.406843000 | 6  | -1.181230000 | -2.412543000 | -2.846795000 |
| 6           | 3.645117000     | 4.038285000  | -1.232444000 | 6  | -2.520513000 | -2.663114000 | -2.464809000 |
| 1           | 1.595771000     | 3.423099000  | -1.547239000 | 6  | -3.054340000 | -4.034112000 | -2.701072000 |
| 1           | 3.852094000     | 4.257805000  | -2.296950000 | 6  | -3.414586000 | -4.860940000 | -1.625790000 |
| 1           | 4.192084000     | 4.776139000  | -0.618961000 | 6  | -3.905483000 | -6.146626000 | -1.848646000 |
| 6           | 5.931463000     | 1.177599000  | -0.906974000 | 6  | -4.047165000 | -6.627793000 | -3.150703000 |
| 1           | 7.033982000     | 1.174953000  | -0.872204000 | 6  | -3.691982000 | -5.815818000 | -4.228262000 |
| 1           | 5.625059000     | 0.734159000  | -1.862781000 | 6  | -3.197707000 | -4.531309000 | -4.005222000 |
| 6           | 5.476147000     | 2.626406000  | -0.885863000 | 7  | -3.000096000 | -0.470212000 | -1.452660000 |
| 1           | 5.913661000     | 3.101727000  | -1.784414000 | 6  | -3.361528000 | -1.730546000 | -1.821004000 |
| 1           | 5.867189000     | 3.180766000  | -0.014642000 | 6  | -4.712730000 | -1.994131000 | -1.363973000 |
| 8           | 4.249912000     | 4.800070000  | 1.894838000  | 6  | -5.106681000 | -0.905496000 | -0.649504000 |
| 1           | 3.387643000     | 4.628672000  | 1.482285000  | 6  | -4.022320000 | 0.050827000  | -0.719020000 |
| 1           | 4.605467000     | 3.914427000  | 2.074669000  | 8  | 4.324260000  | 2.102040000  | 0.644151000  |
| 6           | -0.120801000    | 0.036277000  | 0.256515000  | 1  | -3.296895000 | -4.490082000 | -0.604240000 |
| 8           | 0.590508000     | -0.316042000 | 1.203648000  | 1  | 1.883337000  | -3.254330000 | -3.816272000 |
| 8           | 0.178400000     | 1.301707000  | -0.184537000 | 1  | -0.481972000 | -4.475277000 | -3.458069000 |
| 8           | -1.423947000    | 2.829240000  | -1.709020000 | 1  | 3.364474000  | 1.860447000  | -4.086793000 |
| 1           | -2.204219000    | 2.894838000  | -1.126605000 | 1  | 2.242696000  | 4.212270000  | -3.425756000 |
| 1           | -0.455495000    | 1.633923000  | -0.860184000 | 1  | -1.979646000 | 5.495766000  | -0.281462000 |
| 1           | -1.798626000    | 2.529508000  | -2.549546000 | 1  | -4.067267000 | 4.116772000  | 0.710319000  |
|             |                 |              |              | 1  | -6.055705000 | -0.750290000 | -0.140759000 |
|             |                 |              |              | 1  | -5.280801000 | -2.902545000 | -1.552022000 |
|             |                 |              |              | 1  | 2.502032000  | -1.199025000 | -5.769572000 |
|             |                 |              |              | 1  | 4.733617000  | -2.011664000 | -6.499466000 |
|             |                 |              |              | 1  | 6.599294000  | -2.155141000 | -4.839438000 |
| <b>5RC2</b> | <b>H3O+, K+</b> |              |              |    |              |              |              |
| 6           | 1.379545000     | 5.658241000  | -1.286120000 |    |              |              |              |
| 6           | 0.186851000     | 5.276562000  | -1.920726000 |    |              |              |              |
| 6           | -0.594916000    | 6.269536000  | -2.530967000 |    |              |              |              |





|    |              |              |              |   |              |              |              |
|----|--------------|--------------|--------------|---|--------------|--------------|--------------|
| 7  | -2.188368000 | -0.138808000 | -1.405442000 | 1 | 1.815535000  | -0.246340000 | 6.522764000  |
| 6  | -2.310301000 | -1.432444000 | -1.831458000 | 6 | 3.212359000  | -1.071883000 | 5.158505000  |
| 6  | -3.606110000 | -1.940751000 | -1.446112000 | 1 | 1.798435000  | 0.530851000  | 4.919590000  |
| 6  | -4.229720000 | -0.951368000 | -0.748051000 | 1 | 3.982805000  | -0.454957000 | 5.658107000  |
| 6  | -3.336466000 | 0.179577000  | -0.736377000 | 1 | 3.251872000  | -2.082015000 | 5.602813000  |
| 8  | 4.413762000  | 0.847990000  | 1.058413000  | 6 | 5.267152000  | -1.453259000 | 2.166185000  |
| 1  | -1.671159000 | -4.151068000 | -0.702197000 | 1 | 6.124523000  | -2.123775000 | 1.983513000  |
| 1  | 2.925166000  | -1.850381000 | -4.350354000 | 1 | 5.657695000  | -0.435976000 | 2.293035000  |
| 1  | 0.879616000  | -3.519326000 | -3.839705000 | 6 | 4.625210000  | -1.881729000 | 3.475550000  |
| 1  | 3.728115000  | 3.410463000  | -3.746690000 | 1 | 5.391165000  | -1.719261000 | 4.255945000  |
| 1  | 2.204510000  | 5.466145000  | -2.936585000 | 1 | 4.377895000  | -2.955951000 | 3.499324000  |
| 1  | -2.381257000 | 5.893267000  | -0.252011000 | 8 | 2.137385000  | -4.025931000 | 4.496684000  |
| 1  | -4.173749000 | 4.133699000  | 0.727380000  | 1 | 1.611032000  | -3.243501000 | 4.716916000  |
| 1  | -5.215556000 | -0.978471000 | -0.290764000 | 1 | 2.303328000  | -3.952678000 | 3.542909000  |
| 1  | -3.991612000 | -2.930646000 | -1.678645000 | 6 | 0.742474000  | 1.559677000  | -0.141083000 |
| 1  | 3.517449000  | 1.729593000  | -5.744069000 | 8 | 1.418673000  | 2.176829000  | 0.525807000  |
| 1  | 5.837750000  | 1.397335000  | -6.554083000 | 8 | -0.707131000 | 0.444683000  | 1.716855000  |
| 1  | 7.457216000  | 0.096222000  | -5.151173000 | 8 | -1.325706000 | 2.965749000  | 2.520660000  |
| 1  | 6.712516000  | -0.820396000 | -2.950843000 | 1 | -2.249512000 | 2.674281000  | 2.608791000  |
| 1  | -1.604299000 | 6.526481000  | -3.196647000 | 1 | -1.552595000 | 0.162981000  | 1.337186000  |
| 1  | -1.303291000 | 8.985458000  | -3.028229000 | 1 | -0.858652000 | 1.380332000  | 1.988361000  |
| 1  | 0.359659000  | 9.934736000  | -1.432445000 | 1 | -1.365839000 | 3.649610000  | 1.837659000  |
| 1  | 1.715539000  | 8.404529000  | -0.006146000 |   |              |              |              |
| 1  | 1.410096000  | 5.945879000  | -0.177928000 |   |              |              |              |
| 1  | -6.211377000 | 1.861741000  | -0.857622000 |   |              |              |              |
| 1  | -8.233617000 | 1.824358000  | 0.592970000  |   |              |              |              |
| 1  | -7.980943000 | 1.405510000  | 3.044329000  |   |              |              |              |
| 1  | -5.738791000 | 1.077037000  | 4.021964000  |   |              |              |              |
| 1  | -2.149330000 | -6.549885000 | -1.123799000 |   |              |              |              |
| 1  | -2.387171000 | -7.384633000 | -3.462039000 |   |              |              |              |
| 1  | -2.143554000 | -5.797693000 | -5.368872000 |   |              |              |              |
| 1  | -1.662122000 | -3.402128000 | -4.942337000 |   |              |              |              |
| 1  | 3.524186000  | 1.015875000  | -1.143884000 |   |              |              |              |
| 1  | 2.592721000  | -0.500025000 | -1.006237000 |   |              |              |              |
| 1  | -2.292650000 | 0.771126000  | 4.244595000  |   |              |              |              |
| 1  | -3.945206000 | 0.172862000  | 4.407819000  |   |              |              |              |
| 7  | -2.076089000 | -1.960150000 | 3.953369000  |   |              |              |              |
| 19 | 1.154074000  | -1.369795000 | 2.218123000  |   |              |              |              |
| 8  | 0.797451000  | -1.285061000 | 5.050275000  |   |              |              |              |
| 8  | -0.198790000 | -3.813562000 | 2.370146000  |   |              |              |              |
| 8  | 3.466603000  | -1.133150000 | 3.772197000  |   |              |              |              |
| 8  | 2.575072000  | -3.782887000 | 1.549091000  |   |              |              |              |
| 6  | -0.985261000 | -4.211545000 | 3.476749000  |   |              |              |              |
| 1  | -0.363733000 | -4.210633000 | 4.389318000  |   |              |              |              |
| 6  | -2.233146000 | -3.375920000 | 3.624606000  |   |              |              |              |
| 1  | -1.334288000 | -5.249411000 | 3.334189000  |   |              |              |              |
| 1  | -2.846558000 | -3.848527000 | 4.412506000  |   |              |              |              |
| 1  | -2.800977000 | -3.418579000 | 2.687975000  |   |              |              |              |
| 6  | 0.468470000  | -4.899894000 | 1.763821000  |   |              |              |              |
| 1  | 0.938069000  | -5.539450000 | 2.532380000  |   |              |              |              |
| 1  | -0.249095000 | -5.523526000 | 1.198276000  |   |              |              |              |
| 6  | 1.535481000  | -4.416850000 | 0.819075000  |   |              |              |              |
| 1  | 1.932578000  | -5.295017000 | 0.282514000  |   |              |              |              |
| 1  | 1.111364000  | -3.731105000 | 0.062130000  |   |              |              |              |
| 6  | 3.870649000  | -3.868500000 | 0.981097000  |   |              |              |              |
| 1  | 4.574961000  | -4.073422000 | 1.800053000  |   |              |              |              |
| 1  | 3.924079000  | -4.735395000 | 0.302161000  |   |              |              |              |
| 6  | 4.302394000  | -2.645973000 | 0.190118000  |   |              |              |              |
| 1  | 5.271053000  | -2.897613000 | -0.279708000 |   |              |              |              |
| 1  | 3.594702000  | -2.478237000 | -0.630807000 |   |              |              |              |
| 6  | -1.632018000 | -1.632555000 | 5.304793000  |   |              |              |              |
| 6  | -0.431087000 | -0.716908000 | 5.465835000  |   |              |              |              |
| 1  | -2.454156000 | -1.177154000 | 5.883087000  |   |              |              |              |
| 1  | -1.408183000 | -2.581469000 | 5.812072000  |   |              |              |              |
| 1  | -0.370318000 | -0.476060000 | 6.543108000  |   |              |              |              |
| 1  | -0.574381000 | 0.241847000  | 4.936869000  |   |              |              |              |
| 6  | 1.875838000  | -0.444217000 | 5.437315000  |   |              |              |              |
